# Supplementary material for: Combination decoction of Astragalus mongholicus and Salvia miltiorrhiza mitigates pressure-overload cardiac dysfunction by inhibiting multiple ferroptosis pathways
Source: Front Pharmacol. 2024 Dec 16;15:1447546. doi: 10.3389/fphar.2024.1447546 (PMC11683366; doi:10.3389/fphar.2024.1447546)
Supplement: Supplementary file 2 [file Table2.XLSX]

## Sheet: Detailed Preparation Protocol f
Reagent, CAS Number	BQR,96187-53-0	Fer-1,347174-05-4	Era,571203-78-6	iFSP1,150651-39-1
Molar Mass (g/mol)	375.37	262.35	547.04	323.35
Maximum Solubility in DMSO (mM)	66.6	476.46	22.85	61.85
Target Solubility in DMSO (mM)	21.875	2.1875	21.875	2.1875
Target Final Concentration (mM)	2.1875	0.21875	2.1875	0.21875
Preparation Method
Amount (mg)	100	100	100	100
Volume of DMSO (mL)	12.1785	174.249	8.35666	141.377
Volume of PEG300 (mL)	48.7138	696.997	33.4266	565.508
Volume of Tween 80 (mL)	6.08923	87.1246	4.17833	70.6886
Volume of Saline (mL)	54.8031	784.122	37.605	636.197
