# Supplementary material for: Combination decoction of Astragalus mongholicus and Salvia miltiorrhiza mitigates pressure-overload cardiac dysfunction by inhibiting multiple ferroptosis pathways
Source: Front Pharmacol. 2024 Dec 16;15:1447546. doi: 10.3389/fphar.2024.1447546 (PMC11683366; doi:10.3389/fphar.2024.1447546)
Supplement: Supplementary file 3 [file Table3.XLSX]

## Sheet: file explanation
Table Header	Description
NameEN	Name of the substance identified through secondary mass spectrometry matching
InChIKey	InChIKey structural number of the substance
Formula	Molecular formula of the substance
ppm	Precision of mass-to-charge ratio matching in qualitative analysis, the closer to 0 the better
type	POS/NEG
*_PA	The peak area of each substance across different samples. HDCH, High-dose Astragalus-Salvia miltiorrhiza decoction; HDCL-S, low-dose Astragalus-Salvia miltiorrhiza medicated serum; HDCH-S, high-dose Astragalus-Salvia miltiorrhiza medicated serum; Control-S, control group serum
*_blood_level	Blood entry condition judgment level. Level I: Blood prototype component; Level II: Potential blood prototype component; Level III: Potential blood prototype component metabolite

## Sheet: composition analysis
NameEN	InChIKey	Formula	ppm	type	HDCH_PA	Control-S_PA	HDCL-S_PA	HDCH-S_PA
Luvungin F	OTRBJFPFSWOFPT-UHFFFAOYSA-N	C32H48O7	4.52238	pos	433511	3.54085e+09	2.55956e+09	3.32848e+09
Calycosin	ZZAJQOPSWWVMBI-UHFFFAOYSA-N	C16H12O5	0.0767753	pos	1.55243e+09	635207	1.67164e+09	3.07655e+09
Formononetin	HKQYGTCOTHHOMP-UHFFFAOYSA-N	C16H12O4	1.77823	pos	9.2322e+08	31669.3	1.18975e+09	1.64596e+09
Acacetin	DANYIYRPLHHOCZ-UHFFFAOYSA-N	C16H12O5	1.40411	neg	8.19982e+08	456427	1.00254e+09	1.50652e+09
Clinopodic acid C	KPKHMGUZUPELJC-UHFFFAOYSA-N	C27H22O12	2.30991	neg	9.2049e+08	0	9.02845e+08	1.48249e+09
6'-Malonyltrifolirhizin	ZHXRWFOBROFZAC-UHFFFAOYSA-N	C25H24O13	0.734439	pos	8.3994e+08	19580.9	6.78472e+08	1.35406e+09
Hoodistanaloside A	DKFHSGBKZJIVMD-UHFFFAOYSA-N	C46H74O18	1.06146	neg	8.2029e+08	144435	6.0301e+08	1.26558e+09
7-O-[6'-O-(3'',4''-dihydroxycinnamoyl)-beta-D-glucopyranosyl]-8-hydroxycoumarin	NRXBNSBNWUANMF-UHFFFAOYSA-N	C24H22O12	1.71583	neg	4.74584e+08	131784	7.8975e+08	1.11909e+09
(5S,9R)-14-(hydroxymethyl)-5,9-dimethyltetracyclo[11.2.1.0¹,¹⁰.0⁴,⁹]hexadecane-5-carboxylic acid	HHAMKMUMKLXDFQ-KFRFNOKNSA-N	C20H32O3	2.12361	neg	18697.2	1.80597e+09	7.51457e+08	1.03194e+09
Sphinganine	OTKJDMGTUTTYMP-ZWKOTPCHSA-N	C18H39NO2	1.14101	pos	9.14533e+07	2.71672e+08	7.24732e+08	9.47835e+08
Deoxyuridine	MXHRCPNRJAMMIM-SHYZEUOFSA-N	C9H12N2O5	1.90482	pos	151751	1.23043e+09	1.09594e+09	8.49452e+08
16-(4,9-dihydro-3H-beta-carbolin-1-yl)-17-nor-coryn-19-ene|3,4-Dihydro-usambarensin	QIBOKZAYILIQKG-UHFFFAOYSA-N	C29H30N4	1.45747	neg	5.91116e+06	9.13576e+08	1.15915e+09	8.09776e+08
lycopic acid C	UETMHVLDDNLIIW-UHFFFAOYSA-N	C27H20O11	0.146487	pos	2.08429e+07	580445	6.05429e+08	7.9501e+08
calycosin-7-O-beta-D-glucoside	MGJLSBDCWOSMHL-MIUGBVLSSA-N	C22H22O9	2.27891	pos	3.66301e+08	156324	4.26311e+08	7.86118e+08
3'',4''-Diacetylafzelin	SXOZSDJHGMAEGZ-UHFFFAOYSA-N	C25H24O12	1.00847	pos	4.02911e+08	31926.4	3.73391e+08	7.52222e+08
Gerronemin D	NAKZWEKDEOZWPV-UHFFFAOYSA-N	C26H36O4	1.14514	pos	6.96389e+06	2.19356e+08	2.25752e+08	6.99018e+08
L-Isoleucine	AGPKZVBTJJNPAG-WHFBIAKZSA-N	C6H13NO2	3.67917	pos	1.39624e+08	6.19175e+08	7.68623e+08	6.93522e+08
AC1LCEQS	BABJNKGTTYCTOO-UHFFFAOYSA-N	C18H12O7	1.37735	pos	4.59266e+08	19552.4	4.46984e+08	6.91754e+08
Docosahexaenoic acid	MBMBGCFOFBJSGT-KUBAVDMBSA-N	C22H32O2	1.52563	neg	0	8.03309e+08	5.64503e+08	6.84284e+08
13-deoxyitol A	DPPIFGXHAZYFLP-UHFFFAOYSA-N	C20H32O5	1.34326	pos	6.58012e+08	4.15918e+06	2.42058e+08	6.61701e+08
Chrysosplenetin	NBVTYGIYKCPHQN-UHFFFAOYSA-N	C19H18O8	0.337836	neg	530714	4794.61	5.02137e+08	5.92269e+08
METHYL GALACTOSIDE	HOVAGTYPODGVJG-UHFFFAOYSA-N	C7H14O6	0.00723099	pos	8.60056e+06	9.94893e+06	4.63118e+08	5.48782e+08
ACMC-20n64k	MEAZTWJVOWHKJM-UHFFFAOYSA-N	C48H93NO11S	0.942572	pos	0	4.24294e+08	4.36499e+08	5.43837e+08
21,22-diisopentenylpaspalinine|shearinine F|shearinine K	SEXKBUMMQJIMIE-UHFFFAOYSA-N	C37H47NO4	0.634737	pos	20605.4	7.36942e+08	6.62506e+08	5.37078e+08
3-Furanoic acid	IHCCAYCGZOLTEU-UHFFFAOYSA-N	C5H4O3	1.51008	neg	4.65747e+08	4.1395e+07	3.38809e+08	5.13955e+08
(1S,2R,3S)-2,3-Dihydro-4-(4-hydroxyphenyl)-1H-phenalene-1,2,3-triol	SPLDXWBMWDTALK-UHFFFAOYSA-N	C19H16O4	2.65456	pos	2.03126e+08	198904	2.35254e+08	5.04376e+08
(13R)-labda-14(15)-ene-8,13-diol 13-O-alpha-L-6'-deoxyidopyranoside	QIFUWGZVLWAGTD-UHFFFAOYSA-N	C26H46O6	1.92146	pos	0	7.86663e+07	3.31442e+07	5.02703e+08
(23R)-3beta-Acetoxy-17,23-epoxy-veratra-5,12-dien-11-on|(23R)-3beta-acetoxy-17,23-epoxy-veratra-5,12-dien-11-one|3-O-acetyljervine|O-acetyl-jervine|O-acetyljervine	UQVIFHXKIPQADQ-UHFFFAOYSA-N	C29H41NO4	0.826278	pos	259711	6.40491e+08	1.00974e+09	4.74116e+08
Fexofenadine	RWTNPBWLLIMQHL-UHFFFAOYSA-N	C32H39NO4	2.38527	pos	158305	4.95675e+08	3.50894e+08	4.49023e+08
D-Proline	ONIBWKKTOPOVIA-SCSAIBSYSA-N	C5H9NO2	2.69801	pos	1.57874e+08	6.80312e+07	2.02193e+08	4.21052e+08
Bergapten	BGEBZHIAGXMEMV-UHFFFAOYSA-N	C12H8O4	0.164213	neg	4.26543e+06	1.516e+08	3.80661e+08	4.18462e+08
PHENYLALANINE	COLNVLDHVKWLRT-UHFFFAOYSA-N	C9H11NO2	0.35971	pos	1.63211e+08	3.42761e+08	4.37701e+08	4.16506e+08
Cryptotanshinone	GVKKJJOMQCNPGB-JTQLQIEISA-N	C19H20O3	1.6293	pos	6.06288e+08	0	1.97931e+08	4.15484e+08
Malyngamide I acetate	PBSMCFLXUIGLJN-UHFFFAOYSA-N	C28H44ClNO6	1.44617	pos	47175.7	4.43517e+08	4.82614e+08	4.01472e+08
FA 18:1+3O	MDIUMSLCYIJBQC-UHFFFAOYSA-N	C18H34O5	0.9899	neg	2.55799e+08	3.39829e+06	1.28925e+08	3.91796e+08
(9E)-8,11,12-trihydroxyoctadecenoic acid methyl ester|tianshic acid methyl ester	VAGGDCACZPJMFS-UHFFFAOYSA-N	C19H36O5	0.208632	neg	107577	2.21979e+06	3.21573e+08	3.86407e+08
Caffeic Acid	QAIPRVGONGVQAS-DUXPYHPUSA-N	C9H8O4	2.38952	neg	1.4126e+08	0	2.18548e+08	3.76529e+08
(2E)-1-(3,4-dihydro-5-hydroxy-2,2-dimethyl-2H-1-benzopyran-6-yl)-3-[2,2-dimethyl-8-(3-methylbut-2-enyl)-2H-1-benzopyran-6-yl]prop-2-en-1-one|tokinochromane C	HVIDBSFBKXOQKK-UHFFFAOYSA-N	C30H34O4	0.948212	pos	2.37639e+06	3.95849e+08	3.14108e+08	3.41997e+08
Ganosinensin C	XESIYWREAFIQIZ-UHFFFAOYSA-N	C51H74O8	0.999237	pos	42909.8	3.52771e+08	3.73658e+08	3.36342e+08
1-(ethoxycarbonyl)-5-hydroxyanthraquinone-3-carboxylic acid|4-(ethoxycarbonyl)-9,10-dihydro-8-hydroxy-9,10-dioxoanthracene-2-carboxylic acid|juglanthraquinone A	VHBBNZOLKSMMFC-UHFFFAOYSA-N	C18H12O7	1.46855	neg	2.13633e+08	33988.2	1.98935e+08	3.30331e+08
3,6,9-Trimethyl-7-hydroxy-7-(2-oxopropyl)-2,3,7,8-tetrahydronaphtho[1,8-bc]pyran-8-one	UTWJVJSYBONGHX-UHFFFAOYSA-N	C18H20O4	0.795942	pos	2.42186e+07	3.59114e+06	9.59944e+07	3.04888e+08
MCULE-9344974069	VTWHFQDOQSSIID-UHFFFAOYSA-N	C12H16O8	1.33066	pos	1.35376e+07	1.4126e+08	1.32804e+09	3.03492e+08
Methyl DL-pyroglutamate	HQGPKMSGXAUKHT-UHFFFAOYSA-N	C6H9NO3	1.85714	pos	4.88777e+07	1.5081e+07	2.13126e+08	2.9358e+08
L-Malic acid	BJEPYKJPYRNKOW-REOHCLBHSA-N	C4H6O5	4.13762	neg	7.25469e+08	4.31635e+06	1.09266e+08	2.85734e+08
Nodulisporic acid C2	RJBBYXNTYMCJHA-UHFFFAOYSA-N	C43H59NO7	15.2408	pos	0	3.17172e+08	2.04694e+08	2.84144e+08
Tauroallocholic acid	WBWWGRHZICKQGZ-UHFFFAOYSA-N	C26H45NO7S	1.66514	neg	0	4.91844e+08	2.15301e+08	2.83577e+08
7beta,11-epoxycuauthemone 3-O-epoxyangelate	KMNGBPKXTNCURX-UHFFFAOYSA-N	C20H30O6	0.456679	pos	1.38271e+06	6.46135e+06	1.56559e+08	2.74176e+08
3-Oxo-2-(2-entenyl)cyclopentaneoctanoic acid	BZXZFDKIRZBJEP-UHFFFAOYSA-N	C18H30O3	2.85279	pos	2.26475e+08	559067	8.3608e+07	2.71389e+08
Armillaramide	IVBULNXGVIHEKN-UHFFFAOYSA-N	C34H69NO4	0.515816	pos	452807	2.79638e+08	2.96121e+08	2.67024e+08
CHEMBL3426665	AHNJHIHTDFTTJW-UHFFFAOYSA-N	C19H20O3	0.351046	pos	9.30406e+07	556709	1.33513e+08	2.5857e+08
Isoformononetin	LNIQZRIHAMVRJA-UHFFFAOYSA-N	C16H12O4	1.36059	pos	2.26848e+08	777115	2.10946e+08	2.58083e+08
Salvianolic acid A	YMGFTDKNIWPMGF-UCPJVGPRSA-N	C26H22O10	0.421413	neg	1.70747e+08	98381.6	1.7423e+08	2.54562e+08
nimbolinin D	GVCKQCGCUAALBH-UHFFFAOYSA-N	C36H44O9	1.54977	neg	23194	2.66209e+08	1.81635e+08	2.47259e+08
5-(1,2-dithiolan-3-yl)pentanoic acid	AGBQKNBQESQNJD-UHFFFAOYSA-N	C8H14O2S2	2.39248	pos	0	1.20102e+07	1.6834e+08	2.2488e+08
Lithospermic acid	UJZQBMQZMKFSRV-FGCOXFRFSA-N	C27H22O12	0.714836	pos	1.45748e+08	18983.1	1.43667e+08	2.21818e+08
D-Sphingosine	WWUZIQQURGPMPG-KRWOKUGFSA-N	C18H37NO2	0.406361	pos	39569.5	1.65765e+08	2.10467e+08	2.20143e+08
(E)-5-(Methylthio)-1-phenyl-4-penten-2-yn-1-one|trans-5-Methylthio-1-phenylpent-4-en-2-in-1-on	FVLHLTHPRFIJEO-UHFFFAOYSA-N	C12H10OS	1.02722	pos	1.40757e+07	2.12548e+08	1.5776e+08	2.16385e+08
Cucurbitachrome 1	YMNKXGQZDVGTFM-OMSIYMKDSA-N	C40H56O4	1.48121	pos	0	1.53737e+08	1.12185e+08	2.16118e+08
Methylnissolin	UOVGCLXUTLXAEC-WFASDCNBSA-N	C17H16O5	1.32366	pos	1.34098e+08	103296	6.80704e+07	2.15045e+08
Salicylic acid	YGSDEFSMJLZEOE-UHFFFAOYSA-N	C7H6O3	2.87047	neg	1.20617e+08	2.98552e+06	1.16158e+08	2.11619e+08
Sphinganine 1-phosphate	YHEDRJPUIRMZMP-ZWKOTPCHSA-N	C18H40NO5P	0.890631	pos	781761	2.35236e+08	2.36558e+08	2.11007e+08
6-hydroxysalvinolone	CIAYUCBRAFIKOE-UHFFFAOYSA-N	C18H20O3	0.233495	pos	2.52996e+07	1.3951e+06	4.69221e+07	2.09055e+08
8-hydroxy-5,7-dimethoxy-2-phenyl-2,3-dihydrochromen-4-one	TVWVHFSJQNXIRZ-UHFFFAOYSA-N	C17H16O5	1.27743	pos	2.59553e+08	0	5.80908e+07	2.08674e+08
(20R)-cynanogenin C 3-O-beta-D-glucopyranosyl-(1->4)-beta-D-cymaropyranosyl-(1->4)-alpha-L-diginopyranosyl-(1->4)-beta-D-cymaropyranoside|cynanoside P4	UODGLRPIXDWIGM-UHFFFAOYSA-N	C48H74O19	1.76695	neg	1.72807e+08	7469.8	1.12551e+08	2.08442e+08
4-[4-(3,4-dihydroxyphenyl)-2,3-dimethylbutyl]benzene-1,2-diol	HCZKYJDFEPMADG-UHFFFAOYSA-N	C18H22O4	2.53271	pos	5.55665e+07	184796	5.42914e+07	2.02432e+08
Brachystemidine C	XXNXFWDNPYKFDJ-UHFFFAOYSA-N	C15H18N2O6	0.700734	pos	3.696e+07	2.8388e+06	6.71389e+07	2.00197e+08
Salvianolic acid C	GCJWPRRNLSHTRY-VURDRKPISA-N	C26H20O10	0.451185	neg	2.7204e+07	211913	9.77385e+07	1.94273e+08
Protocatechualdehyde	IBGBGRVKPALMCQ-UHFFFAOYSA-N	C7H6O3	4.39311	neg	9.30427e+07	1.50593e+06	1.01017e+08	1.93396e+08
Fumaric acid	VZCYOOQTPOCHFL-OWOJBTEDSA-N	C4H4O4	0.414918	neg	2.54954e+08	4.13608e+06	1.33364e+08	1.91383e+08
Franklinone	BYDOXMDGHAWVGN-UHFFFAOYSA-N	C19H22O4	1.91103	neg	6.75089e+07	0	8.62984e+07	1.91377e+08
Acetoxyaurapten	HBHAENAAWHAOMI-UHFFFAOYSA-N	C21H24O5	0.993226	neg	3.47465e+06	1.02246e+08	5.30593e+07	1.8905e+08
olean-12-en-28-al-3beta-yl caffeate|Olean-28-al-3??-yl-caffeate	CCZVBQHPIFLVMF-UHFFFAOYSA-N	C39H54O5	2.90729	pos	0	1.41296e+08	1.48174e+08	1.8869e+08
Schistochilic acid C	CDUCXJMEMPCZPY-UHFFFAOYSA-N	C21H32O5	0.65381	pos	2.0478e+06	1.17029e+06	1.08939e+08	1.88209e+08
12-Oxa-9,20-cyclo-9,10-secoabieta-1,5,8,10(20),13-pentene-3,7,11-trione	OCLGUJIAXLMPLM-UHFFFAOYSA-N	C19H18O4	1.49281	pos	1.12991e+08	0	1.48731e+08	1.846e+08
Salidroside	ILRCGYURZSFMEG-RKQHYHRCSA-N	C14H20O7	0.426719	pos	3.16236e+07	2.90563e+06	6.28112e+07	1.81708e+08
dihydrobruceajavanin A	VXQBJZLNZQLKCS-UHFFFAOYSA-N	C34H50O7	1.09679	pos	3388.63	2.44851e+08	2.27944e+08	1.81258e+08
(2S)-1-O-palmitoyl-2-O-palmitoyl-3-O-[alpha-D-galactopyranosyl-(1''->6')-beta-D-galactopyranosyl]glycerol	TUUXXJDESDKYDH-UHFFFAOYSA-N	C47H88O15	2.92341	pos	0	1.81244e+08	1.69446e+08	1.75664e+08
Methyl rosmarinate	XHALVRQBZGZHFE-BBOMDTFKSA-N	C19H18O8	0.299366	neg	9.90485e+07	69101.4	1.03381e+08	1.74876e+08
Isosakuranin	KEEWIHDTSNESJZ-ZJHVPRRPSA-N	C22H24O10	1.34285	neg	1.15447e+08	0	5.81015e+07	1.74356e+08
prugosene C2	YPELKNYMLKTHOB-UHFFFAOYSA-N	C27H36O4	1.74715	neg	122793	1.34268e+08	3.15302e+08	1.73489e+08
Citric acid	KRKNYBCHXYNGOX-UHFFFAOYSA-N	C6H8O7	0.258733	neg	1.29848e+07	9.07933e+06	2.32156e+07	1.72869e+08
marubajalapin V	JKGOWAUSJIKCCO-UHFFFAOYSA-N	C58H102O21	17.1098	pos	0	2.50409e+08	1.91756e+08	1.7182e+08
N-Formylcyclomicrobuxeine	PEGHGSZQFPWEFQ-UHFFFAOYSA-N	C25H35NO2	0.722407	neg	519458	2.15396e+08	1.80213e+08	1.68774e+08
abutiloside I	GFQILTPWOINTFP-UHFFFAOYSA-N	C44H75NO13	1.07063	pos	0	2.97555e+07	8.97506e+06	1.65285e+08
β-Gentiobiose	DLRVVLDZNNYCBX-CQUJWQHSSA-N	C12H22O11	0.90966	pos	1.41438e+08	2.90151e+06	5.80979e+07	1.64865e+08
Tanshinone Iia	HYXITZLLTYIPOF-UHFFFAOYSA-N	C19H18O3	3.61634	pos	4.03189e+08	393528	7.29851e+07	1.64607e+08
Pleurone	AHSQQRNJXRQXFN-UHFFFAOYSA-N	C4H2O4	1.3587	neg	7.12324e+07	6.55063e+06	1.07005e+08	1.63639e+08
2-methyl-3-buten-2-ol beta-D-apiofuranosyl-(1->6)-beta-D-glucopyranoside	BUKBJIBZOCTYLQ-UHFFFAOYSA-N	C16H28O10	0.806536	neg	62755	1.33625e+08	1.12038e+07	1.60952e+08
monolinolein	WECGLUPZRHILCT-HZJYTTRNSA-N	C21H38O4	0.0227977	pos	1.84477e+06	2.45715e+08	2.43119e+08	1.60671e+08
Valine	KZSNJWFQEVHDMF-UHFFFAOYSA-N	C5H11NO2	0.279869	pos	4.08473e+07	2.11181e+08	2.20389e+08	1.60055e+08
Amentoflavone	YUSWMAULDXZHPY-UHFFFAOYSA-N	C30H18O10	2.14701	neg	1.16641e+08	807078	9.42423e+07	1.58614e+08
1-O-acetyl-2-O-[(3R,7R)-3,7-bis(acetyloxy)eicosanoyl]-sn-glycerol	KKSYENZZRSDUAN-UHFFFAOYSA-N	C29H52O9	1.12788	pos	0	1.17993e+08	1.22768e+08	1.58214e+08
Reichsteins substance S	WHBHBVVOGNECLV-UHFFFAOYSA-N	C21H30O4	1.69542	pos	36099	680933	7.07242e+07	1.56834e+08
ANEMARCOUMARIN A	LFZKQNNCOZCLAK-UHFFFAOYSA-N	C16H12O4	0.367393	pos	7.80974e+07	161549	9.10682e+07	1.56634e+08
16xi-Hydroxy-3,4-Dihydroxy-13-cleroden-15,16-olide|3alpha,4beta,16-trihydroxy-5beta,10beta-cis-17alpha,20alpha-cleroda-13(14)-en-15,16-olide	ASJHAZDQDXYITE-UHFFFAOYSA-N	C20H32O5	0.63227	pos	1.21624e+08	5.34456e+06	1.67288e+08	1.56316e+08
1-Kestose	VAWYEUIPHLMNNF-OESPXIITSA-N	C18H32O16	2.07133	pos	1.44012e+07	2.22006e+06	1.27282e+08	1.54711e+08
cyathisterol	UVNYUMXKLUCIGN-UHFFFAOYSA-N	C28H42O2	0.120493	neg	9.89094e+07	1.37794e+08	1.81897e+08	1.52846e+08
Oleamide	FATBGEAMYMYZAF-KTKRTIGZSA-N	C18H35NO	0.123127	pos	4.19727e+09	7.81925e+07	4.03957e+08	1.52384e+08
Dioscin	VNONINPVFQTJOC-ZGXDEBHDSA-N	C45H72O16	1.78164	pos	1.54593e+08	41759.2	9.3037e+07	1.5113e+08
Yemuoside YMI	NQHHQUVEHGBXRA-UHFFFAOYSA-N	C25H30O11	0.249575	neg	8.82609e+07	29012.5	6.62408e+07	1.50212e+08
3beta-trans-sinapoyloxylup-20(29)-en-28-ol|3??-trans-Sinapoyloxylup-20(29)-en-28-ol	FUWIZRPADCCJBJ-UHFFFAOYSA-N	C41H60O6	0.235459	pos	60534.3	1.22453e+08	1.32909e+08	1.48641e+08
anthcolorin E	FHMUMBXUKWMPHG-UHFFFAOYSA-N	C33H49NO4	14.3143	pos	174137	1.06566e+08	1.07374e+08	1.48155e+08
caryolanemagnolol	WDXDAODECHOTPZ-UHFFFAOYSA-N	C33H42O3	0.24885	pos	213746	1.07542e+08	1.13149e+08	1.48119e+08
SCHEMBL898292	IBDVBNUJEGRVQN-UHFFFAOYSA-N	C23H40O4	1.90953	pos	0	1.43562e+08	8.37035e+07	1.47578e+08
Glabrol	CUFAXDWQDQQKFF-UHFFFAOYSA-N	C25H28O4	0.904402	pos	1.0459e+06	3.13337e+07	4.48609e+07	1.47063e+08
H-D-Trp-OH	QIVBCDIJIAJPQS-SECBINFHSA-N	C11H12N2O2	2.27041	pos	6.63238e+07	1.23866e+08	9.01752e+07	1.46553e+08
L-Arginine	ODKSFYDXXFIFQN-BYPYZUCNSA-N	C6H14N4O2	1.53641	pos	8.93604e+07	0	1.05763e+08	1.4549e+08
shanzhiside methyl ester	SCXMMKUKDINSDI-UHFFFAOYSA-N	C18H28O10	0.059028	neg	0	1.41975e+08	1.02761e+08	1.4406e+08
Segetalin A	YVUZOKYOUUCVBV-WJTDBPPMSA-N	C31H43N7O6	2.08269	neg	62762.9	2.03021e+08	1.32296e+08	1.43084e+08
VITEXDOIN B	HWWOGKWMIOQRRX-UHFFFAOYSA-N	C19H16O5	0.737051	pos	7.34144e+07	0	5.83698e+07	1.4275e+08
Canavanine	FSBIGDSBMBYOPN-VKHMYHEASA-N	C5H12N4O3	1.73552	pos	6.24605e+08	9.54202e+06	7.10463e+07	1.41354e+08
Sedoheptulose	HSNZZMHEPUFJNZ-UHFFFAOYSA-N	C7H14O7	0.132263	pos	7.13018e+07	2.2791e+06	8.77901e+07	1.41241e+08
13,15-Diacetoxy-pentadeca-8,10-dien-2,4,6-triin|13,15-diacetoxy-pentadeca-8,10-diene-2,4,6-triyne|Centaur X(1)	CCISAWUQSGDVAV-UHFFFAOYSA-N	C19H20O4	1.72471	pos	7.19421e+06	0	7.34034e+07	1.40672e+08
15alpha-fluorofujenal	WKCZSMWYYNNWGT-UHFFFAOYSA-N	C20H25FO4	1.6022	pos	7.20695e+06	3.31626e+07	4.76694e+07	1.38837e+08
2,5-dihydroxy-3-methanesulfinylbenzyl alcohol	NADRVFUNXRGAII-UHFFFAOYSA-N	C8H10O4S	0.875618	neg	0	1.57768e+08	2.54956e+08	1.3882e+08
Cornutin C	JIGNCSTXCZEUJU-UHFFFAOYSA-N	C20H30O6	3.38213	pos	1.10803e+06	1.0092e+06	6.96511e+07	1.38569e+08
beta-Elemonic acid	XLPAINGDLCDYQV-UHFFFAOYSA-N	C30H46O3	0.66992	pos	7.2255e+07	0	8.3415e+07	1.34707e+08
Theaflavin-3'-gallate	GPLOTACQBREROW-WQLSNUALSA-N	C36H28O16	1.30695	neg	4.73154e+07	0	5.25589e+07	1.32609e+08
Isoastragaloside II	SMZYCXAYGPGYRS-NGTUZWGPSA-N	C43H70O15	0.761381	pos	6.12925e+07	0	4.40981e+07	1.30804e+08
Isovalerylcarnitine	IGQBPDJNUXPEMT-UHFFFAOYSA-N	C12H23NO4	0.594602	pos	1.3983e+06	1.5678e+08	1.58036e+08	1.30632e+08
18beta-succinyloxy-ent-labdan-8beta,15-diol	KKFOXGDCQYTVQD-UHFFFAOYSA-N	C24H42O6	0.974498	pos	36136.3	1.40379e+08	1.4075e+08	1.28239e+08
Erythrodiol 3-caffeate	NPRKWCDSDHHADP-UHFFFAOYSA-N	C39H56O5	2.89806	pos	177479	9.6831e+07	1.04195e+08	1.28117e+08
ankaflavin	ORJQJZWWJUNMQV-UHFFFAOYSA-N	C23H28O5	0.598955	neg	1.43358e+06	6.55515e+07	2.27103e+07	1.27752e+08
Phaseinsaeure	JZYORAMDOXNBOR-UHFFFAOYSA-N	C15H20O5	2.63658	pos	4.14503e+06	2.39689e+06	9.74264e+07	1.26843e+08
3beta-(3',5'-dihydroxyphenyl)-2alpha-(4''-hydroxyphenyl)dihydrobenzofuran-5-carbaldehyde	TYAYDVXOPBERFS-UHFFFAOYSA-N	C21H16O5	1.27855	pos	5.6569e+07	0	7.86502e+07	1.26397e+08
L-Valine	KZSNJWFQEVHDMF-BYPYZUCNSA-N	C5H11NO2	0.243022	pos	9.72065e+06	7.46431e+07	5.10183e+08	1.25804e+08
hesseltin E	GVOVBHJIAABCIL-UHFFFAOYSA-N	C25H32O4	0.743884	neg	94406.3	1.28039e+08	9.61942e+07	1.25564e+08
MALIC ACID	BJEPYKJPYRNKOW-UHFFFAOYSA-N	C4H6O5	3.20368	neg	2.81702e+08	800289	2.30229e+07	1.24726e+08
N-STEAROYL-PHYTOSPHINGOSINE	IEZRNEGTKRQRFV-UHFFFAOYSA-N	C36H73NO4	1.20051	pos	0	1.42086e+08	8.4079e+07	1.23685e+08
Hypomurocin A-5a	HQKYIIGJHSNZAS-UHFFFAOYSA-N	C59H104N12O13	3.88433	pos	0	6.54438e+07	8.25535e+07	1.23556e+08
Polaramycin A	XIMUGTXGMOOAJL-UHFFFAOYSA-N	C55H99N3O18	7.13329	pos	0	1.43896e+08	9.01123e+07	1.22828e+08
2-hydroxy-2-[(4-hydroxyphenyl)methyl]butanedioic Acid	XLGKDRSWPCQYAB-UHFFFAOYSA-N	C11H12O6	1.67216	neg	1.07914e+08	34438.7	4.78852e+07	1.22656e+08
Isomucronulatol 7-O-glucoside	SXHOGLPTLQBGDO-ZVSSUSCDSA-N	C23H28O10	1.30378	neg	8.08201e+07	0	7.00917e+07	1.22369e+08
Ganoderal A	RHNFCIPJKSUUES-AWQFTUOYSA-N	C30H44O2	0.474127	pos	6.11206e+07	76888.2	5.83404e+07	1.20102e+08
L-Carnitine	PHIQHXFUZVPYII-ZCFIWIBFSA-N	C7H15NO3	0.148321	pos	9.12613e+06	2.20854e+08	8.35427e+07	1.19144e+08
Heracleifolinol	MRPSSAZAIPQONH-UHFFFAOYSA-N	C32H50O7	2.07722	pos	0	1.37893e+08	1.55657e+08	1.1873e+08
sagittarioside a	RWOAZASDEROKIH-UHFFFAOYSA-N	C26H44O7	1.03283	pos	100831	1.58919e+08	2.4877e+08	1.16771e+08
CREATINE	CVSVTCORWBXHQV-UHFFFAOYSA-N	C4H9N3O2	3.3827	pos	1.17256e+07	1.26703e+08	7.57652e+07	1.15674e+08
judaicin (eudesmane naphthofuran)	NGPDZEACIWDCKX-WUDKWMPASA-N	C15H20O4	1.17378	pos	1.76244e+08	0	5.86968e+07	1.14483e+08
Glycitein	DXYUAIFZCFRPTH-UHFFFAOYSA-N	C16H12O5	0.538188	pos	1.01359e+08	0	1.05824e+08	1.14443e+08
6,8-dihydroxy-4-methyl-7 h-benz(de) anthracen-7-one	VFNQCHNKEGIWSX-UHFFFAOYSA-N	C18H12O3	1.52573	pos	9.35619e+07	0	3.985e+07	1.13913e+08
2-Isopropylmalic acid	BITYXLXUCSKTJS-ZETCQYMHSA-N	C7H12O5	0.818989	neg	1.34827e+08	0	7.73017e+07	1.12613e+08
3beta-benzoyl-D:A-friedo-oleanan-27,16alpha-lactone	JIDJJOHBVVWALI-UHFFFAOYSA-N	C37H52O4	0.229561	pos	223128	7.67572e+07	8.2312e+07	1.12277e+08
OXOPROLINE	ODHCTXKNWHHXJC-UHFFFAOYSA-N	C5H7NO3	3.45666	neg	4.75828e+07	3.42325e+07	6.70702e+07	1.12033e+08
BELLADONNINE	GERIGMSHTUAXSI-UHFFFAOYSA-N	C34H42N2O4	0.701852	pos	66956.5	1.03026e+08	1.35025e+08	1.11e+08
7-deacetyl-7-angeloyl-6alpha-hydroxyazadiradione	VTMNZBMBSIFZGN-UHFFFAOYSA-N	C31H38O6	1.71015	pos	67244.7	9.03615e+07	7.00575e+07	1.10538e+08
Maleic acid	VZCYOOQTPOCHFL-UPHRSURJSA-N	C4H4O4	0.521608	neg	7.5105e+07	3.3715e+06	6.911e+07	1.09759e+08
agnuside	GLACGTLACKLUJX-QNAXTHAFSA-N	C22H26O11	2.38701	pos	6.47837e+07	0	6.66769e+07	1.09589e+08
2alpha-(3-angeloyloxy-2-hydroxy-2-methyl butyryloxy)-labd-7-en-15-oic acid|2alpha-<3-angeloyloxy-2-hydroxy-2-methyl butyryloxy>-labd-7-en-15-oic acid	IEWPUDRMTVALDE-UHFFFAOYSA-N	C30H48O7	0.888011	pos	13325.6	1.84691e+08	1.62937e+08	1.08685e+08
Cucubalactam	MYQDESNANFPZON-UHFFFAOYSA-N	C10H17NO3	0.268723	pos	1.9349e+08	762412	6.12023e+07	1.07962e+08
3-hydroxy-1,5-dioxacyclohenicosane-6,21-dione	CGRXXYHVIMAIGM-UHFFFAOYSA-N	C19H34O5	1.12325	neg	0	31717.1	3.0721e+07	1.07507e+08
4beta,9alpha-dihydroxy-13alpha-hexadecanoate-20-dodecanoate-1,6-tigliadien-3-one	RFRBIYAWVMLBNO-UHFFFAOYSA-N	C48H80O7	5.29857	pos	450189	1.01455e+08	1.58208e+08	1.06864e+08
Docosapentaenoic acid (22n-3)	YUFFSWGQGVEMMI-JLNKQSITSA-N	C22H34O2	2.63784	neg	5766.39	1.20753e+08	9.84116e+07	1.06525e+08
PILOSIN A	MAFFAPOMVRVAEP-UHFFFAOYSA-N	C26H48O6	0.50548	pos	978247	7.94029e+07	8.29251e+07	1.05635e+08
5-Hydroxy-4-hydroxymethyl-2-propyl-1,3-dioxane	RYJRBBKILQAOIA-UHFFFAOYSA-N	C8H16O4	0.280904	neg	5.70087e+07	0	6.24671e+07	1.05444e+08
(5S,7S,8S,9R)-7,8-dihydroxy-Delta4,11dihyronepeta-1,3-diol|jatamanin J	ZHKYTTFZXBSTEE-UHFFFAOYSA-N	C10H18O4	3.48773	pos	126098	0	6.51531e+07	1.05152e+08
rel-(4S,6S,9S,10S,Z)-4,6,9-trihydroxy-10-nonyl-3,4,5,6,9,10-hexahydro-oxecin-2-one	HFGOXJHLMBNOHC-UHFFFAOYSA-N	C18H32O5	1.17772	neg	9.05442e+07	279684	3.74803e+07	1.04814e+08
Myristoylcarnitine	PSHXNVGSVNEJBD-UHFFFAOYSA-N	C21H41NO4	0.61789	pos	251137	1.32466e+08	1.01543e+08	1.04797e+08
(3S,5S,8R,9R,10S,13S,16R)-3-acetoxy-9,13;15,16-diepoxy-labdan-16-ol|negundoin E	HMOXCWRBEBNJEN-UHFFFAOYSA-N	C22H36O5	0.9071	pos	62286.6	7.03858e+06	1.45563e+08	1.04538e+08
7-[(2E)-5-hydroxy-3,7-dimethylocta-2,6-dienoxy]chromen-2-one [IIN-based on: CCMSLIB00000848851]	VNADFOGBKXRWGC-RIYZIHGNSA-N	C19H22O4	2.19476	pos	2.6284e+07	8763.2	5.51812e+07	1.04056e+08
19-Hydroxygaleopsin	CJAPKANNYVSMFT-UHFFFAOYSA-N	C22H32O6	2.39752	neg	449956	1.57659e+08	8.92167e+07	1.02351e+08
Axillarine C	PUFTXDSOJLKZCI-UHFFFAOYSA-N	C32H48N2O4	1.95251	pos	132688	1.23244e+08	1.19932e+08	1.02023e+08
12'-Apo-b-carotene-3,12'-diol	XVQDCCGQSOTQBN-RXCALXPUSA-N	C25H36O2	0.179993	pos	12708.2	1.22325e+08	1.63427e+08	1.0199e+08
SCHEMBL14510825	BJAYKFMSRRFYLE-UHFFFAOYSA-N	C21H32O2	1.37575	pos	0	7.90792e+07	1.06909e+08	1.01973e+08
9alpha-(Isobutyryloxy)-7beta-(2-methylacryloyloxy)longipinen-1-on	ZHLWRBQVALREFH-UHFFFAOYSA-N	C23H32O5	0.998248	neg	0	1.31029e+08	7.55936e+07	1.01599e+08
Chikusetsusaponin IVa methyl ester	XPORLJWHBRUXGD-UHFFFAOYSA-N	C43H68O14	18.5731	pos	673768	4.21834e+07	6.09708e+07	1.01467e+08
salviaflaside	DSMWJDJWYGMEBO-PRFRQLEPSA-N	C24H26O13	0.697283	pos	7.37531e+07	145805	8.2678e+07	9.93402e+07
ACMC-20moqd	WRYXIZJRAKUGEP-UHFFFAOYSA-N	C19H22O4	0.950455	pos	4.02419e+07	3.22183e+06	4.68651e+07	9.91781e+07
passifloricin C	RDGZXVIPYWJQBR-UHFFFAOYSA-N	C28H52O7	0.765953	pos	2.51854e+06	7.16447e+07	7.38353e+07	9.54175e+07
Phthalic acid mono-2-ethylhexyl ester	DJDSLBVSSOQSLW-UHFFFAOYSA-N	C16H22O4	0.956228	neg	260963	2.48531e+07	5.45385e+07	9.53964e+07
4-Acetylbutyrate	MGTZCLMLSSAXLD-UHFFFAOYSA-N	C6H10O3	0.71611	neg	0	2.51638e+07	5.12673e+07	9.4622e+07
Ingol	MXSMLDVUIRKKID-UHFFFAOYSA-N	C20H30O6	0.259438	pos	2.75152e+08	908326	9.15204e+07	9.43786e+07
8-(2-hydroxy-3-methylbut-3-enyl)-7-methoxychromen-2-one [IIN-based on: CCMSLIB00000847740]	SQSRYWNOKPJENY-UHFFFAOYSA-N	C15H16O4	1.43118	pos	1.12438e+08	29014.4	4.18431e+07	9.42328e+07
BIS(2-ETHYLHEXYL)PHTHALATE	BJQHLKABXJIVAM-UHFFFAOYSA-N	C24H38O4	0.663574	pos	0	3.82083e+07	5.39615e+07	9.37464e+07
(Z)-4-methoxy-4-oxobut-2-enoic acid	NKHAVTQWNUWKEO-UHFFFAOYSA-N	C5H6O4	3.21634	neg	4.4892e+07	1.30349e+07	5.98255e+07	9.33176e+07
Caffeoylcycloartenol	QKNCKSQAXGWPIK-FOWTUZBSSA-N	C39H56O4	2.08072	pos	1.55319e+06	6.56717e+07	7.73423e+07	9.31243e+07
3-O-beta-D-galactopyranosyl-(1->3)<alpha-L-rhamnopyranosyl(1->2))-beta-D-glucopyranosylhederagenin|3-O-beta-D-galactopyranosyl-(1->3)[alpha-L-rhamnopyranosyl(1->2))-beta-D-glucopyranosylhederagenin	GNMYBPAGSLLGSK-UHFFFAOYSA-N	C48H78O18	1.37031	neg	4.3296e+07	45251.6	4.17147e+07	9.24302e+07
2-Pyrrolidineacetic acid	ADSALMJPJUKESW-UHFFFAOYSA-N	C6H11NO2	0.603104	pos	1.89539e+07	1.64101e+06	1.48988e+08	9.19999e+07
Dehydroascorbic acid	SBJKKFFYIZUCET-DUZGATOHSA-N	C6H6O6	2.99295	neg	7.35987e+07	5.1561e+07	9.52391e+07	9.15209e+07
dibenzothiophene	IYYZUPMFVPLQIF-UHFFFAOYSA-N	C12H8S	1.57941	pos	411621	4.9076e+06	8.942e+07	9.1218e+07
Astragaloside II	AYWNHWGQTMCQIV-PENCHUSISA-N	C43H70O15	0.893247	pos	8.15757e+07	458250	5.27351e+07	8.88414e+07
3-Hydroxytanshinone IIB	PTDFDQOICMYXKP-UHFFFAOYSA-N	C19H18O5	1.20874	pos	3.39686e+07	0	3.87519e+07	8.86929e+07
Anolignan A	HFSAUGRJONZEDN-UHFFFAOYSA-N	C19H18O4	1.16007	pos	1.3913e+07	470680	2.83056e+07	8.82175e+07
(3beta,4alpha,16alpha)-3-{{O-beta-D-galactopyranosyl-(1->2)-O-[beta-D-xylopyranosyl-(1->3)]-beta-D-glucopyranosyl}oxy}-16-hydroxy-23-oxoolean-12-en-28-oic acid methyl ester|3-{{O-beta-D-galactopyranosyl-(1->2)-O-[beta-D-xylopyranosyl-(1->3)]-beta-D-glucopyranosyl}oxy}quillaic acid methyl ester	RMAKESVZXWWPDL-UHFFFAOYSA-N	C48H76O19	0.535052	neg	4.44556e+07	0	3.55139e+07	8.81668e+07
Isoketochabrolic acid	QIMVLWYRLMXOML-UHFFFAOYSA-N	C18H28O3	0.56321	pos	2.41796e+07	892178	1.26088e+07	8.7637e+07
(4S,5S,7R,10S)-Eudesm-11-en-4-ol 2'-O-((2S) 2-methylbutyryl)-beta-D-fucopyranoside|(4S,5S,7R,10S)-Eudesm-11-en-4-ol 2'-O-<(2S) 2-methylbutyryl>-beta-D-fucopyranoside	MWIIJKQLNNDGLP-UHFFFAOYSA-N	C26H44O6	0.276741	pos	0	5.03379e+07	3.1226e+07	8.61408e+07
Dimethyl lithospermate B	DHYLGBJCEGEBGQ-UHFFFAOYSA-N	C38H34O16	2.60236	neg	0	0	7.14455e+07	8.60282e+07
Salvianolic acid B	SNKFFCBZYFGCQN-UHFFFAOYSA-N	C36H30O16	2.86532	pos	6.73908e+07	64963.7	6.63594e+07	8.53196e+07
isobutylmalic acid	AOJRRQNPQBDATA-UHFFFAOYSA-N	C8H14O5	1.53199	neg	3.20376e+07	16251.1	3.96504e+07	8.45483e+07
Danshensu	PAFLSMZLRSPALU-MRVPVSSYSA-N	C9H10O5	1.86923	neg	3.50494e+07	1.74513e+06	4.64438e+07	8.40812e+07
5-methoxy-11.14-dioxo-abiata-8,12,15-triene|bractealine	AKIVFXSJXSNFJH-UHFFFAOYSA-N	C21H28O4	0.973722	pos	1.33766e+06	17668.6	4.3188e+07	8.18978e+07
Undecanedioic acid	LWBHHRRTOZQPDM-UHFFFAOYSA-N	C11H20O4	1.18117	pos	351589	0	5.87169e+07	8.18312e+07
9,10-DIHYDROXY-8-OXOOCTADEC-12-ENOIC ACID	NIOKCFABUMZUDL-UHFFFAOYSA-N	C18H32O5	1.40285	neg	6.36885e+07	710452	1.20958e+07	8.16066e+07
N-Acetyldopamine	OFSAJYZMIPNPHE-UHFFFAOYSA-N	C10H13NO3	1.58012	neg	6.74729e+07	7.34147e+07	7.56988e+07	8.15718e+07
Sinocrassoside D1	FFERJMKECZZBSZ-UHFFFAOYSA-N	C26H28O13	2.63593	pos	5.33906e+07	10887.9	2.15477e+07	8.10827e+07
Sucrose	CZMRCDWAGMRECN-UGDNZRGBSA-N	C12H22O11	0.982167	neg	1.89058e+09	2.28383e+06	4.54631e+07	8.05176e+07
Cyclopassifloside X	AJYLEJBHVLQJTI-UHFFFAOYSA-N	C37H62O12	0.519146	neg	7.04964e+06	42485.6	1.4253e+08	8.01607e+07
D:C-friedo-oleana-7,9(11)-diene-3alpha,29-diol 3-benzoate|karounidiol 3-benzoate|Karounidiol 3-o-benzoate|multiflora-7,9(11)-diene-3alpha,29-diol 3-benzoate	QTSNHJFHQLIOGA-UHFFFAOYSA-N	C37H52O3	0.877653	pos	1.55696e+06	6.13062e+07	6.68063e+07	7.93013e+07
Creoside I	DNUPSKJMHPRNPH-UHFFFAOYSA-N	C14H24O7	0.1342	pos	3.10155e+06	3.30784e+07	4.49958e+07	7.87674e+07
Neodunol	UUDOMPYHVUEXEE-UHFFFAOYSA-N	C17H12O4	0.469452	pos	2.24493e+06	594473	5.81139e+07	7.82312e+07
L-2-Hydroxyglutaric acid	HWXBTNAVRSUOJR-VKHMYHEASA-N	C5H8O5	0.289537	pos	0	1.33586e+06	6.45383e+07	7.78755e+07
Feretoside	WSGPLSDARZNMCW-LPGRTNKPSA-N	C17H24O11	12.9426	neg	3.80242e+07	3.71283e+06	4.10075e+07	7.77454e+07
(+)-12beta,17-epoxyemericella-3E,7E,22-trien-16-al|emericellene A	CFTIGVMTUOJNLU-UHFFFAOYSA-N	C25H38O2	1.32023	pos	4524.74	2.36184e+07	5.5517e+07	7.73752e+07
stemoxazolidinone E	ZRPFHBLJEQEGMA-UHFFFAOYSA-N	C23H32N2O6	0.637078	pos	1.40663e+06	1.16396e+08	1.11334e+08	7.71574e+07
5-O-Methylgenistein 7-O-glucoside	KSVVGBSBNPMXJF-UHFFFAOYSA-N	C22H22O10	0.918108	pos	2.40968e+07	284877	5.00195e+07	7.67687e+07
Helioscopinolide E	JFINBCWMRIJTDN-UHFFFAOYSA-N	C20H26O3	0.376076	pos	492114	2.3178e+06	3.05336e+07	7.66679e+07
Linamarin	QLTCHMYAEJEXBT-ZEBDFXRSSA-N	C10H17NO6	1.00883	pos	768322	273269	5.53429e+07	7.65384e+07
(3Z,11Z,7S*,9S*,10R*)-9-acetoxy-6,13-dichloro-7:10-epoxypentadeca-3,11-dien-1-yne	VFEVOEOMQSLWCB-UHFFFAOYSA-N	C17H22Cl2O3	3.04292	neg	1.29092e+07	5.20146e+07	4.00579e+07	7.59619e+07
Acetylcarnitine	RDHQFKQIGNGIED-MRVPVSSYSA-O	C9H18NO4	2.07002	pos	3.17037e+06	4.19098e+08	1.25131e+08	7.49686e+07
Cochinchinenene A	IEXCFHSPKFFVGU-UHFFFAOYSA-N	C33H34O6	1.24812	neg	708017	6.78204e+07	6.10532e+07	7.40106e+07
5,7,4'-trihydroxy-4-styrylcoumarin	QZYJYWPBQCRMEZ-UHFFFAOYSA-N	C17H12O5	0.370805	neg	4.02429e+07	79964.6	4.42626e+07	7.37424e+07
Dihydro-Jasmonic acid (dh-JA)	PQEYTAGBXNEUQL-UHFFFAOYSA-N	C12H20O3	1.03342	pos	6.43335e+07	456444	2.37036e+07	7.34098e+07
1,28-Octacosanediol diferulate	BNCYSRWQCKLMQU-QUTRQNJUSA-N	C48H74O8	0.822028	pos	565566	9.40524e+07	1.02856e+08	7.26077e+07
isocowanin	ZOXSAWIMDZFTJC-UHFFFAOYSA-N	C29H34O6	1.15153	neg	1.51007e+06	1.29218e+08	1.21813e+08	7.24576e+07
velutin	ROCUOVBWAWAQFD-UHFFFAOYSA-N	C17H14O6	1.44714	pos	3.0159e+07	280361	3.83466e+07	7.21948e+07
18-Acetoxy-leucanthol|18-acetylleucanthol|ent-3beta,7alpha,15-trihydroxy-18-acetoxykaur-18-ene	NRNGDSRHDCUDMG-UHFFFAOYSA-N	C22H34O5	2.46855	pos	67972.9	659517	9.76989e+07	7.155e+07
Neocryptotanshinone	LGZFJHSOBYVDLA-UHFFFAOYSA-N	C19H22O4	2.00813	neg	1.85082e+07	0	3.47402e+07	7.1542e+07
SCHEMBL7627853	WLUANEBAAWEMAJ-UHFFFAOYSA-N	C23H20O12	0.25972	neg	2.38432e+07	2.57662e+06	3.79435e+07	7.13421e+07
Przewaquinone B	CETREAVXUDHZGK-UHFFFAOYSA-N	C18H12O4	0.188702	neg	55500.9	2.9027e+07	4.76278e+07	7.11578e+07
D-(+)-Melezitose	QWIZNVHXZXRPDR-WSCXOGSTSA-N	C18H32O16	0.739541	pos	3.54609e+07	2.49995e+06	6.38261e+07	7.11169e+07
11,12-di-O-acetyl-17beta-marsdenin	ADRVGPUVQBLXQW-UHFFFAOYSA-N	C25H36O8	15.7982	pos	1.72559e+06	113985	5.41083e+07	7.09892e+07
(23E)-cucurbita-5,23,25-triene-3,7-dione	OTTWFQZLWJURAW-UHFFFAOYSA-N	C30H44O2	0.190287	pos	2.53025e+07	56096	2.63331e+07	7.09709e+07
Gancaonin C	YGCCASGFIOIXIN-UHFFFAOYSA-N	C20H18O5	1.65525	pos	5.52813e+07	0	3.60943e+07	7.02194e+07
NSC629155	KHQNSSJNIXVKMK-UHFFFAOYSA-N	C20H30O5	0.597623	pos	6.57503e+07	571340	2.78366e+07	6.96642e+07
[(1aS,1bS,2S,5aR,6S,6aS)-1a-(hydroxymethyl)-2-[(2S,3R,4S,5S,6R)-3,4,5-trihydroxy-6-(hydroxymethyl)oxan-2-yl]oxy-2,5a,6,6a-tetrahydro-1bH-oxireno[5,6]cyclopenta[1,3-c]pyran-6-yl] benzoate	GOHHRVCULPSXEU-RWORTQBESA-N	C22H26O11	1.73495	pos	3.84929e+07	0	4.7257e+07	6.7738e+07
Isomucronulatol	NQRBAPDEZYMKFL-UHFFFAOYSA-N	C17H18O5	0.554658	pos	4.12917e+07	52823.5	3.13512e+07	6.75959e+07
Salannic acid	QMEMRUDWBPMCGJ-UHFFFAOYSA-N	C26H34O7	0.0577413	neg	0	2.19453e+07	9.0454e+06	6.68082e+07
Variecolol	KKLLBIFNYVWKON-UHFFFAOYSA-N	C25H38O2	1.66955	pos	0	5.58536e+06	8.30899e+06	6.65317e+07
D-Ribulose 5-phosphate	FNZLKVNUWIIPSJ-UHNVWZDZSA-N	C5H11O8P	0.478231	pos	3.9967e+07	64636.5	4.09091e+07	6.53866e+07
Reticulataxanthin	JNRFHJQRIUJTNO-DBTGPYIJSA-N	C33H44O2	1.79521	pos	635992	5.01621e+07	5.26507e+07	6.52265e+07
Dioscoretine	YWVYEZNFPRWGMM-UHFFFAOYSA-N	C13H23NO3	0.545902	pos	3.25261e+07	20143.1	3.27456e+07	6.47597e+07
1-Methoxyspirobrassinin	HXTLALYTXJCGLD-UHFFFAOYSA-N	C12H12N2O2S2	0.865448	pos	3.31014e+07	0	3.69276e+07	6.46308e+07
15,16-epoxy-12-oxo-8(17),13(16),14-ent-labdatrien-20,19-olide	MMJRZYRMOZZOKA-UHFFFAOYSA-N	C20H24O4	1.96391	neg	3.31672e+07	1.20878e+06	2.23362e+07	6.44839e+07
9,17-Octadecadiene-12,14-diyne-1,11,16-triol	MLGPZCOVWKAPPH-UHFFFAOYSA-N	C18H26O3	1.28352	pos	2.45896e+07	1.24404e+06	2.66065e+07	6.43262e+07
14-Methylene-1,3,5,10-prenylbisabolatetraene|9-(15,16-dihydro-15-methylenegeranyl)-p-cymene	UBBKTKSNNRMAPA-UHFFFAOYSA-N	C21H32	1.90789	neg	68671.5	7.45312e+07	5.27547e+07	6.42397e+07
DL-Pantolactone	SERHXTVXHNVDKA-UHFFFAOYSA-N	C6H10O3	0.752113	neg	0	1.0021e+07	2.88955e+07	6.4034e+07
2-(3-Methoxy-4-hydroxyphenethyl)-6-methoxychromone	RKQVUUSDXYBSJQ-UHFFFAOYSA-N	C19H18O5	2.71502	neg	2.57132e+07	0	2.69597e+07	6.3952e+07
6-beta-D-glucopyranosyloxybenzoxazolin-2(3H)-one	BCWUFYWJGPPYJP-UHFFFAOYSA-N	C13H15NO8	1.72789	pos	2.87267e+06	441730	3.393e+07	6.36403e+07
Biliverdin	RCNSAJSGRJSBKK-NSQVQWHSSA-N	C33H34N4O6	1.57088	pos	0	1.03182e+08	3.62021e+07	6.33994e+07
17-acetoxy-4-deoxyphorbol 12,13-bis(isobutyrate)	IADCEPPDLBTECH-UHFFFAOYSA-N	C30H42O9	2.73669	pos	76339.6	1.07261e+08	1.07806e+08	6.3275e+07
20-alpha-hydroxyscutione	SCPWRAAPJZSMPZ-UHFFFAOYSA-N	C28H34O4	1.69533	pos	599791	8.01216e+07	1.0469e+08	6.32422e+07
Gallicynoic acid F	DTCUTCQYZMBUDK-UHFFFAOYSA-N	C18H32O6	0.510998	neg	3.25848e+07	284716	2.36271e+07	6.3115e+07
Methuyl tanshinonate	YFDKIHAZVQFLRC-UHFFFAOYSA-N	C20H18O5	1.23211	pos	3.76412e+07	0	2.80268e+07	6.30002e+07
ISOPALMITIC ACID	ZONJATNKKGGVSU-UHFFFAOYSA-N	C16H32O2	2.29287	pos	2.80701e+07	1.22958e+06	2.6846e+07	6.2723e+07
polygalacerebroside	CDRUYXCOLRASFI-UHFFFAOYSA-N	C40H77NO10	2.47313	pos	93643.5	1.05719e+08	1.31867e+08	6.24447e+07
2-hydroxyteuscorolide|2alpha-Hydroxyteuscorolide	CFHHDFAUABSBHT-UHFFFAOYSA-N	C19H18O6	0.290966	neg	2.86905e+07	412213	3.30618e+07	6.22247e+07
Sodium Deoxycholate	KXGVEGMKQFWNSR-OHAQSFBXSA-N	C24H40O4	0.43512	neg	74429.8	5.36174e+07	5.03153e+06	6.21577e+07
6-allyl-3',8-dimethoxyflavan-3,4'-diol|tulsinol A	WGFNRTMBWBECCH-UHFFFAOYSA-N	C20H22O5	0.0135297	pos	3.76554e+07	57365	2.64102e+07	6.19051e+07
isoferulic acid	QURCVMIEKCOAJU-HWKANZROSA-N	C10H10O4	0.291423	neg	2.61384e+07	499062	4.56144e+07	6.10904e+07
Brunfelsamidine	XVEVWOAHSYZRQE-UHFFFAOYSA-N	C5H7N3	0.259136	pos	2.62792e+07	1.17704e+08	1.41144e+08	6.00656e+07
Chenodeoxycholic acid	RUDATBOHQWOJDD-BSWAIDMHSA-N	C24H40O4	0.627908	neg	1.47629e+06	3.94738e+07	2.86369e+07	5.9707e+07
(R)-4-O-beta-D-glucopyranosyl-4-hydroxy-2-pentanone	PGZALFYZAFKNTP-UHFFFAOYSA-N	C11H20O7	0.954103	neg	655170	8.72539e+07	3.57001e+07	5.96196e+07
hemsleyanoside F	JYHKRXOVGPPGFZ-UHFFFAOYSA-N	C34H32O12	2.32705	pos	0	4.65783e+07	5.34403e+07	5.95687e+07
Tyrosine	OUYCCCASQSFEME-QMMMGPOBSA-N	C9H11NO3	1.60857	pos	2.65626e+07	6.25047e+07	5.17283e+07	5.92128e+07
bicycloalternarene B	GNNBTXNIZDKENT-UHFFFAOYSA-N	C21H34O6	1.98744	pos	816120	66039.6	4.322e+07	5.88852e+07
Tenual	CREMPVZYABCSKM-UHFFFAOYSA-N	C14H14O4	1.46036	pos	2.33035e+07	123021	2.91559e+07	5.87363e+07
METHYL NICOTINIC ACID	YNBADRVTZLEFNH-UHFFFAOYSA-N	C7H7NO2	3.05089	pos	4.53313e+07	2.31977e+06	2.65093e+07	5.86378e+07
Biochanin A	WUADCCWRTIWANL-UHFFFAOYSA-N	C16H12O5	1.9905	pos	7.10013e+06	1.57798e+06	5.5383e+07	5.7657e+07
methyl 13-oxo-9,11-octadecadienoate	HUDBAHZLUKDZOP-UHFFFAOYSA-N	C19H32O3	1.43378	pos	26220.7	553414	3.7444e+07	5.73375e+07
14, 15-Di-Ac-8, 13-Epoxy-11, 14, 15-labdnetriol	GCXYZMBESPRGQQ-UHFFFAOYSA-N	C24H40O6	1.13853	pos	0	6.12633e+07	6.14932e+07	5.72196e+07
ent-19-nor-4,16,18-trihydroxy-8(14)-pimaren-15-one	MLILHESQKRQFGI-UHFFFAOYSA-N	C19H30O4	0.860243	pos	0	105132	1.74626e+07	5.68219e+07
Eicosapentaenoic acid	JAZBEHYOTPTENJ-JLNKQSITSA-N	C20H30O2	0.678859	neg	0	5.82373e+07	4.2295e+07	5.6779e+07
Zinangustolide	GVSRLFWWDZXDPH-UHFFFAOYSA-N	C20H30O6	1.78207	pos	6.87495e+07	0	2.01659e+07	5.65934e+07
2-ethoxycarbonyl-1-hydroxyanthraquinone	FFNRJZVSUQXXOQ-UHFFFAOYSA-N	C17H12O5	0.207273	neg	3.56266e+07	0	3.43735e+07	5.65212e+07
8-Gingerol;8-GINGEROL	BCIWKKMTBRYQJU-INIZCTEOSA-N	C19H30O4	0.215203	pos	18412.7	422949	2.15348e+07	5.64177e+07
plocin	BFEPSODXUYTNMC-UHFFFAOYSA-N	C49H66O13	0.460643	neg	2.84251e+07	0	3.17631e+07	5.62086e+07
methyl labdanolate	QKIXPDCJWBLNDB-UHFFFAOYSA-N	C21H36O3	0.209404	pos	746923	8.29246e+07	1.14971e+08	5.61768e+07
11,12-Epoxypetasol	FRZRBHNGEJTFDA-UHFFFAOYSA-N	C15H22O3	1.5622	pos	420824	4.84176e+07	3.73872e+07	5.61426e+07
PC(16:0/0:0)	ASWBNKHCZGQVJV-UHFFFAOYSA-N	C24H50NO7P	16.84	pos	0	8.70089e+07	1.02739e+08	5.55865e+07
SCHEMBL6507566	XFXXIWXKQFLSOS-UHFFFAOYSA-N	C19H36O5	0.00684595	neg	4.01582e+06	1.08003e+06	5.15045e+07	5.53403e+07
HIPPURATE	QIAFMBKCNZACKA-UHFFFAOYSA-N	C9H9NO3	1.22144	neg	1.93717e+07	7.133e+07	1.07271e+08	5.49746e+07
Andrographic acid	IMDVHFGRDJPERC-UHFFFAOYSA-N	C20H28O6	0.159488	pos	6.91503e+07	428828	2.68871e+07	5.48074e+07
LEVULINIC ACID	JOOXCMJARBKPKM-UHFFFAOYSA-N	C5H8O3	1.99757	neg	9.02752e+07	2.00486e+06	3.17498e+07	5.47323e+07
10-OXODEC-8-ENOIC ACID	YUAQBOMIASXPQW-UHFFFAOYSA-N	C10H16O3	0.932824	pos	523457	213969	2.9904e+07	5.46435e+07
(1Z,2E,4E)-5-(2,4-Hexadienylidene)-5,6-dihydro-2-oxo-2H-pyran-3-propanoic acid	ACFXHMLFZGREFW-UHFFFAOYSA-N	C14H16O4	0.0359077	neg	1.45344e+07	33068.7	2.52985e+07	5.42509e+07
Daedaleaside B	IKPJJKUNGRXSOG-UHFFFAOYSA-N	C39H58O10	0.306363	pos	2.59521e+07	10113.7	7.57408e+07	5.42442e+07
1,4,5-Naphthalenetriol	NHEVNUARLCWEED-UHFFFAOYSA-N	C10H8O3	2.71672	pos	2.99267e+07	336366	2.86192e+07	5.41195e+07
Arthogalin	DITDIPISKFIWSR-UHFFFAOYSA-N	C24H34N2O6	3.02062	pos	755463	4.11682e+07	4.67107e+07	5.40967e+07
Hexanoylcarnitine	VVPRQWTYSNDTEA-UHFFFAOYSA-N	C13H25NO4	1.62113	pos	147697	4.94608e+07	4.03416e+07	5.3557e+07
5,7-dihydroxy-2-(4-hydroxyphenyl)-6-[3,4,5-trihydroxy-6-(hydroxymethyl)oxan-2-yl]-4H-chromen-4-one	MYXNWGACZJSMBT-UHFFFAOYSA-N	C21H20O10	0.757122	neg	801096	361833	2.98653e+07	5.32998e+07
5-Hydroxymethylfurfural	NOEGNKMFWQHSLB-UHFFFAOYSA-N	C6H6O3	1.72561	pos	9.83745e+06	1.71325e+06	1.63351e+08	5.31012e+07
roseanoic acid	SDGNQRWQQDYLDL-UHFFFAOYSA-N	C11H8O4	0.319279	pos	3.32592e+07	8841.01	3.3346e+07	5.28938e+07
Heptadecanoic acid	KEMQGTRYUADPNZ-UHFFFAOYSA-N	C17H34O2	0.456555	pos	0	4.89317e+07	8.17372e+07	5.28541e+07
Tectorigenin	OBBCRPUNCUPUOS-UHFFFAOYSA-N	C16H12O6	1.22224	neg	3.53653e+07	1.07431e+06	3.04076e+07	5.25718e+07
(2S,13R)-2,13-dihydroxy-1(10),14-ent-halimadien-18-oic acid	FGKUISKCUDFGTR-UHFFFAOYSA-N	C20H32O4	0.642986	pos	5.67407e+06	9.86323e+06	3.31383e+07	5.20759e+07
Koparin	SMOFGXHPWCTYQD-UHFFFAOYSA-N	C16H12O6	0.601302	pos	2.58256e+07	580458	2.4259e+07	5.1543e+07
Traumatic Acid	MAZWDMBCPDUFDJ-VQHVLOKHSA-N	C12H20O4	1.50883	neg	3.26229e+07	414626	2.25914e+07	5.12919e+07
Furyl hydroxymethyl ketone	RSZZMVPSHLKFQY-UHFFFAOYSA-N	C6H6O3	1.46842	pos	1.75376e+07	1.13568e+07	7.87812e+07	5.10453e+07
2,4,5-Trimethoxybenzoic acid	KVZUCOGWKYOPID-UHFFFAOYSA-N	C10H12O5	0.761478	neg	204369	21843.2	4.04615e+07	5.0947e+07
Steenkrotin A	XKHKWWYWWNXZDZ-UHFFFAOYSA-N	C20H26O4	2.7396	pos	4.93792e+07	1.81789e+06	2.04873e+07	5.09399e+07
4-Hydroxybenzenesulfonic acid	FEPBITJSIHRMRT-UHFFFAOYSA-N	C6H6O4S	1.19265	neg	2.10701e+07	2.20608e+07	9.87853e+06	5.09065e+07
inundoside-F	YZQIFKLWKKIFBP-UHFFFAOYSA-N	C44H64O8	0.25156	pos	0	3.52942e+07	4.6309e+07	5.08748e+07
Hypoletin 8-gentiobioside	AQHGCHUVXUMKOP-UHFFFAOYSA-N	C27H30O17	1.77789	pos	641347	3.00009e+07	4.29671e+07	5.07786e+07
Chuanxiongol	MPUFGOPEVKRAGE-UHFFFAOYSA-N	C13H14O3	1.1391	pos	5.51986e+06	0	3.20684e+07	5.06881e+07
HAGININ A	JGINXZCTOGQYKS-UHFFFAOYSA-N	C17H16O5	8.80718	pos	2.42542e+07	573323	2.25449e+07	5.06739e+07
6-Ethyl-2-hydroxymethyl-3,4-piperidinediol	QWEWPBRDYZVGBR-UHFFFAOYSA-N	C8H17NO3	56.0823	pos	3.23487e+07	870465	1.60632e+06	5.05494e+07
Glutamylglycine	ACIJGUBIMXQCMF-UHFFFAOYSA-N	C7H12N2O5	2.44241	pos	4.32416e+07	1.70011e+07	2.51858e+07	5.00628e+07
anthcolorin C	QWTTYYHQARGNPV-UHFFFAOYSA-N	C33H47NO3	0.983655	pos	37129.4	4.82616e+07	4.1421e+07	4.95966e+07
10alpha,19-dihydroxy-15,16-epoxy-8(17),13(16),14-nor-ent-labdatriene|10??,19-Dihydroxy-15,16-epoxy-8(17),13(16),14-nor-ent-labdatriene	GHWVPMFSXMFAIQ-UHFFFAOYSA-N	C19H28O3	2.78722	pos	145545	1.98857e+07	4.40589e+07	4.95375e+07
methyl-5,11,14,17-eicosatetraenoate	RACNRUFXUGWSBR-UHFFFAOYSA-N	C21H34O2	0.632093	pos	0	3.46566e+07	4.36368e+07	4.94141e+07
Arnicolide D	NZESEVTYUVXOTC-APDQSUQKSA-N	C19H24O5	1.97307	pos	472956	49903.2	2.63972e+07	4.92904e+07
Chrysoeriol 7-O-(6''-malonyl-glucoside)	PLQBKZOSLQNLOX-GOZZSVHWSA-N	C25H24O14	1.0908	pos	3.2338e+07	0	2.63134e+07	4.92673e+07
Broussonetine J	YIEPZDPKKNJALX-UHFFFAOYSA-N	C22H40N2O7	1.76138	pos	0	7.19919e+07	6.8152e+07	4.90155e+07
Isoesculeogenin A	FBKQAVWTYDQPAB-UHFFFAOYSA-N	C27H45NO4	0.962417	pos	0	3.94362e+07	3.65253e+07	4.89609e+07
dysoxin 3a	ATINGFMQHJZPDU-UHFFFAOYSA-N	C39H56O8	0.747894	pos	2.00598e+07	0	2.08258e+07	4.89328e+07
14-Acetoxy-15-hydroxyirpexan	IULXNECTRWHKDM-UHFFFAOYSA-N	C38H66O10	1.54131	neg	3.7623e+07	0	7.09664e+06	4.88918e+07
7,7'-Dihydroxy-3,8'-biscoumain	BXHOOISUHNRJMT-UHFFFAOYSA-N	C18H10O6	0.0585583	pos	3.45744e+07	68073.3	3.3936e+07	4.85866e+07
1-Hexadecanoylpyrrolidine	ULDNZNZTSYZQKK-UHFFFAOYSA-N	C20H39NO	0.474588	pos	3.10875e+07	2.69164e+07	3.49086e+07	4.85719e+07
Yunnaneic acid D	WSNGPQNYHJVZGN-UHFFFAOYSA-N	C27H24O12	0.638545	neg	4.71681e+07	0	1.92476e+07	4.85415e+07
2,4-Pentanedione	YRKCREAYFQTBPV-UHFFFAOYSA-N	C5H8O2	4.49541	pos	649360	4.07382e+06	3.6003e+07	4.83971e+07
2-O-Me-D-Ribose	UAXFCDNRLADBDZ-UHFFFAOYSA-N	C6H12O5	1.71752	neg	2.38041e+07	5.34458e+07	3.34863e+07	4.80103e+07
(9xi,10xi,12xi)-9,10-Dihydroxy-12-octadecenoic acid	XEBKSQSGNGRGDW-JXMROGBWSA-N	C18H34O4	0.417348	neg	8.5309e+06	7.14577e+06	2.31205e+07	4.79863e+07
Physcion 8-O-β-D-glucopyranoside	POMKXWCJRHNLRP-DQMLXFRHSA-N	C22H22O10	2.14089	pos	2.71809e+07	37923.5	3.43311e+07	4.78862e+07
Histamine	NTYJJOPFIAHURM-UHFFFAOYSA-N	C5H11Cl2N3	2.82522	pos	3.38624e+07	4.08687e+07	6.26574e+07	4.78608e+07
ent-7beta,20-epoxy-1alpha,3alpha,6alpha,7alpha,15alpha-pentahydroxykaur-16-ene 6,15-diacetate (rabdolongin A)|Rabdolongin A	BBDWNMLTWBRSBI-UHFFFAOYSA-N	C24H34O8	1.22767	pos	5.05678e+07	25899.2	2.11765e+07	4.77908e+07
N-methylnicotinate	WWNNZCOKKKDOPX-UHFFFAOYSA-N	C7H7NO2	3.28867	pos	7.30048e+07	336876	1.90366e+07	4.77466e+07
Beta-D-Galactose	WQZGKKKJIJFFOK-FPRJBGLDSA-N	C6H12O6	2.02681	neg	2.27345e+07	4.58764e+06	4.07574e+07	4.77153e+07
7,7'-Dihydroxy-6,8'-bicoumarin	GGNRJMYAXINNLX-UHFFFAOYSA-N	C18H10O6	0.00994183	pos	2.14362e+07	262638	2.58789e+07	4.76561e+07
Daedaleaside C	QDOSDEKSOUMQAH-UHFFFAOYSA-N	C41H60O11	1.93511	pos	1.96984e+06	518890	1.07228e+08	4.74735e+07
17-Hydroxyandrostan-3-one	NVKAWKQGWWIWPM-UHFFFAOYSA-N	C19H30O2	0.896293	pos	108219	555716	3.11208e+07	4.7447e+07
germanicol trans-coumaroyl ester|olean-18-en-3beta-O-(E)-coumaroyl ester	KDQKVXOSQODEFX-UHFFFAOYSA-N	C39H56O3	2.1408	pos	1.13459e+06	3.45512e+07	3.06357e+07	4.71544e+07
Pinocembrin-7-O-β-D-glucopyranoside	GPGFGFUBECSNTG-SFTVRKLSSA-N	C21H22O9	0.525481	neg	2.90989e+06	1.24916e+08	4.15674e+07	4.69852e+07
5-O-Methylembelin	KHBJLRRAMCJZLZ-UHFFFAOYSA-N	C18H28O4	0.967205	neg	3.1566e+07	27734	1.64702e+07	4.68821e+07
3-O-??-D-Galactopyranosyl-(1閳ユ◤鍌楀瀻2)-[??-D-xylopyranosyl(1閳ユ◤鍌楀瀻3)]-??-D-glucuronopyranosyl-gypsogenin	GAJNMIYYDYNADC-UHFFFAOYSA-N	C47H72O19	0.660579	neg	3.44768e+07	0	2.5353e+07	4.66378e+07
[IIN-based: Match]	ZUEKQPJBVORAFH-UHFFFAOYSA-N	C20H18O6	1.91601	pos	1.39094e+07	0	2.11317e+07	4.65828e+07
Harunganin	SWTXVTYSWPYCIX-UHFFFAOYSA-N	C30H36O4	0.0934265	pos	1.39109e+07	332630	2.42043e+07	4.62538e+07
Pseudoanisatin	NOHXYGXFTACADH-UHFFFAOYSA-N	C15H22O6	2.11472	pos	1.06109e+06	167758	4.06579e+07	4.61821e+07
Daedaleaside D	RSBAXXTZWHYISF-UHFFFAOYSA-N	C39H60O10	1.96088	pos	1.92009e+07	0	1.96974e+07	4.61546e+07
Kojibiose	PZDOWFGHCNHPQD-UHFFFAOYSA-N	C12H22O11	1.16021	neg	4.9028e+08	1.16847e+06	1.58281e+07	4.60897e+07
14alpha-Hydroxyixocarpanolide	SPZVPSAUINZULS-UHFFFAOYSA-N	C28H40O7	0.787452	pos	2.5066e+07	0	2.19863e+07	4.58269e+07
Lamiol	IPTRSKQQZMUJQM-UHFFFAOYSA-N	C16H26O10	0.431857	neg	88090.5	3.74565e+07	4.57083e+07	4.56849e+07
methyl 3alpha-acetoxy-15-hydroxy-labd-8(17)-en-19-oate	DAKZDANVMKUEPB-UHFFFAOYSA-N	C23H38O5	1.28589	pos	0	2.88408e+07	2.8337e+07	4.56848e+07
GA58-1(10),16-dienoic acid	IIACBSOUZZZZAE-UHFFFAOYSA-N	C19H24O6	0.538149	neg	6.72851e+06	5340.87	1.6264e+07	4.56744e+07
Phosphorylcholine	YHHSONZFOIEMCP-UHFFFAOYSA-O	C5H15NO4P	0.328075	pos	157645	5.72061e+07	5.80313e+07	4.56127e+07
Lycoclavine	ZSZTZZJEQFTDFX-UHFFFAOYSA-N	C18H29NO3	1.08499	pos	2.56949e+07	184019	2.22714e+07	4.55326e+07
3-Hydroxymethylglutaric acid	NPOAOTPXWNWTSH-UHFFFAOYSA-N	C6H10O5	1.79019	neg	1.41958e+07	8.93982e+06	2.47492e+07	4.54238e+07
10-Methoxy-palmitinsaeuremethylester|Methyl-10-methoxypalmitat	RXRPTOHFHPKKAL-UHFFFAOYSA-N	C18H36O3	0.821322	pos	0	3.13187e+07	3.85278e+07	4.53985e+07
PYROGALLOL	WQGWDDDVZFFDIG-UHFFFAOYSA-N	C6H6O3	1.71835	pos	2.84184e+07	1.4239e+06	1.24515e+08	4.51544e+07
3-(2-methylpropyl)-2,3,6,7,8,8a-hexahydropyrrolo[1,2-a]pyrazine-1,4-dione	SZJNCZMRZAUNQT-UHFFFAOYSA-N	C11H18N2O2	0.16817	pos	2.14409e+07	534807	2.21778e+07	4.49983e+07
L-Prolyl-L-leucin-anhydrid|Prolyl-leucyl-anhydrid	QEDMGXHHRXIZDW-UHFFFAOYSA-N	C11H20N2O3	1.29292	pos	2.70158e+07	3.74531e+07	3.25144e+07	4.49964e+07
Hyodeoxycholic acid	DGABKXLVXPYZII-UHFFFAOYSA-N	C24H40O4	0.389299	neg	0	1.969e+07	6.57397e+06	4.48947e+07
Ethyl 3-hydroxybutyrate	OMSUIQOIVADKIM-UHFFFAOYSA-N	C6H12O3	3.34334	neg	1.74642e+07	7.14388e+06	3.13699e+07	4.43951e+07
ent-Kaurenal	JCAVDWHQNFTFBW-UHFFFAOYSA-N	C20H30O	1.42959	pos	147521	5.09763e+07	4.33706e+07	4.41469e+07
26-O-beta-D-glucopyranosyl-3beta,22xi,26-trihydroxy-(25R)-5alpha-furostan-6-one 3-O-alpha-L-arabinopyranosyl-(1<*>6)-beta-D-glucopyranoside|26-O-beta-D-glucopyranosyl-3beta,22xi,26-trihydroxy-(25R)-5alpha-furostan-6-one 3-O-alpha-L-arabinopyranosyl-(1[*]6)-beta-D-glucopyranoside	IIIYSIWSTCMYQC-UHFFFAOYSA-N	C44H72O19	1.57755	neg	2.32187e+07	0	2.52828e+07	4.38797e+07
pannomycin	FFRJHWIQULDGGE-UHFFFAOYSA-N	C22H32O3	0.0312235	neg	3249.79	7.48852e+07	4.17684e+07	4.38382e+07
6-Acetoxy-5-hexadecanolide	SPOXUSGCKOQPRB-UHFFFAOYSA-N	C18H32O4	0.48843	neg	4.22165e+06	550185	1.18956e+07	4.37146e+07
Methyl linoleate	WTTJVINHCBCLGX-NQLNTKRDSA-N	C19H34O2	1.11252	pos	0	2.54528e+07	4.76696e+07	4.35461e+07
L-Methionine	FFEARJCKVFRZRR-BYPYZUCNSA-N	C5H11NO2S	0.861591	pos	4.26848e+06	5.37949e+07	7.32085e+07	4.35326e+07
Bergaptol	GIJHDGJRTUSBJR-UHFFFAOYSA-N	C11H6O4	0.850406	pos	2.0343e+07	0	2.35649e+07	4.30038e+07
(22R)-4beta-hydroxy-1-oxo-witha-2,5,24-trienolide	GUXVQBOMRFNXAD-UHFFFAOYSA-N	C28H38O4	0.874323	neg	3.12049e+06	1.62258e+08	1.18425e+08	4.26024e+07
Sativanone	JOVYBWHPTQRVNZ-UHFFFAOYSA-N	C17H16O5	0.00105987	neg	2.74893e+07	41261.6	1.32549e+07	4.23949e+07
Neoandrographolide	YGCYRQKJYWQXHG-RDNQFMDVSA-N	C26H40O8	1.73661	pos	1.50335e+07	2.35415e+07	9.03587e+06	4.22432e+07
methyl 7-hydroxyhomodaphniphyllate|rel-(3aR,4S,4aS,5R,8S,8aR,8bS,9S,10S)-octahydro-9-hydroxy-8-methyl-5-(1-methylethyl)-4,8,3a-[1,2,4]butanetriylcyclopent[b]indole-8a(4aH)-propanoic acid methyl ester	XKIOJAXKHUEQRM-UHFFFAOYSA-N	C23H37NO3	2.60159	pos	0	3.07348e+07	3.70366e+07	4.22256e+07
14-methoxy-15,16-dinor-5alphaH,9alphaH-labda-13(E),8(17)-dien-12-one	ICSZSHBHSGTAHU-UHFFFAOYSA-N	C19H30O2	0.692849	pos	2.51907e+06	316356	1.20734e+07	4.19021e+07
(4E)-6,7,9-trihydroxydec-4-enoic acid	VUQBJMXWGGVNFO-UHFFFAOYSA-N	C10H18O5	2.48581	neg	4.9984e+07	163077	2.18131e+07	4.18463e+07
4'-O-Methylkanzonol W	HYXYVJUECMXNLJ-UHFFFAOYSA-N	C21H18O5	0.377506	pos	3.13887e+07	0	3.00595e+07	4.18079e+07
3'-(1-Oxoheptacosyloxy)-5,7-dihydroxyflavone	UKHYBGGGLCRWHT-UHFFFAOYSA-N	C42H62O6	2.65863	neg	0	1.01239e+08	2.71809e+07	4.16388e+07
lithospermic acid|Monomethyl lithospermate	NFOCYHUCMXEHDG-UHFFFAOYSA-N	C28H24O12	0.0639016	pos	1.32455e+07	0	2.81022e+07	4.16296e+07
maltotriose	FYGDTMLNYKFZSV-PXXRMHSHSA-N	C18H32O16	0.203468	neg	2.73773e+07	628556	4.49033e+07	4.15758e+07
C12-AS (TENTATIVE)	MOTZDAYCYVMXPC-UHFFFAOYSA-N	C12H26O4S	1.02011	neg	1.97919e+07	8.1561e+06	2.19538e+07	4.14803e+07
Octa-2,4-dienal	DVVATNQISMINCX-UHFFFAOYSA-N	C8H12O	0.97886	pos	2.28679e+07	607653	2.17401e+07	4.14438e+07
7beta-(1S,5-dimethyl-4-hexenyl)-3'aalpha,5',6',7',8',8'a,9',9'aalpha-octahydro-5,5'beta,8'abeta-trimethylspiro(bicyclo[2.2.2]oct-5-en-2,3'(2'H)-naphtho[2,3-b]furan)-2'-on|7beta-(1S,5-dimethyl-4-hexenyl)-3'aalpha,5',6',7',8',8'a,9',9'aalpha-octahydro-5,5'beta,8'abeta-trimethylspiro<bicyclo<2.2.2>oct-5-en-2,3'(2'H)-naphtho<2,3-b>furan>-2'-on	CMXCLTFHXRTSPB-UHFFFAOYSA-N	C30H44O2	0.110898	pos	2.15889e+07	1.34376e+06	3.07579e+07	4.13649e+07
Pseudoisopsoralen	MLMVLVJMKDPYBM-UHFFFAOYSA-N	C11H6O3	2.51035	pos	3.63029e+07	5.25484e+06	3.42871e+07	4.12885e+07
Androstenedione	AEMFNILZOJDQLW-QAGGRKNESA-N	C19H26O2	2.0647	pos	1.16562e+07	242594	2.1362e+07	4.12554e+07
amblyone	IYHHZIXQJXKUSA-UHFFFAOYSA-N	C27H42O4	0.339478	neg	16845.8	2.51764e+07	3.74796e+07	4.10167e+07
Betaenone C	YRYPVWAJOMXOHH-UHFFFAOYSA-N	C21H34O5	0.901805	pos	523463	2.88069e+06	5.60866e+07	4.09109e+07
scutorientalin E	VAWWCFLTZOOIBS-UHFFFAOYSA-N	C33H40O10	0.298361	pos	0	3.51716e+07	3.37883e+07	4.09077e+07
(-)-sessilifoliamide J|(?)-sessilifoliamide J|sessilifoliamide J	FKKHBZKSDBNCSU-UHFFFAOYSA-N	C17H23NO5	1.08965	pos	208038	0	2.51679e+07	4.07008e+07
Tmndga	ORQFDHFZSMXRLM-UHFFFAOYSA-N	C22H30O4	0.449177	pos	16274.8	919219	2.66577e+07	4.04724e+07
Teucrein	PWSAKIKRNLLDNQ-UHFFFAOYSA-N	C14H20O5	0.918325	pos	2.89889e+07	1.04267e+06	3.32282e+07	4.04191e+07
aspirin	BSYNRYMUTXBXSQ-UHFFFAOYSA-N	C9H8O4	1.76564	pos	1.87555e+07	0	2.32328e+07	4.0373e+07
Ponganone X	WGOHQWRDEQYATJ-UHFFFAOYSA-N	C19H18O7	1.17874	neg	52595.2	1.40575e+07	2.04475e+07	4.03567e+07
SCHEMBL19490611	XCGZWJIXHMSSQC-UHFFFAOYSA-N	C15H12O7	0.57134	pos	457441	1.58289e+07	1.08894e+08	4.03218e+07
4',7-Dimethoxy-5,6-dihydroxyflavanone	MFNNBYIVJIVZFM-UHFFFAOYSA-N	C17H16O6	1.7236	pos	2.48527e+07	0	1.85199e+07	4.03126e+07
Schizanthine C	CNZQGLUNWSBMAN-UHFFFAOYSA-N	C26H38N2O6	0.184772	pos	733077	7.08783e+06	1.06918e+07	4.02548e+07
Sandosaponin B	WIHKYILMSPQBIM-UHFFFAOYSA-N	C48H76O19	9.89655	neg	3.246e+07	0	2.15731e+07	4.00495e+07
8-hydroxy-2,6-dimethyloct-2-enoic acid	CDAJACJYYZHNJA-UHFFFAOYSA-N	C10H18O3	2.51693	neg	498637	2.95712e+07	2.10599e+07	3.998e+07
4-AMINOBENZOATE	ALYNCZNDIQEVRV-UHFFFAOYSA-N	C7H7NO2	0.645097	pos	2.22289e+07	4.15662e+07	4.01528e+07	3.97742e+07
5-Methylcoumarin	FXMGSXNQELBPMX-UHFFFAOYSA-N	C10H8O2	1.06622	neg	2.06783e+07	183783	1.6384e+07	3.958e+07
6|A-Hydroxycortisol	GNFTWPCIRXSCQF-UHFFFAOYSA-N	C21H30O6	1.92569	pos	208503	297754	2.62995e+07	3.94549e+07
6-O-??-D-Galactopyranosyl-1-deoxynojirimycin	IIJOGKBFUDNUQI-UHFFFAOYSA-N	C12H23NO9	0.898491	pos	1.06251e+07	0	1.0051e+07	3.94192e+07
3,16-Diacetyl pseudosolasodine	DQCWPGBLFVRMDS-UHFFFAOYSA-N	C31H47NO4	1.34172	pos	0	4.75414e+07	3.51717e+07	3.93766e+07
ent-6,9-Dihydroxy-15-oxo-16-kauren-19-oic acid beta-D-glucopyranosyl ester	NRUSGLWZCNYPPQ-UHFFFAOYSA-N	C26H38O10	0.337691	neg	2.87143e+07	7305.71	1.6343e+07	3.9204e+07
O-dodecanoylcarnitine	FUJLYHJROOYKRA-UHFFFAOYSA-N	C19H37NO4	1.34314	pos	0	4.66182e+07	3.85379e+07	3.90285e+07
1,2,6,7,8,9-Hexahydro-1,6,6-trimethyl-3,11-dioxanaphth[2,1-e]azulene-10,12-dione	ROYYPPPACDMYJY-UHFFFAOYSA-N	C19H20O4	1.30988	pos	1.83184e+07	176937	2.01534e+07	3.88443e+07
(18R)-18-O-beta-D-glucopyranoside of murolic acid|murolic acid (18R)-18-O-beta-D-glucopyranoside	BQMKIYAUBIGCRK-UHFFFAOYSA-N	C27H46O10	14.899	neg	401102	4.10328e+07	3.63747e+07	3.86794e+07
4'-O-beta-D-glucopyranosyl protoapigenin|protoapigenin 4'-O-beta-D-glucoside|protoapigenin-4'-glucoside	JSUSPSWATHLLME-UHFFFAOYSA-N	C21H22O11	2.64156	neg	0	7.57712e+06	1.53679e+07	3.86375e+07
CHEMBL458698	QSAIBULZNVPLAJ-UHFFFAOYSA-N	C12H20O5	1.38799	pos	3.43936e+07	422753	2.23016e+07	3.85571e+07
4,6-dihydroxy-5-methylphthalide	QJBPRJDMIUSGLF-UHFFFAOYSA-N	C9H8O4	0.709133	neg	3.85742e+07	0	3.15692e+07	3.84816e+07
Hymenoratin B	JVXPGZAKWVHPLQ-UHFFFAOYSA-N	C20H30O6	1.16741	pos	2.74988e+07	1.46766e+06	1.89557e+07	3.83935e+07
Indole	SIKJAQJRHWYJAI-UHFFFAOYSA-N	C8H7N	1.85465	pos	2.44673e+07	4.28134e+07	4.82373e+07	3.81214e+07
o-Veratraldehyde	JIVGSHFYXPRRSZ-UHFFFAOYSA-N	C9H10O3	0.575429	pos	2.12831e+07	130043	1.68779e+07	3.7948e+07
2,3-Dihydro-11,11-bis(3-methyl-2-butenyl)-5,6-dihydroxy-2,2,3,8-tetramethylanthra[2,3-b]furan-4(11H)-one	AXIJTAQSMFBWGD-UHFFFAOYSA-N	C30H36O4	0.342489	pos	1.7645e+06	3.62019e+07	3.42791e+07	3.79069e+07
Salvinorin G	KLIYEWBCXJFOSK-UHFFFAOYSA-N	C23H26O8	1.8426	neg	2.72829e+07	334624	1.24119e+07	3.7729e+07
(2SR,3RS)-methyl 3-hydroxy-2-((Z)-hexadec-7-enyl)-4-oxopentanoate	RKVXHJRCUIJAHS-UHFFFAOYSA-N	C22H40O4	1.48591	pos	197548	2.76677e+07	2.68456e+07	3.76362e+07
Dihydrotanshinone I	HARGZZNYNSYSGJ-JTQLQIEISA-N	C18H14O3	0.268675	pos	1.38781e+08	0	1.22419e+07	3.7548e+07
Garcinianone B	FZFFGBOPCQADGY-UHFFFAOYSA-N	C28H32O6	0.520136	neg	64940.9	3.50473e+07	2.70843e+07	3.75121e+07
Methylgingerol	CTGAPJBPSCUFRO-UHFFFAOYSA-N	C18H28O4	1.82466	pos	4.23338e+07	3.11826e+06	1.24046e+07	3.75061e+07
MEGxp0_001555	KPLBOWKEQXYXSD-UHFFFAOYSA-N	C24H30O7	1.47404	neg	16935.5	1.88872e+07	1.925e+07	3.74342e+07
Deoxypatulinic acid	NDEBBGKFXQDNLC-UHFFFAOYSA-N	C7H8O4	0.581737	pos	2.42837e+07	339719	1.92318e+07	3.71475e+07
Anagigantic acid	KWYIZCAVXFLWSZ-UHFFFAOYSA-N	C18H28O3	0.266659	pos	1.30086e+07	1.19742e+06	2.00407e+07	3.69505e+07
4-Ethylcyclohexanone	OKSDJGWHKXFVME-UHFFFAOYSA-N	C8H14O	2.87088	neg	5.25218e+07	820395	1.99839e+07	3.68622e+07
(+)-Muscarine	UQOFGTXDASPNLL-UHFFFAOYSA-N	C9H20NO2+	2.48402	pos	7.93704e+06	3.71719e+07	7.18062e+07	3.67609e+07
Paeonol	UILPJVPSNHJFIK-UHFFFAOYSA-N	C9H10O3	0.389833	pos	2.46107e+07	142663	1.39696e+07	3.66482e+07
12-Acetoxy-abieta-8,11,13-trien-7-on|12-acetoxy-abieta-8,11,13-trien-7-one|sugiol acetate|Sugiol-Acetat|Sugiolacetat	RLSZLHWSJHPNCK-UHFFFAOYSA-N	C22H30O3	0.316205	pos	127865	5.83531e+07	2.35625e+07	3.66381e+07
5,7-dihydroxy-6-methoxy-2-[4-[(2S,3R,4S,5S,6R)-3,4,5-trihydroxy-6-(hydroxymethyl)oxan-2-yl]oxyphenyl]chromen-4-one	MORLNMAFXVHNAI-IWLDQSELSA-N	C22H22O11	0.123777	pos	1.76424e+07	4.02163e+06	1.94319e+07	3.65714e+07
Chromolaevanedione	GDQRIBRXZMXMRL-UHFFFAOYSA-N	C14H22O2	2.5333	neg	4.25481e+07	1.79337e+07	3.13941e+07	3.6486e+07
metaplexigenin 3-O-beta-D-glucopyranosyl-(1->4)-beta-D-thevetopyranosyl-(1-.4)-beta-D-oleandropyranosyl-(1->4)-beta-D-cymaropyranosyl-(1->4)-beta-D-digitoxypyranoside	NYWHUHXPEHCMFY-UHFFFAOYSA-N	C56H90O25	5.51619	neg	0	5.50751e+07	4.30032e+07	3.62823e+07
Enterolactone	HVDGDHBAMCBBLR-UHFFFAOYSA-N	C18H18O4	0.912708	neg	1.57775e+07	5.05289e+07	1.64959e+07	3.62439e+07
Zaluzanin C isobutyrate	AKXLMIWFRPOECM-UHFFFAOYSA-N	C19H24O4	0.327919	neg	9.95941e+06	1.78672e+06	1.69421e+07	3.60943e+07
Oxformasine	SCLAEKRZYXVHQI-UHFFFAOYSA-N	C14H18O5	1.00336	pos	4.11632e+07	296637	2.29735e+07	3.5909e+07
4-[(E)-3-[1-carboxy-2-(3,4-dihydroxyphenyl)ethoxy]-3-oxoprop-1-enyl]-2-(3,4-dihydroxyphenyl)-7-hydroxy-2,3-dihydro-1-benzofuran-3-carboxylic acid	UJZQBMQZMKFSRV-XBXARRHUSA-N	C27H22O12	0.547758	pos	2.95078e+07	0	2.74555e+07	3.56738e+07
salvianolic acid K	AZOCLKLJIKZOLF-UHFFFAOYSA-N	C27H24O13	1.76193	neg	2.15992e+07	47849	4.7922e+06	3.5605e+07
Griffonilide	VXWUBYBAUIHOHG-DTLFHODZSA-N	C8H8O4	1.26212	neg	1.03132e+07	1.05673e+07	1.66106e+07	3.54187e+07
9'-methyl lithospermate	YQEVPWOGQQZUKO-UHFFFAOYSA-N	C28H24O12	0.295399	pos	981138	26241.9	2.64208e+07	3.53505e+07
(-)-Huperzine A	ZRJBHWIHUMBLCN-UHFFFAOYSA-N	C15H18N2O	1.9176	pos	0	2.94115e+07	2.9989e+07	3.52672e+07
Estriol	PROQIPRRNZUXQM-ZXXIGWHRSA-N	C18H24O3	0.647924	pos	1.21114e+07	83185.9	1.76362e+07	3.52462e+07
N-[[3-(b-D-Glucopyranosyloxy)-2,3-dihydro-2-oxo-1H-indol-3-yl]acetyl]aspartic acid	ANAVISFXAGVRIA-UHFFFAOYSA-N	C20H24N2O12	0.144278	pos	3.1615e+07	12814.2	1.56743e+07	3.52422e+07
Dictyoquinazol A	SHUSJJZZTZAKPD-UHFFFAOYSA-N	C17H16N2O4	1.4271	pos	1.40206e+07	467751	1.15724e+08	3.50902e+07
(2R,3S,4S,5R,6R)-2-(hydroxymethyl)-6-[4-(4-hydroxy-2,6,6-trimethylcyclohexen-1-yl)butan-2-yloxy]oxane-3,4,5-triol	QOLJILMTPKQQQA-KWEBYEANSA-N	C19H34O7	0.696158	pos	111676	21504.2	2.73639e+07	3.50418e+07
3beta-Hydroxy-5alpha-pregnan-16-on	VPTJMFZNOMDWJS-UHFFFAOYSA-N	C21H34O2	0.551236	pos	0	1.71314e+07	4.50566e+07	3.4956e+07
2,5-dimethoxy-3-undecylphenol	IXMXPKGDLIPGOO-UHFFFAOYSA-N	C19H32O3	1.26342	pos	87880	6.14635e+06	3.58072e+07	3.48022e+07
O2-natafuranamine	OMPGPMBHVLLRMF-UHFFFAOYSA-N	C35H48N2O6	0.853255	neg	0	2.69024e+07	1.98795e+07	3.46881e+07
hexyl glucoside	JVAZJLFFSJARQM-UHFFFAOYSA-N	C12H24O6	0.865655	pos	0	2.61021e+07	2.62664e+07	3.45273e+07
[12]-Gingerol	HQXJXOYLPWCMGL-UHFFFAOYSA-N	C23H38O4	0.267819	pos	19422.5	2.8076e+07	1.98322e+07	3.45257e+07
4-(6-furan-3-yl-3-methyl-piperidin-2-yl)-2-methyl-but-2-en-1-ol|Nuphamin|Nuphamine	VACAXMGPQVSASV-UHFFFAOYSA-N	C15H23NO2	1.43205	pos	4.30137e+07	7.785e+07	4.92597e+07	3.45097e+07
7-Methoxycoumarin	LIIALPBMIOVAHH-UHFFFAOYSA-N	C10H8O3	3.03236	pos	1.41302e+07	460835	2.08593e+07	3.45044e+07
phenylglyoxal	OJUGVDODNPJEEC-UHFFFAOYSA-N	C8H6O2	2.26426	pos	2.1707e+07	26071.6	2.09396e+07	3.44612e+07
Sagerinic acid	SUYLTDFWHNXGDX-UHFFFAOYSA-N	C36H32O16	0.87383	pos	2.24958e+07	72528.4	2.04044e+07	3.42165e+07
5-hydroxy-2,2-dimethyl-10-(2-methylbut-3-en-2-yl)pyrano[3,2-g]chromen-8-one	WYMMNGQSPNWCIK-UHFFFAOYSA-N	C19H20O4	1.07798	pos	2.27333e+06	0	2.42379e+07	3.39863e+07
(E,E,E)-3-(Hydroxymethyl)-7,11,15-trimethyl-2,6,10-hexadecatriene-1,14,15-triol	OUNTWVOXOAIJPN-UHFFFAOYSA-N	C20H36O4	1.03524	pos	1.95542e+06	5.80424e+07	4.29823e+07	3.39636e+07
nor-Podopyrone	WKDCECLQLOZEBT-UHFFFAOYSA-N	C18H30O3	1.176	pos	2.22781e+07	2.08547e+06	1.23396e+07	3.39245e+07
delta1,3-Hydroxybakuchiol	GWTVXRIOJRNDCM-UHFFFAOYSA-N	C18H24O2	0.833359	pos	1.67645e+06	813852	1.58746e+07	3.38115e+07
6-Hydroxy-2,5-dimethoxy-7-phenyl-1H-phenalen-1-on|6-hydroxy-2,5-dimethoxy-7-phenyl-1H-phenalen-1-one|xiphidone	BVIDEWFIIVXACV-UHFFFAOYSA-N	C21H16O4	0.858039	pos	6.29613e+07	0	1.84132e+07	3.37101e+07
Pectolinarigenin	GPQLHGCIAUEJQK-UHFFFAOYSA-N	C17H14O6	2.28921	neg	5.13549e+07	713416	7.98746e+06	3.36961e+07
Echinatine	SFVVQRJOGUKCEG-UHFFFAOYSA-N	C15H25NO5	0.759224	pos	0	60696.2	1.92273e+07	3.35881e+07
(+)-(12S,5Z,8Z,10E,14Z)-ethyl 12-hydroxyicosa-5,8,10,14-tetraenoate|(S)-ethyl (5Z,8Z,10E,14Z)-12-hydroxyeicosa-5,8,10,14-tetraenoate	YCIKGMHBYGTPMB-UHFFFAOYSA-N	C22H36O3	1.4968	neg	0	6.16369e+07	2.89189e+07	3.35791e+07
1-(4-Hydroxy-3-methoxyphenyl)dodec-4-en-3-one	LGZSMXJRMTYABD-UHFFFAOYSA-N	C19H28O3	1.47493	pos	4.76997e+06	938521	1.50609e+07	3.35316e+07
Gibberellin A4&A7	SEEGHKWOBVVBTQ-UKJRIFTCSA-N	C19H22O5	0.931739	neg	1.30301e+07	7049.83	1.7265e+07	3.34809e+07
(3beta,25R)-17-hydroxyspirost-5-en-3-yl 2-O-acetyl-6-deoxy-alpha-L-mannopyranosyl-(1->2)-[ beta-D-xylopyranosyl-(1->4)]- beta-D-glucopyranoside|pennogenin 3-O-[2-O-acetyl-alpha-L-rhamnopyranosyl-(1?2)] [beta-D-xylopyranosyl-(1?4)]-beta-D-glucopyranoside|pennogenin-3-yl 2-O-acetyl-alpha-L-rhamnopyranosyl-(1->2)-[beta-D-xylopyranosyl-(1->4)]-beta-D-glucopyranoside	ZGNIQFRSSKZLGT-UHFFFAOYSA-N	C46H72O18	1.83678	neg	1.86185e+07	0	1.45143e+07	3.34125e+07
Formononetin 7-O-(6''-acetylglcoside)	HZJBDSMAAFNHHL-UHFFFAOYSA-N	C24H24O10	0.327985	pos	1.58748e+07	861181	1.58161e+07	3.33759e+07
sebacic acid	CXMXRPHRNRROMY-UHFFFAOYSA-N	C10H18O4	1.55451	pos	411138	567974	2.32694e+07	3.33419e+07
Sativanine K|sativanine-K	SICJMNVMLARZFI-UHFFFAOYSA-N	C27H38N4O6	2.92957	neg	14484.5	8.09609e+07	3.92293e+07	3.32645e+07
7-caffeoylsedoheptulose	MJOZYOYVRKCTGK-UHFFFAOYSA-N	C16H20O10	1.13945	neg	1.83496e+07	226957	1.78434e+07	3.32444e+07
12-Hydroxystearic acid	ULQISTXYYBZJSJ-UHFFFAOYSA-N	C18H36O3	1.06806	neg	342820	5.85618e+07	2.2965e+07	3.31058e+07
(3beta,25R)-3-[(beta-D-glucopyranosyl-(1->2)-[6-O-hexadecanoyl-beta-D-glucopyranosyl-(1->6)]-beta-D-glucopyranosyl)oxy]-5beta-spirostan|disporoside B	JBKAIHDWMLFAAX-UHFFFAOYSA-N	C55H94O14	1.97439	pos	0	2.54448e+07	2.86643e+07	3.31004e+07
1-Naphthalenecarboxylic acid, 5-[2-(3-furanyl)ethyl]-3,4,4a,5,6,7,8,8a-octahydro-5,6,8a-trimethyl-, methyl ester, [4aS-(4a.alpha.,5.alpha.,6.beta.,8a.beta.)]-	QDSWHJNTSPBQME-UHFFFAOYSA-N	C21H30O3	0.321491	pos	4679.59	4.66182e+06	3.06211e+07	3.30333e+07
12(R)-HEPE	MCRJLMXYVFDXLS-UHFFFAOYSA-N	C20H30O3	0.913229	neg	25190.6	5.55152e+07	3.00989e+07	3.30282e+07
Hypoxylonol A	DSVFBOXMAJTYHV-UHFFFAOYSA-N	C22H20O5	0.564304	pos	6.17847e+07	2.00278e+07	2.32265e+07	3.29198e+07
NSC36563	VJZSYTJVILGESJ-UHFFFAOYSA-N	C22H24O8	0.264613	pos	2.02252e+07	185312	1.79646e+07	3.28102e+07
DTXSID40388374	SRKAZFSLCLSHPY-UHFFFAOYSA-N	C15H18O4	1.50201	neg	28653	3.58677e+07	2.90048e+07	3.26948e+07
Antibiotic MBP 049-13	CFYZWMOGIXBXRL-UHFFFAOYSA-N	C25H37NO3	2.34027	pos	0	1.59677e+07	1.30342e+07	3.25009e+07
3beta-angeloyloxy-6alpha,14-epoxyfuranoereomphilane	PFLSRYIOOFGEGE-UHFFFAOYSA-N	C20H26O4	0.190975	pos	2.45468e+07	53705.4	1.47209e+07	3.24302e+07
19-furan-2-ylnonadeca-5,7-diynoic acid	AZDANMRNWNLXOP-UHFFFAOYSA-N	C23H32O3	0.466463	pos	6043.47	1.21198e+07	3.08766e+07	3.23444e+07
Artemisin	LUHMMHZLDLBAKX-UHFFFAOYSA-N	C15H18O4	2.22353	pos	1.5357e+06	420341	2.83107e+07	3.21391e+07
Uric acid	LEHOTFFKMJEONL-UHFFFAOYSA-N	C5H4N4O3	0.337865	neg	7.45985e+06	1.97842e+07	3.29993e+07	3.21346e+07
1-dimethylarsinoyl-pentadecane	JUBXTBKUGRSJTD-UHFFFAOYSA-N	C17H37AsO	1.00632	pos	3.61859e+07	2.76842e+06	1.19237e+07	3.21076e+07
Tropolone	MDYOLVRUBBJPFM-UHFFFAOYSA-N	C7H6O2	3.22468	neg	2.09295e+07	2.23078e+06	1.79491e+07	3.19888e+07
Poncirin	NLAWPKPYBMEWIR-UHFFFAOYSA-N	C28H34O14	3.15314	neg	2.107e+07	5910.05	2.03047e+07	3.1918e+07
(3R,6R)-N-methyl-N-(1-hydroxy-2-methylpropyl)-phenylalanine	AFSFYXHJJVYLOJ-UHFFFAOYSA-N	C15H21NO4	2.24385	pos	294105	2.88024e+07	1.99787e+06	3.1488e+07
Corchorifatty acid A	FCCFXOHVERVHQR-KDXRDGMUSA-N	C18H28O4	1.47532	pos	1.68188e+07	0	1.627e+07	3.14654e+07
3,4,7-Trihydroxy-5-methoxy-8-prenylflavan 4-O-(beta-D-xylopyranosyl-(1->6)-beta-D-glucopyranoside)	SGQQCSHVXAXBTJ-UHFFFAOYSA-N	C32H42O15	0.693248	neg	2.37381e+07	0	1.82528e+07	3.13359e+07
canaliculatin	WSGCGASSDMLJCX-UHFFFAOYSA-N	C21H14O6	2.39623	pos	92459.4	39035.1	1.74e+07	3.12686e+07
inonotusin A	LRGCEPOHIRBSJQ-UHFFFAOYSA-N	C15H14O6	1.75098	pos	3.63492e+06	33336.7	6.63862e+06	3.11592e+07
3,3'-Bis(4''-hydroxyanigorufone)	QDYVWJODKPDRFG-UHFFFAOYSA-N	C38H22O6	0.251627	pos	4.34561e+07	0	6.36237e+06	3.10855e+07
2-hydroxymethyl-tetrahydro-pyran-3,4,5-triol	MPCAJMNYNOGXPB-UHFFFAOYSA-N	C6H12O5	1.70504	neg	4.53667e+06	3.28837e+07	3.05425e+07	3.10286e+07
Parviflorene H	LOJJUPSELBKMOO-UHFFFAOYSA-N	C30H34O2	1.43483	pos	8.04737e+07	0	5.73525e+06	3.102e+07
(Z)-7-methanesulfonyl-trideca-1,7-diene-3,5,9,11-tetrayne|trans-7-Methylsulfonyl-tridecadien-(1.7)-tetrain-(3.5.9.11)	APRSPTXDJUGEAU-UHFFFAOYSA-N	C14H10O2S	1.01777	pos	0	551911	3.06866e+07	3.09406e+07
18-norabieta-8,11,13-trien-4-hydroperoxide|4-hydroperoxy-18-nor-dehydroabietane	SERPESJFVFFAKV-UHFFFAOYSA-N	C19H28O2	1.25223	pos	3.32915e+06	192878	7.43403e+06	3.08476e+07
2-Hydroxy-3,4,6-trimethoxychalcene	SHFNRUKISUMFMW-UHFFFAOYSA-N	C18H20O4	0.699652	neg	1.1023e+07	86942.9	1.10889e+07	3.08114e+07
Kanzonol I	RVKDAOFCDAPVGX-UHFFFAOYSA-N	C27H32O5	1.52684	pos	46562.1	6.33097e+06	9.91335e+06	3.07812e+07
(3aS,5R,5aS,7R,8S,9R,9aS,9bR)-dodecahydro-3a,7,8,9b-tetrahydroxy-5,8-dimethyl-1-methylidenenaphtho[2,1-b]furan-9-yl decanoate|strobilol K	IXJCXBMYVAABOI-UHFFFAOYSA-N	C25H42O7	1.55667	neg	16867.6	4.33161e+07	2.48805e+07	3.07354e+07
Dihydrolongicaudatine	UQQBZCDWWWIDMS-UHFFFAOYSA-N	C38H42N4O	1.6034	pos	0	3.48254e+07	3.06757e+07	3.04994e+07
Ilexolide A	FHYVXROQJGJCKH-UHFFFAOYSA-N	C35H54O7	1.31466	pos	1.41261e+07	161473	1.02986e+07	3.04806e+07
8-prop-1-en-2-yl-8,9-dihydrofuro[2,3-h]chromen-2-one	WLRXMMDATRQQNQ-UHFFFAOYSA-N	C14H12O3	1.02686	pos	1.14685e+07	87276.6	1.55389e+07	3.04434e+07
N-Acetylneuraminic acid	SQVRNKJHWKZAKO-UHFFFAOYSA-N	C11H19NO9	0.859311	pos	3.73798e+07	83649.1	2.21471e+07	3.03134e+07
8-hydroxy-2-n-nonyl-5,6,7,8-tetrahydrochromone	UCVKCMREOJPPIO-UHFFFAOYSA-N	C18H28O3	3.87173	pos	1.93006e+07	505853	1.10755e+07	3.02898e+07
3-Dehydro-15-deoxoeucosterol	KHSHJGYTLGFEMC-UHFFFAOYSA-N	C29H44O4	1.35053	neg	81546.9	6.8568e+07	1.06395e+07	3.02666e+07
nolinofuroside F 22-O-methyl ether	DREADZZMWCBWPA-UHFFFAOYSA-N	C46H76O18	2.1278	neg	1.88079e+07	0	1.16483e+07	3.02414e+07
1,4,10-trimethoxyanthracene-2-carbaldehyde	HJNRNEPJAUPFHZ-UHFFFAOYSA-N	C18H16O4	2.49291	neg	1.55956e+07	17736.4	1.53187e+07	3.01867e+07
deacetylmycoepoxydiene	RTPJTLADTXRGCF-UHFFFAOYSA-N	C14H16O4	0.569131	pos	3.7215e+07	687322	2.06328e+07	3.01097e+07
rel-2R,3R,5S-trihydroxy-6R-nonadecyltetrahydropyran-4-one	VUKJMDHUDPDVHS-UHFFFAOYSA-N	C24H46O5	0.7133	pos	0	1.67048e+07	1.08671e+07	3.00335e+07
Crocusatin H	FSOYBCXXCQPHMB-UHFFFAOYSA-N	C12H20O4	2.08946	neg	1.74884e+07	269900	1.29601e+07	2.99324e+07
Trigraecum	BJBKXYIIWYIZCX-UHFFFAOYSA-N	C16H12O4	1.27809	pos	1.80776e+07	478753	2.05793e+07	2.98394e+07
Nona-2,8-dienal	ZWSQVNVYDZKIEV-UHFFFAOYSA-N	C9H14O	1.98887	pos	663903	851138	1.63888e+07	2.96276e+07
Prosapogenin CP0	UXHIWGLCVSNCJC-UHFFFAOYSA-N	C35H56O8	2.19657	pos	1.35727e+07	26245.5	7.76752e+06	2.94307e+07
Macaflavanone B	NWOAUZRIIYJJIS-UHFFFAOYSA-N	C30H34O6	1.16881	pos	349535	4.04053e+06	2.35036e+07	2.94147e+07
CHEMBL465166	OLUUBKULUYLOQV-UHFFFAOYSA-N	C19H22O4	1.46082	pos	300284	0	1.07153e+07	2.92686e+07
Hamachilobene D	CPXUZWJJNBFVEE-UHFFFAOYSA-N	C24H38O6	2.41532	pos	0	3.80902e+06	334537	2.91623e+07
Montanin B	NQFQJZXPCAHOPD-UHFFFAOYSA-N	C19H24O5	0.794187	neg	1.48166e+07	358190	1.78766e+07	2.90742e+07
isopimaryl 2beta-acetyl-5alpha-methyl-cyclopenta-beta-carboxylate	BACJZVCXASSNGU-UHFFFAOYSA-N	C29H44O3	7.59257	pos	0	3.64369e+07	4.46395e+07	2.90648e+07
pestalotiopamide C	YJAKSKSMUOXRHW-UHFFFAOYSA-N	C13H21NO5	1.29825	pos	2.11803e+07	0	1.45937e+07	2.90598e+07
norleptosphol C	CSOXWJGKEHOXPA-UHFFFAOYSA-N	C18H30O5	0.39618	neg	3.74017e+06	209465	1.12186e+07	2.89754e+07
Histidinal	VYOIELONWKIZJS-UHFFFAOYSA-N	C6H9N3O	4.4694	pos	2.07374e+07	3.05424e+07	2.10748e+07	2.88602e+07
UNII-6LUU9T79QN	UPZZADAGKYWUKG-UHFFFAOYSA-N	C16H19NO5	2.58281	pos	23341.3	4.02369e+06	1.85503e+07	2.88411e+07
Lassiocarpine	FWZJUUDKKDGBNL-UHFFFAOYSA-N	C29H39NO6	1.54694	neg	0	2.36309e+07	1.15881e+07	2.88369e+07
18,19-epoxy-19alpha-hydroxy-cis-cleroda-3,13(14)-diene-15,16-olide	NFAVXFOQTAQQBH-UHFFFAOYSA-N	C20H28O4	1.2054	pos	2.64968e+06	944226	9.26255e+06	2.8796e+07
Yunnadelphinine	QUIBNSQWVBDPPR-UHFFFAOYSA-N	C24H35NO6	0.0555824	pos	0	1.25754e+07	7.23616e+06	2.862e+07
Chromomoric acid	JTVFMTUJWPGXRA-UHFFFAOYSA-N	C18H28O4	1.65118	pos	1.59661e+07	869876	2.36833e+07	2.84268e+07
Anthranilic acid	RWZYAGGXGHYGMB-UHFFFAOYSA-N	C7H7NO2	2.64673	neg	1.71e+07	1.74172e+06	1.50654e+07	2.84164e+07
(5S)-5-hydroxy-1,7-diphenylheptan-3-one	CCNKTMMNRPJQHV-SFHVURJKSA-N	C19H22O2	1.63071	pos	4.33984e+06	1.71118e+06	2.06724e+07	2.82941e+07
Cordiaquinol K	OWESAJYPRMLEGK-UHFFFAOYSA-N	C16H20O4	0.649754	pos	26833.6	5.56306e+07	3.96771e+07	2.82873e+07
1-(2-hydroxy-6-methylphenyl)-3-ethenyl-3,7,11-trimethyl-6,7-dodecadienone	UFLUYCOKQUZAAI-UHFFFAOYSA-N	C24H34O2	0.529445	neg	2.72482e+07	2.66752e+07	2.50675e+07	2.82281e+07
(13E)-octadec-13-en-9,11-diynoic acid|13-Octadecen-9,11-diinsaeure|Exocarpic acid|Octadec-13t-en-9,11-diinsaeure|octadec-13t-ene-9,11-diynoic acid|Octadeca-13t-en-9,11-diinsaeure|trans-Octadec-13-en-9,11-diinsaeure	ACHMRCSARDWYGC-UHFFFAOYSA-N	C18H26O2	0.963667	pos	2.02996e+06	625214	3.04498e+07	2.81763e+07
1-O-(E)-feruloyl-3-alpha-D-glucuronosylglycerol	OXRPUBQOXZHCQX-UHFFFAOYSA-N	C19H24O12	0.832595	neg	1.46519e+07	0	9.02021e+06	2.81054e+07
EPA;Timnodonic acid	JAZBEHYOTPTENJ-UHFFFAOYSA-N	C20H30O2	0.741042	neg	0	5.07495e+07	2.22123e+07	2.80946e+07
6-{[5,7-dihydroxy-2-(4-hydroxy-3-methoxyphenyl)-4-oxo-4H-chromen-3-yl]oxy}-3,4,5-trihydroxyoxane-2-carboxylic acid	VVZWHOMBDMMRSC-UHFFFAOYSA-N	C22H20O13	2.08774	neg	2.85235e+07	672645	2.63007e+07	2.80617e+07
APIGENIN DIMETHYL ETHER	LZERJKGWTQYMBB-UHFFFAOYSA-N	C17H14O5	0.498268	pos	1.68948e+07	0	1.67651e+07	2.8047e+07
Prunetin	KQMVAGISDHMXJJ-UHFFFAOYSA-N	C16H12O5	0.940418	pos	1.48918e+07	112284	1.20099e+07	2.7991e+07
Destruxin Ed1	WSFGUSJVLMZWTL-UHFFFAOYSA-N	C30H51N5O9	11.3492	pos	0	2.29563e+07	2.51983e+07	2.79229e+07
Sarcaglaboside B	IXPRKLBCFLYFKW-UHFFFAOYSA-N	C21H28O8	0.851412	pos	269877	1.84106e+06	5.12263e+06	2.78364e+07
Ougenin	PGEJLQOKKPXIBE-UHFFFAOYSA-N	C17H16O6	2.75422	neg	1.93302e+07	37626.5	1.51813e+07	2.78211e+07
Momordol	HDAGCVMZABLHLE-UHFFFAOYSA-N	C26H48O5	0.108711	pos	0	1.88431e+07	1.18769e+07	2.77957e+07
Shakuchirin	VHLRCBWDSVRKOW-UHFFFAOYSA-N	C25H28O11	1.19171	neg	111815	31391.5	1.78417e+07	2.76014e+07
Hosenkoside K	JWINIHBXRZXFKL-SGBJXWCQSA-N	C54H92O25	4.17825	pos	0	2.61801e+07	2.72717e+07	2.73847e+07
2-Acetolactate	NMDWGEGFJUBKLB-UHFFFAOYSA-N	C5H8O4	3.68243	neg	7.99073e+06	7.94605e+06	1.02384e+07	2.73602e+07
NSC 8125	MAZWDMBCPDUFDJ-UHFFFAOYSA-N	C12H20O4	0.36215	pos	212787	0	1.8214e+07	2.72323e+07
Manglieside D	REANNYKUXJMZAD-UHFFFAOYSA-N	C26H34O11	4.58823	neg	0	0	2.48507e+06	2.72193e+07
Methoxychelidonine	FYMTWGUKLAVFLL-UHFFFAOYSA-N	C21H21NO6	8.54217	pos	305869	0	4.6263e+06	2.71624e+07
Oxyresveratrol	PDHAOJSHSJQANO-OWOJBTEDSA-N	C14H12O4	1.12041	pos	1.0349e+07	223097	1.51009e+07	2.71423e+07
1-(5-methoxyfuran-2-yl)ethanone	VJRMEROKMGZTOZ-UHFFFAOYSA-N	C7H8O3	3.1907	pos	1.93325e+06	1.16416e+06	6.10743e+08	2.71227e+07
Abutiloside C	FEJQPEKPBNLXKM-UHFFFAOYSA-N	C44H74O17	0.964167	neg	1.47339e+07	0	8.96354e+06	2.70881e+07
CHEMBL463801	YDWYZJSYJDBYIX-UHFFFAOYSA-N	C18H20O3	0.216871	pos	7.48945e+06	486921	1.06704e+07	2.70621e+07
Vitrofolal E	ASJBFNXTDMUMBC-UHFFFAOYSA-N	C19H16O5	1.12876	pos	9.00472e+06	26381.3	1.49911e+07	2.70359e+07
NSC383483	QCBPBADGYXFZSW-UHFFFAOYSA-N	C11H14O8	2.75151	pos	6.46879e+06	1.90129e+08	2.12419e+08	2.68532e+07
Protosappanin A	MUKYVRVYBBYJSI-UHFFFAOYSA-N	C15H12O5	1.28693	neg	1.40319e+07	19192.4	1.72384e+07	2.6799e+07
4'-O-beta-D-glucopyranosyl rosmarinic acid	MRIIYMYNFFDCQF-UHFFFAOYSA-N	C24H26O13	0.477013	neg	3.06182e+07	0	1.63023e+07	2.66808e+07
Glucoheptonic acid	KWMLJOLKUYYJFJ-VFUOTHLCSA-N	C7H14O8	2.23606	pos	1.77296e+06	1.16898e+08	2.83803e+07	2.65986e+07
Ricinoleic acid (purity≥99%)	WBHHMMIMDMUBKC-QJWNTBNXSA-N	C18H34O3	0.288428	pos	388531	2.86444e+07	2.16807e+07	2.65948e+07
Dehydroandrographolide	YIIRVUDGRKEWBV-FZOOCBFYSA-N	C20H28O4	2.08737	pos	5.89834e+06	458465	1.03939e+07	2.65593e+07
Correantoside	ADQFGOUIRSRRTQ-UHFFFAOYSA-N	C27H32N2O8	0.643936	neg	4.86959e+07	0	1.01686e+07	2.65442e+07
Ketoleucine	BKAJNAXTPSGJCU-UHFFFAOYSA-N	C6H10O3	0.738424	neg	2.59168e+06	4.92301e+06	1.06201e+07	2.65133e+07
Succinic semialdehyde	UIUJIQZEACWQSV-UHFFFAOYSA-N	C4H6O3	4.16609	neg	3.94213e+06	5.12207e+06	2.54597e+07	2.63894e+07
DTXSID00773904	IRSGEMDUJNQUMV-UHFFFAOYSA-N	C24H36O6	1.05387	pos	412791	3.01222e+07	2.54457e+07	2.63588e+07
Indoxylsulfate	BXFFHSIDQOFMLE-UHFFFAOYSA-N	C8H7NO4S	1.38882	neg	0	2.91532e+07	1.38294e+07	2.6311e+07
Hymecromone	HSHNITRMYYLLCV-UHFFFAOYSA-N	C10H8O3	2.12584	pos	3.26307e+06	2.09912e+07	2.17839e+06	2.6305e+07
pyranonigrin A	JHRSKIPBFMBFDI-UHFFFAOYSA-N	C10H9NO5	0.45773	neg	3.96431e+06	0	1.45566e+07	2.62563e+07
SCHEMBL19413832	ANCVHDRNDJRUOT-UHFFFAOYSA-N	C22H26O9	0.980685	pos	1.02126e+07	10204	1.07564e+07	2.61814e+07
5?-Cholanic Acid-3?-ol-6-one	JWZBXKZZDYMDCJ-UHFFFAOYSA-N	C24H38O4	0.325558	pos	23899.5	3.76522e+07	1.74154e+07	2.60365e+07
Gypothamniol	DWFVTYSPFRBHTG-UHFFFAOYSA-N	C25H30O5	0.0122819	neg	0	9.88205e+06	3.67724e+06	2.60212e+07
Alprenolol (hydrochloride)	PAZJSJFMUHDSTF-UHFFFAOYSA-N	C15H23NO2	1.1424	pos	1.39745e+07	2.13023e+06	5.50932e+06	2.59837e+07
potanisine B	OZQBBQXPYSZCGZ-UHFFFAOYSA-N	C36H46N2O11	1.99324	neg	0	2.81655e+06	3.95543e+07	2.59377e+07
bis-(4-hydroxybenzyl)sulfide	OEISQDWSEZCYNH-UHFFFAOYSA-N	C14H14O2S	0.0495584	pos	1.83265e+07	2.37559e+06	1.64731e+07	2.59164e+07
Avocadyne Acetate	JAKAZHIACKJNNB-UHFFFAOYSA-N	C19H34O4	0.810736	pos	0	1.08028e+07	8.98096e+06	2.56402e+07
1,5-Dihydroxy-9,10-dioxo-9,10-dihydroanthracene-3-carboxylic acid ethyl ester	NAPMVPUVSANYCE-UHFFFAOYSA-N	C17H12O6	1.12745	pos	1.46915e+07	96017.8	1.72452e+07	2.56217e+07
O-octanoylcarnitine	CXTATJFJDMJMIY-UHFFFAOYSA-N	C15H29NO4	0.494549	pos	9800.8	1.96683e+07	1.82752e+07	2.54845e+07
(4alpha,5alpha)-4-Hydroxy-11(13)-amorphen-12,5-olide|Artemislactone|Quinghaosu V	YDQMBNMUQASHKN-UHFFFAOYSA-N	C15H22O3	0.812944	neg	43827.2	1.71647e+07	1.60569e+07	2.54394e+07
3-methyl-8,9-methylenedioxycoumestone|flemmichapparin C	WPEXWIYRWVPINB-UHFFFAOYSA-N	C17H10O5	1.09721	pos	1.48645e+07	390155	1.55504e+07	2.54286e+07
Heliobuphthalmin	YKLDSNGNWJIDLS-UHFFFAOYSA-N	C22H22O8	0.346284	pos	1.17348e+07	0	1.25852e+07	2.54241e+07
Neohydroxyaspergillic Acid	QTTAJMQGQJRLDK-UHFFFAOYSA-N	C12H20N2O3	1.71705	pos	3.5654e+07	7.53947e+06	1.59798e+07	2.53587e+07
(9Z,11E,13E,15Z)-4-Oxo-9,11,13,15-octadecatetraenoic acid	ZYOSGENSARGRME-WYVWLRFESA-N	C18H26O3	1.17199	pos	2.75836e+07	250392	8.32787e+06	2.52898e+07
Pinocembrin	URFCJEUYXNAHFI-UHFFFAOYSA-N	C15H12O4	1.12159	pos	1.53485e+07	291354	1.36142e+07	2.52502e+07
6''-O-Acetylglycitin	DUBPGEJGGVZKDD-PFKOEMKTSA-N	C24H24O11	1.6809	neg	1.45675e+07	24363.2	1.21261e+07	2.52276e+07
cis-8,10-di-n-propyllobelidiol hydrochloride dihydrate	BEHRYCYNRCQBOK-UHFFFAOYSA-N	C16H33NO2	0.600523	pos	2.54918e+07	2.31905e+07	2.69948e+07	2.52275e+07
Holacurtinol	SFUVPIJMDPWZBZ-UHFFFAOYSA-N	C28H45NO6	1.96658	pos	0	399339	1.77923e+06	2.51815e+07
12,13-dihydroxyoctadec-9-enoic acid	CQSLTKIXAJTQGA-UHFFFAOYSA-N	C18H34O4	0.579955	neg	8.09723e+06	896986	1.4687e+07	2.51673e+07
O-Methylviriditin	XSMAAHDDIFGBIA-UHFFFAOYSA-N	C19H31NO3	2.23579	pos	175074	48578.3	1.56805e+07	2.51444e+07
8-hydroxy-2-(6'-phenylhexyl)-5,6,7,8-tetrahydrochromone	XHSZGHYQJFZVDN-UHFFFAOYSA-N	C21H26O3	1.59607	neg	1.53375e+07	1.21402e+07	3.70578e+07	2.51286e+07
(10Z,14E,16E)-10,14,16-Octadecatrien-12-ynoic acid	KDVOULUCGQGVQH-IUDSIRJBSA-N	C18H26O2	0.778979	pos	338958	475611	1.17453e+07	2.50466e+07
Belamcandol B	NKOPRUNFJQCUCF-UHFFFAOYSA-N	C22H36O2	0.394991	neg	0	4.16688e+07	2.41931e+07	2.49801e+07
Decanoylcarnitine	LZOSYCMHQXPBFU-UHFFFAOYSA-N	C17H33NO4	1.51284	pos	304405	2.14025e+07	1.80175e+07	2.49725e+07
5-oxooctanal	NKKMPIXWEPUSCG-UHFFFAOYSA-N	C8H14O2	3.8204	pos	6.99268e+06	971623	2.16731e+07	2.49514e+07
methyl ent-8(R),15(S)epoxy-12beta-acetoxy-16-hydroxypimar-9(11)-en-19-oate	AXKGKFUYPFXADG-UHFFFAOYSA-N	C23H34O6	0.865989	pos	2.5002e+06	7.63542e+07	1.19112e+07	2.47816e+07
Inoscavin B	RNGFLTFOEGMRRY-UHFFFAOYSA-N	C24H20O8	1.5569	pos	193186	9.46149e+06	3.08676e+07	2.47667e+07
methyl (2Z,11Z,1'R,2'R)-2-(1',2'-dihydroxypropyl)tetradeca-2,11-dien-13-ynoate	XGTQIFIOKWONJJ-UHFFFAOYSA-N	C18H28O4	1.47967	pos	1.28132e+07	0	1.12167e+07	2.46736e+07
Sachalinol C	IHHQHUMLWMNJGX-UHFFFAOYSA-N	C10H18O3	2.00815	pos	197763	167576	1.13335e+07	2.46655e+07
Caseobliquin A	NVVFTAMNEDAOEH-UHFFFAOYSA-N	C33H40O10	0.455647	pos	8821.35	1.03291e+07	1.70805e+07	2.46594e+07
PLATYCARYNOL	YYFQVTMYGIIENR-UHFFFAOYSA-N	C21H26O4	0.800188	pos	83640.3	65968.7	1.27751e+07	2.463e+07
Biphenyl-4,4'-dicarboxylic acid diheptyl ester	FZHRFXVOMMSJKS-UHFFFAOYSA-N	C28H38O4	0.387489	pos	350107	2.49491e+07	2.4825e+07	2.4603e+07
ADENINE	GFFGJBXGBJISGV-UHFFFAOYSA-N	C5H5N5	4.52659	pos	1.01264e+07	120893	9.06322e+06	2.45993e+07
(4S,5Z,6S)-4-(2-methoxy-2-oxoethyl)-5-[2-[(E)-3-phenylprop-2-enoyl]oxyethylidene]-6-[(2S,3R,4S,5S,6R)-3,4,5-trihydroxy-6-(hydroxymethyl)oxan-2-yl]oxy-4H-pyran-3-carboxylic acid	JGHUOJAZXGSFRI-HOWDAYCMSA-N	C26H30O13	0.304918	pos	1.45719e+07	58270.5	9.82536e+06	2.45238e+07
Phthalic acid	XNGIFLGASWRNHJ-UHFFFAOYSA-N	C8H6O4	0.235544	pos	1.64809e+07	1.59031e+07	2.46514e+07	2.44282e+07
2-(5,6-Dihydroxy-5,6-dihydro-cyclopenta[c]furan-4-yl)acetic acid	DTHUVZQMVMVXNB-UHFFFAOYSA-N	C9H10O5	2.66575	neg	1.53814e+07	68568	1.6327e+07	2.43986e+07
Ginsenoside Rh4	OZTXYFOXQFKYRP-RGVLZGJSSA-N	C36H60O8	4.78874	pos	77785.7	2.53341e+07	2.10317e+07	2.43761e+07
Abacopterin D	BNUJOMJNLGIKGM-UHFFFAOYSA-N	C30H38O15	0.100686	neg	1.50919e+07	0	8.86441e+06	2.4132e+07
3alpha-angeloyloxy-15,18-dihydroxy-ent-labda-8(17),13E-diene	GKKYSIXTPHRNIV-UHFFFAOYSA-N	C25H40O4	1.07359	pos	0	1.72012e+07	2.0208e+07	2.40762e+07
N-Acetylhistamine	XJWPISBUKWZALE-UHFFFAOYSA-N	C7H11N3O	2.37866	pos	1.4301e+07	2.27491e+07	2.64251e+07	2.40448e+07
3-hydroxy-8beta-isobutyryloxydehydroleucodin	HQZANFZSMKYQLR-UHFFFAOYSA-N	C19H24O5	0.358444	neg	9.32959e+06	255816	1.24095e+07	2.40307e+07
2-Nonynoic acid	ZAWLBSATNLQTON-UHFFFAOYSA-N	C9H14O2	1.98099	pos	2.06287e+07	324814	9.28008e+06	2.39831e+07
methyl octadec-11-enoate	PVVODBCDJBGMJL-UHFFFAOYSA-N	C19H36O2	1.30639	pos	0	1.87869e+07	3.88025e+07	2.38259e+07
1,3,7,8-tetrahydroxy-2-methoxy-9H-xanthen-9-one|1,3,7,8-tetrahydroxy-2-methoxyxanthone|rhodanthenone B	DSPBCPXFQUGVQJ-UHFFFAOYSA-N	C14H10O7	2.50015	pos	0	2.55164e+07	2.38706e+07	2.36125e+07
(-)-(E)-1-(4-Hydroxyphenyl)-7-phenyl-6-hepten-3-ol	PXPIJNMPDAFWSF-XBXARRHUSA-N	C19H22O2	0.356079	pos	28357.7	2.24699e+07	9.41781e+06	2.34847e+07
Picramnioside A	ONFRLXXHGVGGCD-UHFFFAOYSA-N	C27H24O10	0.488793	neg	588117	4641.9	1.8136e+07	2.34685e+07
Ac-DL-Trp-OH	DZTHIGRZJZPRDV-UHFFFAOYSA-N	C13H14N2O3	0.288121	neg	3.66349e+07	486964	9.11348e+06	2.34195e+07
Anguivioside C	GREXOESHYXPSMM-UHFFFAOYSA-N	C44H70O17	0.88586	neg	9.82045e+06	0	8.83563e+06	2.34083e+07
Delta9-trans-(13R)-Trisphorsaeure C-methylester	KVBYPCQTYBIUJI-UHFFFAOYSA-N	C19H28O4	0.540873	pos	93688.6	1.33698e+06	1.36792e+07	2.32901e+07
2-Hexenedioic acid	HSBSUGYTMJWPAX-UHFFFAOYSA-N	C6H8O4	2.28636	pos	1.20957e+08	7.37565e+06	2.19365e+07	2.32473e+07
hederagenin 3-O-beta-D-glucuronopyranosyl methyl ester 28-O-beta-D-glucopyranoside|hederagenin 3-O-beta-D-glucuronopyranosyl methyl ester-28-O-beta-D-glucopyranoside	GHIXKZFGTGUZAR-UHFFFAOYSA-N	C43H68O15	0.155381	pos	1.00532e+07	111982	8.84608e+06	2.32066e+07
DTXSID50827244	WRCGSWXFJPRBPO-UHFFFAOYSA-N	C19H16O3	2.72184	pos	1.254e+07	0	9.95741e+06	2.31851e+07
2,2,2',2'-tetramethylspiro[1,3-dioxolane-4,6'-3a,4,7,7a-tetrahydro-[1,3]dioxolo[4,5-c]pyran]-7'-ol	NFHXOQDPQIQPKT-UHFFFAOYSA-N	C12H20O6	1.23136	neg	7.16748e+06	17224.4	1.26953e+07	2.30174e+07
qingyangshengenin a	RSTNGBYEJQYFEJ-UHFFFAOYSA-N	C49H72O17	2.78332	pos	1.1213e+07	0	9.31067e+06	2.2904e+07
Neocaesalpin I	PXLAMDZQSUFKAD-UHFFFAOYSA-N	C20H26O4	23.9734	pos	2.13304e+07	377782	9.56976e+06	2.28963e+07
KS IV	ZSKDVJYWOHBGNI-UHFFFAOYSA-N	C17H12O6	1.33526	pos	9.32235e+06	92273.4	1.43694e+07	2.28848e+07
Gibberellic acid	IXORZMNAPKEEDV-OBDJNFEBSA-N	C19H22O6	1.33004	pos	157807	22250.5	1.59916e+07	2.28733e+07
(Z)-Octadec-12-ene-8,10-diynoic acid	RJGPWUHEMVYSDA-UHFFFAOYSA-N	C18H26O2	1.08026	pos	2.39628e+06	584189	1.39381e+07	2.28326e+07
Tectochrysin	IRZVHDLBAYNPCT-UHFFFAOYSA-N	C16H12O4	1.15976	pos	9.85021e+06	332719	1.06605e+07	2.28138e+07
Strobal	VCUHLFQRJCWTIG-UHFFFAOYSA-N	C20H30O	0.19561	pos	42222.9	3.4909e+07	1.83542e+07	2.2795e+07
Isoxanthohumol	YKGCBLWILMDSAV-UHFFFAOYSA-N	C21H22O5	1.01365	neg	160987	2.21049e+07	2.84918e+07	2.27121e+07
3beta-malonyloxy-15-(3-methylvaleryloxy)-ent-labda-7,13E-diene|3beta-malonyloxy-15-<3-methylvaleryloxy>-ent-labda-7,13E-diene	LNTHUFPQIZBBTI-UHFFFAOYSA-N	C29H46O6	0.60397	neg	10623.6	2.79934e+07	2.66512e+06	2.27081e+07
[10]-Paradol	XNBUKRQGYHYOOP-UHFFFAOYSA-N	C21H34O3	2.05571	pos	5658.38	1.12592e+07	2.55228e+07	2.26854e+07
N-Phenylacetylaspartic acid	SVFKZPQPMMZHLZ-UHFFFAOYSA-N	C12H13NO5	0.438056	pos	3.43691e+06	1.22954e+06	3.62392e+07	2.26537e+07
methyl 4-[(E)-2-acetyl-4-oxoundec-1-enyl]-6-propylnicotinate	IWAPLOITRVNZAP-UHFFFAOYSA-N	C23H33NO4	2.00186	neg	0	2.08432e+07	1.65478e+07	2.2644e+07
4-methylfuran-2-carboxylic acid	UOJBPVNHCNJBSQ-UHFFFAOYSA-N	C6H6O3	2.56056	pos	1.58035e+07	1.1932e+07	3.23646e+07	2.2632e+07
trans-Caffeic acid	QAIPRVGONGVQAS-UHFFFAOYSA-N	C9H8O4	0.192263	neg	8.45199e+06	0	1.19913e+07	2.26263e+07
(2E)-2-dodecylidene-3-hydroxy-4-methoxy-4-methylbutanolide|(2E,3R,4S)-2-dodecylidene-3-hydroxy-4-methoxy-4-methylbutanolide|litseakolide H	HIEAMEODUHHHLB-UHFFFAOYSA-N	C18H32O4	0.439371	neg	664433	4.96879e+06	1.62654e+07	2.25769e+07
6alpha,11,12,16-tetrahydroxy-7-oxoabieta-8,11,13-triene|6alpha,11,12,16-tetrahydroxyabieta-8,11,13-trien-7-one|Nellionol	UEKAWZIDGBZQOP-UHFFFAOYSA-N	C20H28O5	1.30986	pos	3.32851e+07	525650	1.28579e+07	2.25548e+07
FT-0665152	ICFIZJQGJAJRSU-UHFFFAOYSA-N	C49H74O4	1.27481	pos	0	3.62431e+07	1.93108e+07	2.25468e+07
Choline	OEYIOHPDSNJKLS-UHFFFAOYSA-N	C5H14NO+	1.94672	pos	489341	2.99337e+07	2.13542e+07	2.25285e+07
Sorokinianin	PTGFDIFCKGMAJK-UHFFFAOYSA-N	C18H28O4	1.47672	pos	1.50083e+07	65938.6	9.87033e+06	2.24712e+07
emindole SB beta-mannoside	RLMHLVYKLURACD-UHFFFAOYSA-N	C34H49NO6	2.03249	pos	3035.53	1.37802e+08	6.40945e+07	2.24355e+07
3alphaC-glucopyranosil-4,5-dihydroxy-2-methoxybenzoic acid	LLSMCWPHJMCOFO-UHFFFAOYSA-N	C14H18O10	0.441327	pos	1.351e+06	3.14005e+07	3.95408e+08	2.24233e+07
foliol acetonide	HDJUHCGQVBSWNI-UHFFFAOYSA-N	C23H36O3	1.4934	pos	44896.5	2.48193e+07	3.59227e+07	2.23232e+07
5-hydroxyfurfural	QVYAWBLDJPTXHS-UHFFFAOYSA-N	C5H4O3	1.82183	neg	1.53564e+07	1.24462e+06	2.69218e+07	2.23208e+07
DL-Glutamine	ZDXPYRJPNDTMRX-UHFFFAOYSA-N	C5H10N2O3	0.412064	pos	4.03041e+07	1.18766e+07	1.80445e+07	2.22778e+07
2-(3,4-dihydroxyphenyl)ethyl O-alpha-L-rhamnopyranosyl(1->3)-O-[beta-D-glucopyranosyl(1->6)]-beta-D-glucopyranoside|kankanoside F	ASDOWCHSFUIEHY-UHFFFAOYSA-N	C26H40O17	1.42274	pos	1.28034e+06	0	1.13189e+07	2.22157e+07
Mosloflavone	SIVAITYPYQQYAP-UHFFFAOYSA-N	C17H14O5	0.0729827	pos	1.07327e+06	209880	8.30007e+06	2.21982e+07
hederagenin 23-O-beta-D-glucopyranoside (CP2a)|Prosapogenin CP2a	YVGKRXPSSLCPSA-UHFFFAOYSA-N	C36H58O9	1.23836	pos	1.27746e+07	60592.2	1.82835e+07	2.21301e+07
Gypenoside XXV	KHPWSKNLAFECBO-NSMVKXLTSA-N	C47H78O18	2.93569	pos	1.9202e+07	2.06544e+06	0	2.20492e+07
12-Oxo-cis-10,15-phytodiensaeure|12-oxophytodienoic acid methyl ester	AXDNONFPXLVMOY-UHFFFAOYSA-N	C19H30O3	0.804564	pos	199653	378036	1.88791e+07	2.19233e+07
(1E,4S,5E,7R)-7-O-beta-D-glucopyranosylgermacra-1(10),5-diene	HZEFDCHHTPMSIO-UHFFFAOYSA-N	C21H36O6	1.07906	neg	53421.7	3.43313e+07	1.37515e+07	2.19175e+07
(()-Nieshoutol|6-hydroxy-5-methoxy-8,9,9-trimethyl-8,9-dihydro-furo[2,3-h]chromen-2-one|Nieshoutol	TVIZOIWEODXFIA-UHFFFAOYSA-N	C15H16O5	1.231	neg	6.78262e+06	167393	9.15393e+06	2.18871e+07
N-Acetyl polyveoline|N-acetylpolyveoline	OGSHVAKUSGJWTH-UHFFFAOYSA-N	C25H35NO2	0.394557	neg	227625	2.65697e+07	2.07848e+07	2.18668e+07
SCHEMBL16453657	OXENTHYAVBFFDI-UHFFFAOYSA-N	C18H20O6	1.34111	pos	6.67128e+06	0	9.50611e+06	2.18284e+07
justicidinoside A	HVXLNKUTDGPTBL-UHFFFAOYSA-N	C28H28O13	2.95048	pos	1.74867e+07	0	1.17823e+07	2.17712e+07
ar-dihydroxyepijuvabione	SVYGEXBYZBSPNY-UHFFFAOYSA-N	C16H22O5	1.01338	pos	3.35734e+06	439565	1.33642e+07	2.17371e+07
Hypochoeroside K	VGMXDSYTGIFDBM-UHFFFAOYSA-N	C21H34O7	1.28017	pos	417523	124201	1.39104e+07	2.17235e+07
Aabamidin|Aobamidin|aobamidine	XTKRQNDALPUYMD-UHFFFAOYSA-N	C21H19NO6	0.898101	pos	108109	0	1.81144e+07	2.17142e+07
methyl 3-oxo-1alpha,19alpha,28-trihydroxyurs-12-en-24-oate	YXRUFFIOSDHTIO-UHFFFAOYSA-N	C31H48O6	13.7601	pos	0	1.98411e+07	1.60815e+07	2.17108e+07
(1RS,5SR,6RS,Z)-6-(2'-pentenyl)-2-oxabicyclo<3.3.0>octan-3-one (tuberolide)|(1RS,5SR,6RS,Z)-6-(2'-pentenyl)-2-oxabicyclo[3.3.0]octan-3-one (tuberolide)|Tuberolide	DCQZMWBXPSZSHE-UHFFFAOYSA-N	C12H18O2	1.55271	pos	1.05105e+07	1.38043e+06	1.32478e+06	2.17043e+07
Nonivamide	RGOVYLWUIBMPGK-UHFFFAOYSA-N	C17H27NO3	2.24674	pos	2.58686e+07	0	5.99195e+06	2.15823e+07
12-O-Benzoylisolineolon	QYGCNWGDTWSRCZ-UHFFFAOYSA-N	C28H36O6	1.48137	pos	1.43819e+07	16476	9.10911e+06	2.15815e+07
Benz[b]indeno[1,2-e]pyran-6,11-dione	CXXCRLLJRGEAJV-UHFFFAOYSA-N	C16H8O3	0.0469541	pos	1.67293e+07	546557	1.52046e+07	2.15427e+07
3-HYDROXYBENZOIC ACID	IJFXRHURBJZNAO-UHFFFAOYSA-N	C7H6O3	2.3957	pos	1.42198e+07	141057	1.88729e+07	2.15082e+07
NERIDIENONE B	NCBLKWGLSQARQJ-UHFFFAOYSA-N	C21H28O4	0.988541	pos	182841	54481.8	1.58339e+07	2.14976e+07
Soyasapogenol E base + O-HexA-Hex-dHex	CROUPKILZUPLQA-UHFFFAOYSA-N	C48H76O18	2.61914	pos	1.04524e+07	90430.1	1.02475e+07	2.14582e+07
Acetyl-11-keto-beta-boswellic acid	HMMGKOVEOFBCAU-XUEZKKGGSA-N	C32H48O5	2.7871	pos	72011.4	2.62104e+07	2.10494e+07	2.14066e+07
Peperinic acid	LBNWZGLSMCTAQB-UHFFFAOYSA-N	C10H14O3	1.22118	pos	402787	2.1034e+07	1.19293e+07	2.13885e+07
Inermin	HUKSJTUUSUGIDC-ZBEGNZNMSA-N	C16H12O5	0.765033	neg	6.10682e+06	699256	1.72653e+07	2.13613e+07
Angelicin	XDROKJSWHURZGO-UHFFFAOYSA-N	C11H6O3	0.957267	pos	8.76757e+06	6.6101e+06	8.73255e+06	2.13538e+07
Dimethicone	UQEAIHBTYFGYIE-UHFFFAOYSA-N	C6H18OSi2	2.8019	pos	1.92364e+07	2.07519e+07	2.58485e+07	2.13288e+07
3-oxo-1alpha-hydroxy-2-nor-1,3-cycloolean-12-en-30-oic acid|dysoxyhainic acid B	IEZSXISBYKLLFM-UHFFFAOYSA-N	C29H44O4	0.386371	pos	18891.5	4.81461e+07	7.69475e+06	2.12078e+07
Biochanin A 7-(6-methylmalonylglucoside)	QYBKKYHYZHUTOL-UHFFFAOYSA-N	C26H26O13	0.709989	pos	1.89092e+06	76708.2	2.85528e+07	2.12041e+07
[8]-Paradol	TYQRTQZWHUXDLG-UHFFFAOYSA-N	C19H30O3	1.93568	pos	792804	202009	1.03148e+07	2.12036e+07
(3aR,3bS,4S,5R,6R,6aS,9aR,9bR,10R,11R,11aS)-11-(benzyloxy)-3a,3b,4,5,6,6a,9a,10,11,11a-decahydro-4,5,6,6a-tetrahydroxy-5-(hydroxymethyl)-8,10-dimethyl-11a-(1-methylethenyl)-2-phenyl-7H-2,9b-epoxyoxiazuleno[5,4-e]-1,3-benzodioxol-7-one|yuanhuaoate B	VVQJQELTMRCJIO-UHFFFAOYSA-N	C34H36O11	0.788032	pos	509635	47106	2.9597e+07	2.12013e+07
Flavescenone B	VPKPEWORLNRATH-UHFFFAOYSA-N	C21H18O7	2.15344	pos	1.33679e+08	2.62786e+07	3.03609e+07	2.11877e+07
cyclocerberidol-3-O-beta-D-allopyranoside	ZOJLBJUHVQCCCZ-UHFFFAOYSA-N	C15H26O9	0.636305	neg	1.33993e+06	133166	1.80961e+07	2.11758e+07
12-HETE	ZNHVWPKMFKADKW-FYMOKONMSA-N	C20H32O3	1.98428	neg	3358.81	1.56666e+07	1.31284e+07	2.11357e+07
25-O-methoxycimigenol 3-O-alpha-L-arabinopyranoside|25-O-methylcimigenol-3-O-alpha-L-arabinopyranoside|cimiracemoside B	LAOCOVISLMUJNC-UHFFFAOYSA-N	C36H58O9	2.11656	pos	1.49644e+07	871683	1.17738e+07	2.11161e+07
Hydroxyespintanol	HRCWOXUPPIISQE-UHFFFAOYSA-N	C12H18O4	1.71689	neg	1.53826e+07	668966	1.10622e+07	2.11136e+07
Nepetoidin A	FOWPKLFOIDTRMY-UHFFFAOYSA-N	C17H14O6	1.81486	neg	2.50656e+07	0	1.93284e+07	2.1067e+07
Tetrahydrobungeanool	GJDPGFHVEKFXEZ-UHFFFAOYSA-N	C18H33NO2	1.15101	pos	8.47357e+07	3.06669e+07	2.5266e+07	2.09351e+07
Dihydrokaempferol	PADQINQHPQKXNL-UHFFFAOYNA-N	C15H12O6	1.22451	neg	9.55302e+06	129711	1.37348e+07	2.09331e+07
(2beta,3alpha,4beta,5beta)-2,3,4-Trihydroxypregn-16-en-20-one|2beta,3alpha,4beta-Trihydroxy-5beta-pregn-16-en-20-on	GKCFQKGBOYKBGP-UHFFFAOYSA-N	C21H32O4	0.936501	neg	0	1.64368e+07	1.79544e+07	2.09291e+07
2''Z-liacylinindrolide	GUJMGTHIANKKGJ-UHFFFAOYSA-N	C24H30O7	1.1617	neg	265906	1.43453e+07	1.97969e+07	2.09128e+07
Nordihydrocapsaicin	VQEONGKQWIFHMN-UHFFFAOYSA-N	C17H27NO3	0.953708	pos	1.03519e+07	6360.67	2.33595e+07	2.08405e+07
Daphnigraciline	NEGWEUWYIYCILR-UHFFFAOYSA-N	C23H35NO4	1.72561	neg	0	1.8162e+07	1.2207e+07	2.0803e+07
7-Gingerol	BJUICGMKNZDPOT-UHFFFAOYSA-N	C18H28O4	1.32308	pos	2.15306e+07	140054	7.19281e+06	2.07343e+07
Flavone base + 3O, 1MeO	MBNGWHIJMBWFHU-UHFFFAOYSA-N	C16H12O6	1.18368	neg	1.61745e+07	26975.3	1.25822e+07	2.06792e+07
2-Sterpurene-4,15-diol|4,12-Dihydroxysterpurene	LQERXRGQUOMUGB-UHFFFAOYSA-N	C15H24O2	0.528058	pos	342985	2.66502e+06	1.12824e+07	2.0628e+07
7-[3-[(2R,3R,4R)-3,4-dihydroxy-4-(hydroxymethyl)oxolan-2-yl]oxy-4,5-dihydroxy-6-(hydroxymethyl)oxan-2-yl]oxy-3-(4-methoxyphenyl)chromen-4-one	TUUBGLDJKKCMRH-NNNVMGKSSA-N	C27H30O13	1.99851	pos	100456	143934	1.14749e+07	2.05875e+07
Schizotenuin A	KROVXXIIXUFKOO-UHFFFAOYSA-N	C36H28O16	3.34653	pos	8.51473e+07	3.21714e+06	4.18199e+07	2.05444e+07
Beta-Caryophyllene Alcohol	FUQAYSQLAOJBBC-UHFFFAOYSA-N	C15H26O	33.7311	pos	3.81486e+06	1.64039e+07	2.09037e+07	2.05242e+07
anomalone B|methyl 8-((1S,5S)-5-((S,E)-2-hydroxypent-3-enyl)-4-oxocyclopent-2-enyl)octanoate	IXFHTAICVWTTRD-UHFFFAOYSA-N	C19H30O4	0.513698	pos	60870.4	239806	1.61131e+07	2.05207e+07
(10E,14Z)-9-oxooctadeca-10,14-dien-12-ynoic acid	SNUNXDVKYBQMPJ-UHFFFAOYSA-N	C18H26O3	0.965263	pos	1.20577e+07	433065	1.69182e+07	2.04983e+07
ADIPATE	WNLRTRBMVRJNCN-UHFFFAOYSA-N	C6H10O4	0.183363	neg	1.0526e+07	1.75495e+07	1.06397e+07	2.04924e+07
(E)-aglawone	FZLHJBYSYBKMAV-UHFFFAOYSA-N	C21H32O2	1.08752	pos	104065	2.85125e+07	2.79438e+07	2.03884e+07
soyasapogenol E 3-O-alpha-L-rhamnopyranosyl(1->2)-beta-D-glucopyranosyl(1->4)-beta-D-glucuronopyranoside	NBDOIQTUOGNTJA-UHFFFAOYSA-N	C48H76O18	2.77838	neg	9.27727e+06	0	9.59329e+06	2.03753e+07
2-methyl-3-[(2S,3R,4S,5S,6R)-3,4,5-trihydroxy-6-(hydroxymethyl)oxan-2-yl]oxypyran-4-one	YGSIRXHFAUFUEJ-GPTQDWHKSA-N	C12H16O8	0.961312	pos	7.22946e+06	1.59812e+06	1.84659e+08	2.02528e+07
tricalysioside H 19-O-beta-D-glucopyranosyl ester|tricalysioside Z	WFMUUUXXUIVMAH-UHFFFAOYSA-N	C32H52O15	0.860017	pos	2.19191e+07	1.1289e+06	6.07697e+06	2.02172e+07
2,4-dihydroxyheptadec-16-enyl acetate	NLBYRERHXBTBBR-UHFFFAOYSA-N	C19H36O4	1.45439	pos	23244.3	159871	8.22578e+06	2.02122e+07
16R-hydroxy-20-hexa-nor-cycloartenone	AJTJMWNUICROTB-UHFFFAOYSA-N	C24H36O3	0.193992	pos	0	2.63994e+07	1.58411e+07	2.02049e+07
Astaxanthin	MQZIGYBFDRPAKN-UWFIBFSHSA-N	C40H52O4	1.49793	pos	0	8.82474e+07	3.67417e+07	2.01894e+07
1-(2,4-dihydroxyphenyl)-3-(4-methoxyphenyl)prop-2-en-1-one	ADRQFDIWPRFKSP-UHFFFAOYSA-N	C16H14O4	1.68613	neg	1.62016e+07	14897.8	1.59064e+07	2.01653e+07
epipachysamine B	LMILOBNADVQQTH-UHFFFAOYSA-N	C29H45N3O	1.1809	pos	0	0	9.44085e+06	2.01228e+07
Trilobatin	GSTCPEBQYSOEHV-QNDFHXLGSA-N	C21H24O10	1.01061	pos	8.77529e+06	0	2.09074e+07	2.01183e+07
MCULE-7689957843	ZAUMFTVHLHASMN-UHFFFAOYSA-N	C16H24O5	2.1212	pos	818331	309613	1.65391e+07	2.01165e+07
Linoelaidic acid	OYHQOLUKZRVURQ-AVQMFFATSA-N	C18H32O2	0.195555	neg	11131.6	3.31885e+07	2.8622e+07	2.0053e+07
(8E,12Z)-10,11-dihydroxyoctadeca-8,12-dienoic acid	GJGSSMGEAZMVTN-UHFFFAOYSA-N	C18H32O4	0.295562	pos	4.5692e+06	2.02548e+06	6.04049e+06	2.00178e+07
Chagreslactone	HDDNZVWBRRAOGK-UHFFFAOYSA-N	C25H36O8	1.16224	pos	9.05524e+06	21811	7.60774e+06	1.99972e+07
Cladosporide D	MVGVXWVKGZLRRK-UHFFFAOYSA-N	C25H38O3	1.52641	pos	0	1.32619e+07	2.41022e+07	1.99683e+07
Calanolide	NIDRYBLTWYFCFV-UHFFFAOYSA-N	C22H26O5	1.60557	neg	609251	1.62796e+07	8.40104e+06	1.99678e+07
ISOQUINOLINE	AWJUIBRHMBBTKR-UHFFFAOYSA-N	C9H7N	1.34144	pos	0	9.26556e+06	2.05165e+07	1.98933e+07
Candidalactone	NTAKAWMWMVZWTA-UHFFFAOYSA-N	C20H28O4	0.476146	neg	4.9057e+06	341019	1.00678e+07	1.98435e+07
Farrerol	DYHOLQACRGJEHX-UHFFFAOYSA-N	C17H16O5	0.601489	pos	4.20624e+06	157624	5.57601e+06	1.98342e+07
gamma-mangostin	VEZXFTKZUMARDU-UHFFFAOYSA-N	C23H24O6	0.0025729	pos	1.28281e+07	2.45948e+06	6.59491e+06	1.97735e+07
1-Oxo-8alpha-hydroxy-2alpha,5alpha-peroxyeudesm-3-en-11betaH-12,6alpha-olide	RWQGBQMJEDNLOJ-UHFFFAOYSA-N	C15H18O6	12.8835	pos	1.30642e+07	705444	5.74359e+07	1.96238e+07
tinosponone	RKUPDDZLTBYXDN-UHFFFAOYSA-N	C19H22O5	0.138226	pos	3.78601e+06	167940	7.00949e+06	1.95879e+07
docosylferulate	USNYNNITUQSEEV-UHFFFAOYSA-N	C32H54O4	1.12549	neg	0	5.9126e+06	2.26118e+06	1.94817e+07
3-hydroxy-9,10-dioxo-anthracene-2-carbaldehyde	OIQHIFSGCMLQQJ-UHFFFAOYSA-N	C15H8O4	1.45875	pos	1.02543e+07	0	9.34003e+06	1.94675e+07
Amphibin I	WZFBAZHBMOAWPY-UHFFFAOYSA-N	C21H34N4O4	1.68394	neg	39357.3	387651	2.41257e+06	1.94574e+07
{(Z)-3-(chloromethylene)-2,3-dihydrobenzo[b]oxepin-7-yl}methyl palmitoleate	CNHXBDOGHGXADW-UHFFFAOYSA-N	C28H39ClO3	0.2199	pos	4.44928e+07	407867	9.0283e+06	1.93707e+07
3-(3,4-dihydroxyphenyl)-2-[(E)-3-[2-(3,4-dihydroxyphenyl)-7-hydroxy-3-methoxycarbonyl-2,3-dihydro-1-benzofuran-4-yl]prop-2-enoyl]oxypropanoic acid	NFOCYHUCMXEHDG-WEVVVXLNSA-N	C28H24O12	3.04305	pos	4.43378e+06	63452.6	1.55455e+07	1.93629e+07
Typharin	CIRUTPJYXFRYFS-UHFFFAOYSA-N	C17H14O3	0.962617	neg	8.06252e+06	74972	7.06397e+06	1.93082e+07
Benzeneacetaldehyde, .alpha.-(2-phenylethylidene)-	AXZDPAXJQHIRTE-UHFFFAOYSA-N	C16H14O	0.704074	neg	7.95724e+06	277707	7.00301e+06	1.9308e+07
(-)-(2R,3S)-7,8-(2'',2''-dimethylpyrano)-3,4'-dihydroxy-5-methoxyflavan|3,4,9,10-Tetrahydro-2-(4-hydroxyphenyl)-5-methoxy-8,8-dimethyl-2H,8H-benzo[1,2-b:3,4-b']dipyran-3-ol,	SCBLRKVGVKFQKS-UHFFFAOYSA-N	C21H24O5	0.129444	neg	268864	1.32592e+06	1.37925e+06	1.92722e+07
Hydroxytanshinone	UPCWCCRFMPIOAP-UHFFFAOYSA-N	C19H18O4	2.98068	pos	8.63442e+06	0	9.11931e+06	1.92157e+07
Cycloposine	OSOOWXRUSUHLOX-PBFVMIKGSA-N	C33H51NO7	3.21363	pos	0	2.69519e+07	3.25354e+07	1.91661e+07
[7]-Paradol	CNKCFVAEACZBPL-UHFFFAOYSA-N	C18H28O3	0.982209	pos	177764	543002	4.72416e+06	1.91414e+07
Segetalin B	VBQDUSUKSGAFMN-OACKDKIBSA-N	C24H32N6O5	0.0549574	neg	8.9194e+06	65088.4	7.3925e+06	1.90645e+07
15',16'-Dihydro-3-(15-Hexadecynylidene)dihydro-4-hydroxy-5-methyl-2(3H)-furanone|isoduhydromahubenolide A	SKYACYVVYMWRPR-UHFFFAOYSA-N	C21H36O3	0.00297646	pos	286432	1.757e+07	4.85269e+07	1.90243e+07
8-Methoxyeriodictyol	DQVNDBVGXKWWNS-UHFFFAOYSA-N	C16H14O7	0.606069	pos	9.93047e+06	50166	1.05406e+07	1.90162e+07
gamahonolide B	JHWYWQUBJFEZIU-UHFFFAOYSA-N	C18H28O6	0.629733	neg	5.04029e+06	123008	5.55821e+06	1.89699e+07
Isopentyl beta-D-glucoside	PPOCTRFLRHRTTR-UHFFFAOYSA-N	C11H22O6	2.4714	pos	997931	252203	1.14738e+07	1.89669e+07
5-ethylcyclopentene-1-carbaldehyde	BXRHTYIYAZHIHF-UHFFFAOYSA-N	C8H12O	1.01416	pos	6.1841e+06	444390	7.2663e+06	1.89356e+07
7-hydroxy-1,4a-dimethyl-9-oxo-7-propan-2-yl-2,3,4,4b,5,6,10,10a-octahydrophenanthrene-1-carboxylic acid	UFEHYRPBLFGEJW-UHFFFAOYSA-N	C20H30O4	0.570954	pos	6.37808e+06	1.44015e+06	5.0116e+06	1.89159e+07
tricalysione A	SDJMNNDDHQWWJH-UHFFFAOYSA-N	C18H26O3	1.13155	pos	3.62176e+06	741693	1.03105e+07	1.8881e+07
Pauciflorol F	BADTYSQKXNDGFG-UHFFFAOYSA-N	C21H16O6	0.432583	pos	1.07258e+07	330336	8.96534e+06	1.88773e+07
3-O-acetylaleuritolic acid	BCSLIHBDUIHHTK-UHFFFAOYSA-N	C18H34O7	0.00937019	neg	2.52551e+07	455591	7.80941e+06	1.87642e+07
octa-1,3,6-triene	PKHBEGZTQNOZLP-UHFFFAOYSA-N	C8H12	0.441355	pos	1.80829e+07	2.41038e+07	2.45482e+07	1.8738e+07
3-hydroxyheteroendrin|Nitrile,2-O-beta-D-glucopyranoside-(R)-2,3-Dihydroxy-3-methylbutanoic acid	LBMQUNIFJVEIBB-UHFFFAOYSA-N	C11H19NO7	0.0277296	pos	1.77675e+07	587911	1.0648e+07	1.87286e+07
pierisformoside H	LSJFIQFWIKSQTM-UHFFFAOYSA-N	C26H42O10	0.837951	pos	2.31744e+06	277137	9.04383e+06	1.87066e+07
Palmitoylethanolamide	HXYVTAGFYLMHSO-UHFFFAOYSA-N	C18H37NO2	2.4173	pos	378987	1.88878e+07	2.23287e+07	1.86967e+07
methyl 9-methylene-8-oxoheptadecanoate	OPCAYVVIAWSNMJ-UHFFFAOYSA-N	C19H34O3	0.143846	pos	17162.7	4.00251e+06	3.14753e+07	1.86892e+07
1H-Benzotriazole	QRUDEWIWKLJBPS-UHFFFAOYSA-N	C6H5N3	2.27963	neg	5.277e+06	7.51061e+06	2.50543e+07	1.86837e+07
(-)-2,3,4-Trimethoxy-8,9-methylenedioxypterocarpan	WKTSZGRTOFXXAS-UHFFFAOYSA-N	C19H18O7	2.1504	neg	2.21996e+06	1.04709e+07	1.08853e+07	1.85366e+07
Trachyphyllin	NZJOMNMCRDSZDS-UHFFFAOYSA-N	C19H20O4	1.60029	pos	1.3666e+07	29790.7	5.97103e+06	1.84557e+07
Astragaloside III	FVFSMBDVZVUETN-BQAOMNQWSA-N	C41H68O14	0.102068	neg	1.1114e+07	0	4.47392e+06	1.84103e+07
8??-Ethoxy atractylenolide III	IKNWKYVCOWHPTC-UHFFFAOYSA-N	C18H26O3	0.927537	pos	1.11015e+07	533466	8.02477e+06	1.83624e+07
16-demethoxymethyllycaconitine|1alpha,6beta,14alpha-trimethoxy-7,8-dihydroxy-18-(2''-methyl)succinylanthranoyloxyaconane	NYZNHVPTUJDTPC-UHFFFAOYSA-N	C36H48N2O9	1.76362	neg	2.33322e+07	227089	2.56365e+06	1.81595e+07
Anthrakunthone	ZXMFLWCLJYELEM-UHFFFAOYSA-N	C19H16O4	0.982717	pos	7.82468e+06	50451.7	8.60183e+06	1.81434e+07
Syringic acid	JMSVCTWVEWCHDZ-UHFFFAOYSA-N	C9H10O5	0.161804	pos	1.00991e+07	596749	1.16926e+07	1.8122e+07
CHEMBL2147415	CLYYUOMSXIPPJS-UHFFFAOYSA-N	C18H18O4	1.07476	neg	6.4547e+06	0	8.19671e+06	1.81214e+07
fraxin	CRSFLLTWRCYNNX-QBNNUVSCSA-N	C16H18O10	1.50891	pos	1.21244e+07	0	4.10212e+06	1.8051e+07
Cleroindicin D	DDRIMXADTYBMJR-UHFFFAOYSA-N	C8H12O4	1.12464	neg	3.98169e+06	6.67778e+06	5.03829e+06	1.80487e+07
(E)-9-etheno-lasiodiplodin	YAWRBFVZUNLSKO-UHFFFAOYSA-N	C17H22O4	1.00533	pos	1.17898e+07	2.76335e+06	7.93969e+06	1.80222e+07
Marine-derived tocopherol	QAOOAZRWKHFUHK-UHFFFAOYSA-N	C29H48O2	1.11326	pos	0	237616	6.85267e+06	1.80154e+07
7-O-Methyl-ganoderic acid O	GXKWNYCHKLAQPO-UHFFFAOYSA-N	C37H56O9	0.472021	pos	1.56202e+07	197167	1.50133e+07	1.80001e+07
Solsodomine B	LISUGPHHMMHOHJ-UHFFFAOYSA-N	C8H13N3O	1.42944	pos	8.31724e+06	238728	8.56004e+06	1.79974e+07
agrocybyne A|octa-2,4-diynamide	NOLVHUDYFSBRFF-UHFFFAOYSA-N	C8H9NO	4.30386	pos	4.03914e+07	1.36056e+07	1.67155e+07	1.7944e+07
Indole-3-propionic acid	GOLXRNDWAUTYKT-UHFFFAOYSA-N	C11H11NO2	0.402081	pos	43309.6	2.08899e+07	1.61101e+07	1.79248e+07
monocycloalternarene C	XWHPUGPMFIXLGT-UHFFFAOYSA-N	C22H34O6	1.94272	pos	149873	552185	2.58796e+07	1.79009e+07
epimethyltrineracetal	QJWMWEZKMZTCAP-UHFFFAOYSA-N	C21H36O3	3.02733	pos	122827	2.60586e+07	2.23414e+07	1.78998e+07
Xylaric acid	OIYFAQRHWMVENL-UHFFFAOYSA-N	C7H6O4	3.04454	neg	1.45287e+07	2.34494e+06	1.52123e+07	1.78957e+07
methyl ent-2,4-seco-4-oxo-3,19-dinorbeyer-15-en-2-oate	YTPMQRDFWPIPIO-UHFFFAOYSA-N	C19H28O3	0.451014	pos	59331.3	219776	8.16473e+06	1.78597e+07
Palmitic acid	IPCSVZSSVZVIGE-UHFFFAOYSA-N	C16H32O2	1.16933	neg	198697	3.29506e+06	2.76217e+06	1.78585e+07
6,7-dihydroxy-3,4-dihydro-2H-isoquinolin-1-one	CSYZCWLVFOWQRK-UHFFFAOYSA-N	C9H9NO3	1.37413	neg	1.72959e+07	2.83666e+07	1.96197e+07	1.78254e+07
N-Salicyloylaspartic acid	JMJWCANHASMNST-UHFFFAOYSA-N	C11H11NO6	1.68706	neg	9.89164e+06	0	9.034e+06	1.77861e+07
(3Z,4R,5R)-4,5-dihydro-4-hydroxy-5-methoxy-5-methyl-3-octadecylidenefuran-2(3H)-one|machicolide B	IYVZSZAMCRNRDJ-UHFFFAOYSA-N	C24H44O4	2.01578	pos	0	9.31809e+06	5.90852e+06	1.77303e+07
19-Acetoxyatisirene	FSQSMHGNZBLTSR-UHFFFAOYSA-N	C22H34O2	0.476853	pos	104125	2.87645e+07	1.30011e+07	1.77184e+07
Diginin	WOLJVUSLKTUJMB-UHFFFAOYSA-N	C28H40O7	2.23703	neg	9.18239e+06	27333.4	7.53806e+06	1.77134e+07
DL-ALPHA-TOCOPHEROL	GVJHHUAWPYXKBD-UHFFFAOYSA-N	C29H50O2	2.29699	pos	0	8.82995e+06	3.33768e+06	1.76403e+07
(-)-3-O-Acetylspectaline	LRKWDKCSHJWJST-UHFFFAOYSA-N	C22H41NO3	1.60293	pos	183319	1.63073e+06	1.05071e+07	1.76327e+07
methyl lucidenate L	NGQBPTCJUKNWJC-UHFFFAOYSA-N	C28H40O7	0.666985	pos	1.13083e+07	236128	6.76657e+06	1.75755e+07
3-alpha-Hydroxy-7-oxo-5-beta-cholan-24-oic acid	DXOCDBGWDZAYRQ-UHFFFAOYSA-N	C24H38O4	0.0753235	pos	58841.3	2.69721e+07	1.61017e+07	1.74728e+07
6-Methylgingediol|methyl [6]-gingerdiol	HDNGHNOEMOMCKM-UHFFFAOYSA-N	C18H30O4	1.21153	pos	1.73754e+07	162558	4.40922e+06	1.7432e+07
MCULE-4814254518	MAQMWSUGBCIGLJ-UHFFFAOYSA-N	C15H24O6	1.39706	pos	9.55094e+06	16833.8	6.28049e+06	1.7423e+07
6'-vanilloylpediglucoside	BBUADAPAOUAEGC-UHFFFAOYSA-N	C26H30O12	1.63676	neg	1.03062e+07	0	7.57199e+06	1.73887e+07
Musk ketone	WXCMHFPAUCOJIG-UHFFFAOYSA-N	C14H18N2O5	0.057819	pos	2.97006e+06	13874.6	7.58665e+06	1.73541e+07
Soyasaponin I	PTDAHAWQAGSZDD-IOVCITQVSA-N	C48H78O18	0.460879	pos	9.99727e+06	174607	7.71339e+06	1.73006e+07
Glucosylisomaltol	RRYYNIJTMYUJDC-UHFFFAOYSA-N	C12H16O8	0.100695	pos	3.25511e+07	8.19962e+06	9.39219e+07	1.72956e+07
Kushenol A	OGBMVWVBHWHRGD-MWTRTKDXSA-N	C25H28O5	0.370856	neg	0	5.57956e+06	2.29236e+06	1.726e+07
Antibiotic SB 202742	MBYMHCHZLAJVRK-YSFKBSJESA-N	C24H34O3	0.67254	pos	0	1.12068e+07	1.31073e+07	1.71766e+07
(3S,7E,9R)-4,7-Megastigmadiene-3,9-diol 9-[apiosyl-(1->6)-glucoside]	NQBMFFMRSAECDY-UHFFFAOYSA-N	C24H40O11	1.81261	neg	7.15597e+06	15343	3.42479e+06	1.71692e+07
Jioglutin E	YBCFURRNWBFVNX-UHFFFAOYSA-N	C11H20O5	1.35435	neg	1.49956e+07	149891	9.26585e+06	1.71608e+07
Millettosin	UMORYJJPSIXKBM-UHFFFAOYSA-N	C22H18O7	2.47605	neg	9.37269e+06	0	8.57471e+06	1.71411e+07
14-hydroxy-13-methoxy-8,11,13-podocarpatrien-7-one	QTGLOJUXJHYWNY-UHFFFAOYSA-N	C18H24O3	1.54704	pos	7.31691e+06	0	6.59588e+06	1.71219e+07
ACon1_001857	NTSQICOYYNAVPJ-UHFFFAOYSA-N	C42H72O16	2.68677	neg	9.38122e+06	0	7.62644e+06	1.71202e+07
Cholylglycine	RFDAIACWWDREDC-UHFFFAOYSA-N	C26H43NO6	0.267371	neg	0	5.02952e+07	2.92813e+07	1.71169e+07
(+-)-8-Hydroxy-octadec-11t-en-9-insaeure|(+-)-8-hydroxy-octadec-11t-en-9-ynoic acid|(S?)-8-Hydroxy-octadec-11t-en-9-insaeure|(S?)-8-hydroxy-octadec-11t-en-9-ynoic acid|8-Hydroxy-octadecen-(trans-11)-in-(9)-saeure|8-hydroxy-trans-11-octadecen-9-ynoic acid	OTAWOAZBNLPFQR-UHFFFAOYSA-N	C18H30O3	1.80558	pos	9.21718e+06	1.68538e+06	6.61233e+06	1.71085e+07
limbatolide G	OOWMQASGDGGERT-UHFFFAOYSA-N	C20H26O5	3.54093	pos	3.47712e+06	427688	7.08835e+06	1.70996e+07
Dehydrotrametenolic acid	QFPLAAZRZNKRRY-GIICLEHTSA-N	C30H46O3	0.396338	pos	8.92144e+06	0	7.41939e+06	1.70794e+07
4-acetyloxy-3-methylbut-2-enoic acid	CHRAOTZDMAXDKI-UHFFFAOYSA-N	C7H10O4	0.765175	neg	7.79194e+06	2.86835e+07	9.89406e+06	1.70612e+07
(3beta,5alpha,6beta,24R)-Stigmastane-3,5,6-triol	VGSSUFQMXBFFTM-UHFFFAOYSA-N	C29H52O3	2.8707	neg	0	1.43467e+07	7.93141e+06	1.69898e+07
Morusimic acid F	OPRYWCSVGFCHJA-UHFFFAOYSA-N	C18H35NO4	0.504884	pos	1.60713e+07	0	5.42781e+06	1.69697e+07
Tulipinolide	UPNVKIZABMRHNR-BZLPTDEHSA-N	C17H22O4	1.5089	pos	6.82355e+06	117446	6.80327e+06	1.692e+07
hirsutanone	VWHYFMQKJYFLCC-DUXPYHPUSA-N	C19H20O5	0.555877	pos	328462	0	1.29886e+07	1.68674e+07
<alpha-L-rhamnopyranosyl(1->4)-beta-D-glucopyranosyl(1->)3>-3,23beta-di-hydroxy-olean-12-en-28-oic acid|[alpha-L-rhamnopyranosyl(1->4)-beta-D-glucopyranosyl(1->)3]-3,23beta-di-hydroxy-olean-12-en-28-oic acid	STXDSCYYKKEUSA-UHFFFAOYSA-N	C43H72O13	1.32038	pos	0	1.44544e+07	1.69278e+07	1.68419e+07
Rotundial	KBJJMMFFLYXMPU-UHFFFAOYSA-N	C9H12O2	1.18023	pos	1.18284e+06	1.15614e+06	9.80132e+06	1.68404e+07
Buntansin A	GQYZDAIERJIQDI-UHFFFAOYSA-N	C11H8O5	0.870776	pos	1.0592e+07	0	9.32376e+06	1.68383e+07
3-Indolebutyric acid	JTEDVYBZBROSJT-UHFFFAOYSA-N	C12H13NO2	1.924	pos	627521	8.22763e+06	1.88549e+07	1.67828e+07
gamma-L-Glutamyl-L-phenylalanine	XHHOHZPNYFQJKL-QWRGUYRKSA-N	C14H18N2O5	0.851034	pos	1.30896e+07	3.14383e+06	6.81074e+06	1.66676e+07
Di-Me ester-ent-14,15,16-Trionor-3-clerdene-13,18-dioic acid|nor-hardwickiic acid methyl ester	XGDOSKGZFFRFTH-UHFFFAOYSA-N	C19H30O4	0.91425	pos	325655	1.80287e+06	1.13556e+07	1.66277e+07
8-Acetylexcelsine	ILGAPGCSXYBIJK-UHFFFAOYSA-N	C24H35NO7	0.461694	pos	0	35333	6.25917e+06	1.66247e+07
2-(1-Methylethylidene)pentanedioic acid	FMLQKYAZHSLEKX-UHFFFAOYSA-N	C8H12O4	1.28796	neg	6.23148e+06	6.26585e+06	1.03631e+07	1.65855e+07
R-2-Hydroxy-3-methylbutanoic acid 3-Methylbutanoyl	SOJFCTIYHPWXGZ-UHFFFAOYSA-N	C10H18O4	3.5689	pos	165905	0	4.12319e+06	1.65201e+07
Glycyrrhisoflavone	JOQWUUJQWPZLAT-UHFFFAOYSA-N	C20H18O6	2.30818	neg	9.9611e+06	10258.6	1.19948e+07	1.64787e+07
mirabilol A	MGWFFACWUBVZPP-UHFFFAOYSA-N	C42H34O10	2.90273	pos	8.22735e+06	1.46134e+06	3.64734e+06	1.64692e+07
m-cresol	RLSSMJSEOOYNOY-UHFFFAOYSA-N	C7H8O	3.8986	neg	214323	2.80335e+06	1.85071e+06	1.64111e+07
16-hydroxy-9-oxooctadeca-10,12,14-trienoic acid	KLFMLBSZQZVKDC-UHFFFAOYSA-N	C18H28O4	1.06259	neg	110385	5.1409e+06	6.31115e+06	1.63665e+07
Eucommioside II|Eucommioside-II	MFWQCQUSLBCVIU-UHFFFAOYSA-N	C15H26O9	0.481382	neg	1.3306e+06	215361	1.22563e+07	1.6349e+07
(9S,10E,12Z,15Z)-9-Hydroxy-10,12,15-octadecatrienoic acid	RIGGEAZDTKMXSI-JPAZTHTMSA-N	C18H30O3	1.41787	pos	165680	6.6897e+06	1.66294e+07	1.63427e+07
4',3''-di-O-methylapocynin-D	HYDZYHSPOSOKQM-UHFFFAOYSA-N	C26H24O10	8.02337	neg	1.05962e+07	1.00719e+06	1.09652e+07	1.63256e+07
Monilidiol	GSJOHGKWUQYYGJ-UHFFFAOYSA-N	C16H21ClO4	1.80917	pos	1.22672e+06	1.03671e+06	7.4639e+07	1.63194e+07
(-)-12-hydroxyjasmonic acid	RZGFUGXQKMEMOO-UHFFFAOYSA-N	C12H18O4	1.70768	pos	1.44994e+07	112313	6.11664e+06	1.62488e+07
Hebevinoside VI	MPXQWAXHGMPSTR-UHFFFAOYSA-N	C41H68O12	0.572609	pos	0	1.41767e+07	1.3723e+07	1.62453e+07
cyclo-(Pro1-Ile-Tyr-Asp-Pro2-Phe2-Pro3-Phe1)|japonicin B	FIXWXXJYESHAJF-UHFFFAOYSA-N	C52H64N8O11	2.45407	pos	1.9677e+07	0	1.05204e+07	1.62091e+07
Kamalachalcone A	RPVZMUGANNMZGT-UHFFFAOYSA-N	C42H40O8	0.71821	neg	0	1.54465e+06	2.03514e+07	1.6179e+07
solidagosaponin IX	JXTJUYPVXICIKO-UHFFFAOYSA-N	C42H68O16	1.87125	neg	9.01664e+06	0	6.43336e+06	1.61686e+07
Physciondiglucoside	LHWONDXFTUKXDH-UHFFFAOYSA-N	C28H32O15	0.961236	pos	3.38687e+06	0	9.33365e+06	1.61561e+07
Maltoxazine	MTHASAHNRVFFOM-UHFFFAOYSA-N	C10H13NO2	2.01103	pos	1.48506e+07	753175	7.56872e+06	1.6155e+07
Bakuchicin	HMUJHZNYHJMOHR-UHFFFAOYSA-N	C11H6O3	3.01642	neg	8.13676e+06	0	1.07664e+07	1.61549e+07
Linderalactone	LWCKQMHMTSRRAA-CYBMUJFWSA-N	C15H16O3	1.15487	pos	6.39442e+06	99303.5	8.8115e+06	1.61118e+07
Tyr-Ile-Glu-Asn-Gln-Val-Lys	YYNGYAXOWMFESR-UHFFFAOYSA-N	C40H64N10O13	0.32628	pos	1.55739e+07	0	9.42272e+06	1.60841e+07
Randainol	OUJJWPMPNAGHRR-UHFFFAOYSA-N	C18H18O3	0.0500375	pos	6.11027e+06	0	7.17265e+06	1.60746e+07
3,4-Dihydroxy-5-(2,3,4-trihydroxyphenoxy)benzoic acid	RCFLHUOOZRSCPO-UHFFFAOYSA-N	C13H10O8	1.91881	neg	4.8989e+06	0	8.86832e+06	1.60672e+07
Virensic acid	FOKAHYDSEWGOHN-UHFFFAOYSA-N	C18H14O8	2.60354	neg	1.26613e+07	2.66561e+06	7.17861e+06	1.60355e+07
Hypoxylone	DWPXLJQPGHLLCH-UHFFFAOYSA-N	C20H12O5	3.0463	pos	2.95105e+06	0	2.4107e+07	1.59942e+07
RUGULOSIN	QFDPVUTXKUGISP-UHFFFAOYSA-N	C30H22O10	1.01871	pos	1.29497e+08	0	8.58306e+06	1.59447e+07
2-Hydroxy-cis-9,cis-12,cis-15-octadecatriensaeuremethylester|alpha-Hydroxylinolensaeuremethylester|methyl alpha-hydroxy linolenate	DYFXKQIZAHPOSD-UHFFFAOYSA-N	C19H32O3	1.42848	pos	47596.8	373147	1.55002e+07	1.59438e+07
Byssomeruliol G	AUIAPTZZCKLELT-UHFFFAOYSA-N	C30H50O11	2.73164	neg	8.86624e+06	0	8.59559e+06	1.59355e+07
Indole-3-carboxylic acid; CE0; KMAKOBLIOCQGJP-UHFFFAOYSA-N	KMAKOBLIOCQGJP-UHFFFAOYSA-N	C9H7NO2	2.00402	pos	9.78967e+06	1.22396e+07	1.04725e+07	1.59053e+07
Stearidonic acid	JIWBIWFOSCKQMA-LTKCOYKYSA-N	C18H28O2	0.22736	pos	1.27727e+07	126413	1.28819e+07	1.59027e+07
16beta-Hydroxycardiopetaline	UMENVHXIPMXIRD-UHFFFAOYSA-N	C21H33NO4	1.39094	neg	58151.1	2.07608e+07	1.48979e+07	1.5844e+07
alpha-Linolenic acid	DTOSIQBPPRVQHS-PDBXOOCHSA-N	C18H30O2	1.69959	pos	347023	1.01053e+07	1.231e+07	1.58298e+07
Zeanic acid	DVEVPRIOUKVFAM-UHFFFAOYSA-N	C10H7NO4	2.73175	pos	8.86749e+06	1.40787e+06	7.69319e+06	1.5821e+07
(22S,25S)-17alpha,26-dihydroxy-22,25-epoxyfurost-4-en-3-one|diosbulbisin C	MJWCLSBMPLOHJT-UHFFFAOYSA-N	C27H40O5	0.504334	pos	1.05465e+07	40144.6	5.87834e+06	1.58185e+07
Alisol A	HNOSJVWYGXOFRP-UNPOXIGHSA-N	C30H50O5	1.76253	pos	2.31157e+06	18707.4	9.40772e+07	1.5808e+07
Scortechinone H	LLUOWYAXWXVGKY-UHFFFAOYSA-N	C34H40O8	0.538441	pos	0	8.16523e+06	1.80824e+07	1.57592e+07
Arachidonic Acid (peroxide free)	YZXBAPSDXZZRGB-DOFZRALJSA-N	C20H32O2	1.53391	neg	10243.5	2.79317e+07	1.40331e+07	1.57478e+07
5,6-cis-5'-epi-puliscabrin	QNWUKAPRXIAXCS-UHFFFAOYSA-N	C30H44O2	0.33639	pos	7.84763e+06	790696	4.48882e+06	1.56964e+07
4-Methylcyclohex-3-enecarbaldehyde	YPHGCKOZJCGDTF-UHFFFAOYSA-N	C8H12O	1.22015	pos	4.29435e+06	159491	6.79182e+06	1.56803e+07
Antibiotic ML-236C	NXIASLUNMKAUTN-UHFFFAOYSA-N	C18H26O3	1.098	pos	1.46163e+06	165273	9.09586e+06	1.56424e+07
aspewentin C	MMWGIGCGTHYFEV-UHFFFAOYSA-N	C19H26O2	1.63785	pos	1.04455e+07	0	6.1269e+06	1.5627e+07
boydone A	JDAOAPPGBLJFBL-UHFFFAOYSA-N	C17H27NO4	0.305187	pos	1.45556e+06	6.02997e+06	3.38692e+06	1.55752e+07
4-NITROPHENOL	BTJIUGUIPKRLHP-UHFFFAOYSA-N	C6H5NO3	58.0315	neg	9.77407e+06	1.13917e+06	8.82459e+06	1.55401e+07
Palmidin A	DJTVMANCSQLMCX-UHFFFAOYSA-N	C30H22O8	1.40802	pos	0	36923.3	7.82943e+06	1.54918e+07
7beta-(beta-glucopyranosyloxy)-3beta-hydroxycucurbita-5,23,25-trien-19-al|kuguaglycoside C	OMBHCPPEZFBPJG-UHFFFAOYSA-N	C36H56O8	1.71978	pos	8e+06	68993.3	1.10514e+07	1.54881e+07
3-oxo-5alpha-lanosta-8,24-dien-21-oic acid ester beta-D-glucoside|ganosinoside A	FDBJWQHOGLAJOW-UHFFFAOYSA-N	C36H56O8	1.17044	pos	1.15498e+07	0	7.98467e+06	1.5458e+07
cyclo-[DHMHDA-L-Ser-D-Ala-D-Asp-L-Ala-D-Ser-D-Ser-D-allo-Thr]|phaeofungin	WKSAMKWFSYJCOB-UHFFFAOYSA-N	C40H69N7O16	2.79412	neg	0	1.32685e+07	6.74624e+06	1.5448e+07
1-deoxy-2-demethyl-viridiol	OMFRFNKENPVEGO-UHFFFAOYSA-N	C19H16O5	0.337561	pos	3.98043e+06	0	4.8976e+06	1.5407e+07
4-GUANIDINOBUTANOIC ACID	TUHVEAJXIMEOSA-UHFFFAOYSA-N	C5H11N3O2	1.35073	pos	6.88065e+06	1.7211e+07	3.65817e+07	1.53944e+07
BETAINE	KWIUHFFTVRNATP-UHFFFAOYSA-N	C5H11NO2	1.18001	pos	1.41635e+07	1.97415e+07	1.72383e+07	1.53901e+07
Chaksine	CGGAHJGHSHWGLE-UHFFFAOYSA-N	C22H38N6O4	1.01945	pos	0	7.42331e+06	1.56691e+06	1.53535e+07
Bis[6-(3,4,7-trihydroxy-3,7-dimethyloctenyl)] ether	RZOLATFOMQUCOR-UHFFFAOYSA-N	C20H38O7	0.170723	neg	4323.27	524613	5.09744e+06	1.53417e+07
DL-Thyroxine	XUIIKFGFIJCVMT-UHFFFAOYSA-N	C15H11I4NO4	1.9964	pos	0	2.39218e+07	1.85992e+07	1.53246e+07
PANTOTHENATE	GHOKWGTUZJEAQD-UHFFFAOYSA-N	C9H17NO5	0.915972	pos	1.29755e+06	1.7213e+07	1.12515e+07	1.52964e+07
8beta,18-dihydroxy-15-malonyloxy-ent-labdane	VBANHXPCXYELBF-UHFFFAOYSA-N	C23H40O6	0.472687	pos	0	6.99928e+06	6.28299e+06	1.52925e+07
makilactone A	DTNAVVKBJYWEIO-UHFFFAOYSA-N	C18H20O4	1.84167	neg	4.78787e+06	81098.7	7.6231e+06	1.5257e+07
Erucamide	UAUDZVJPLUQNMU-KTKRTIGZSA-N	C22H43NO	0.996847	pos	1.15257e+07	1.53853e+07	1.10528e+07	1.52526e+07
Moracin C	ZTGHWUWBQNCCOH-UHFFFAOYSA-N	C19H18O4	1.07981	pos	3.48287e+06	0	7.43974e+06	1.52505e+07
Coleon U	XPYRMWZAUHBOPE-UHFFFAOYSA-N	C20H26O5	0.0396228	neg	3.22729e+06	183818	7.11508e+06	1.52477e+07
10alpha,14alpha-diacetoxy-7,8-epoxydolabella-3(E),18-dien-2alpha-ol	VPIUMLVOOPBMDL-UHFFFAOYSA-N	C24H36O6	1.1589	pos	605448	1.96851e+07	1.78976e+07	1.52292e+07
(2S,3R,4S,4aR,7S,7aS,3'R,5'R,Z)-2-(3,5-dimethylhept-1-enyl)-3,4-dihydroxy-7-methyl-4,4a,7,7a-tetrahydro-2H-furo[3,4-b]pyran-5(3H)-one|fusidilactone E	AUUCDSHFBVTBJU-UHFFFAOYSA-N	C17H28O5	1.74334	pos	4.108e+06	1.52379e+07	1.16883e+07	1.52282e+07
Methyl ent-16-hydroxy-6,8(17),13E-labdatrien-15-oate	NYSANASQZRWHDH-UHFFFAOYSA-N	C21H32O3	0.0324356	pos	2.73294e+06	5.70238e+06	7.59371e+06	1.51839e+07
Hexadecyl acetate	LSTDYDRCKUBPDI-UHFFFAOYSA-N	C18H36O2	1.355	pos	3.95435e+06	1.28352e+07	1.35654e+07	1.51803e+07
Vitamin A	FPIPGXGPPPQFEQ-OVSJKPMPSA-N	C20H30O	0.943838	pos	272683	1.75992e+07	1.3487e+07	1.51704e+07
(25R)-26-O-beta-D-glucopyranosyl-22-O-methyl-5alpha-furostane-2alpha,3beta,5,6beta,22xi-pentol 2-O-beta-D-glucopyranoside	IHHVXRVETZYBSD-UHFFFAOYSA-N	C40H68O17	0.245857	neg	7.67645e+06	0	6.77629e+06	1.51619e+07
(20S,22R)-3alpha,6alpha-epoxy-4beta,5beta,27-trihydroxy-1-oxowitha-24-enolide|(20S,22R)-3??,6??-Epoxy-4??,5??,27-trihydroxy-1-oxowitha-24-enolide|3alpha,6alpha-epoxy-4beta,5beta,27-trihydroxy-1-oxowitha-24-enolid	YXNFYOIERQXPKC-UHFFFAOYSA-N	C28H40O7	0.528785	pos	8.45528e+06	0	7.29393e+06	1.51544e+07
(12RS)-(8E,10E)-12-hydroxy-7-oxo-8,10-octadecadienoic acid	UXYFUYRKYUHZOH-UHFFFAOYSA-N	C18H30O4	0.596288	pos	9.48406e+06	575346	7.19939e+06	1.50706e+07
14-isobutyryloxycacalohastin	UDAIPOGMXJGGDN-UHFFFAOYSA-N	C20H26O4	2.48063	pos	1.64965e+07	2.80929e+06	6.04536e+06	1.50353e+07
(R)-6-hydroxymellein 6-O-beta-D-[5-O-(4-methoxybenzoyl)]apiofuranosyl-(1->6)-beta-D-glucopyranoside	GSZGJTIWTWKADX-UHFFFAOYSA-N	C29H34O15	1.98926	neg	7.26752e+06	0	7.51008e+06	1.50252e+07
cyphoplectine	XHJDCLXGXWJUHK-UHFFFAOYSA-N	C32H45NO7	1.17905	neg	0	1.75453e+07	6.06849e+06	1.49885e+07
Yadanzioside F	BYBDRFPMKPUWDZ-UHFFFAOYSA-N	C29H38O16	20.9006	pos	4065.35	3.51522e+06	2.90391e+07	1.49825e+07
methyl 8-oxo-9-octadecynoate	NLEWYDKBCGSSNV-UHFFFAOYSA-N	C19H32O3	1.82562	pos	292175	707399	8.68242e+06	1.49646e+07
4-Methyl-9H-furo[2',3':7,8]naphtho[2,1-b]pyran-9-one	CMVWCZALMZPWRS-UHFFFAOYSA-N	C16H10O3	2.79196	pos	1.83897e+07	347461	1.75419e+07	1.49495e+07
1-Acetoxy-hexadeca-6t,8t,12t,14t-tetraen-10-in|all-trans-1-Acetoxy-hexadecatetraen-(6,8,12,14)-in-(10)	SYLJWESUNXCJKH-UHFFFAOYSA-N	C18H24O2	0.335998	pos	217422	543280	6.79739e+06	1.49296e+07
16alpha,25-Diacetoxy-2beta,20-dihydroxy-10alpha-cucurbita-5,23t-dien-3,11,22-trion|16alpha,25-diacetoxy-2beta,20-dihydroxy-10alpha-cucurbita-5,23t-diene-3,11,22-trione|Fabacein	VDSNEQABQQKTRF-UHFFFAOYSA-N	C34H48O9	2.69259	neg	19720.9	4.06641e+07	1.69019e+07	1.49174e+07
ent-labda-8(17),13-dien-15,16-olid-19-oic acid methyl ester	MHAKMDGRIRPMBD-UHFFFAOYSA-N	C21H30O4	1.58945	pos	26209.6	564814	1.07724e+07	1.49145e+07
Epidihydrophaseic acid	XIVFQYWMMJWUCD-UHFFFAOYSA-N	C15H22O5	0.647558	neg	1.43079e+07	0	7.62758e+06	1.49138e+07
3alpha,6beta-bis(4-methoxybenzoyloxy)tropane|merredissine	CYYVWDCOFOKRDD-UHFFFAOYSA-N	C24H27NO6	1.41273	neg	7.69509e+06	0	5.29141e+06	1.49017e+07
Mammea A/BA	SBHOAZQBEGVQLJ-UHFFFAOYSA-N	C25H26O5	0.0162353	pos	914738	8.50877e+06	8.05606e+06	1.48594e+07
2-methylbut-2-enedioic acid	HNEGQIOMVPPMNR-UHFFFAOYSA-N	C5H6O4	3.11763	neg	2.9637e+07	1.20935e+07	1.03794e+07	1.48392e+07
Cyclopenin	APLKWZASYUZSBL-UHFFFAOYSA-N	C17H14N2O3	1.06685	pos	1.30783e+06	85514.3	1.16607e+07	1.47916e+07
4-(hydroxymethyl)-3-(1-hydroxy-4-methylhexyl)oxolan-2-one	LOMGRMLVVBQVNJ-UHFFFAOYSA-N	C12H22O4	0.957911	neg	1.22907e+07	1.93389e+06	6.77279e+06	1.47492e+07
Cimiracemate D	BMUMFENOGAOBAV-UHFFFAOYSA-N	C20H20O8	1.30951	neg	115257	49033.8	1.27124e+07	1.47421e+07
Artemisinin	BLUAFEHZUWYNDE-UHFFFAOYSA-N	C15H22O5	3.32045	pos	1.35151e+06	571792	574961	1.4709e+07
11-Hydroxyjasmonic acid	KLPBEXRQJBKPDM-UHFFFAOYSA-N	C12H18O4	1.76554	neg	1.1507e+07	325411	8.11389e+06	1.47017e+07
arugosins G	SKRQPJZOWGXGMD-UHFFFAOYSA-N	C30H36O6	1.00241	neg	3712.38	5.93229e+06	2.05856e+07	1.46965e+07
(4E,8E,12Z)-13-hydroxymethylene-1-(2-hydroxyphenyl)-5,9-dimethyl-4,8,12-tetradecatrien-1-one|(4E,8E,12Z)-form-13-(Hydroxymethyl)-1-(2-hydroxyphenyl)-5,9-dimethyl-4,8,12-tetradecatrien-1-one	YZTLBKLOFZVPRV-UHFFFAOYSA-N	C23H32O3	1.0277	pos	10411.1	1.26294e+07	4.85095e+07	1.4669e+07
2-hydroxymethylbutanenitrile beta-D-glucopyranoside|supinanitriloside A	YBXDDSPUDXLZCA-UHFFFAOYSA-N	C11H19NO6	0.880163	pos	8.87136e+06	1.5125e+06	1.03214e+07	1.46536e+07
haloperidol	LNEPOXFFQSENCJ-UHFFFAOYSA-N	C21H23ClFNO2	2.317	neg	70745.8	7.55095e+06	5.66277e+06	1.46371e+07
4-Chloro-3,7-epoxy-9-chamigranone	NDZAVQHKUNPCET-UHFFFAOYSA-N	C15H23ClO2	1.32676	neg	9.56203e+06	1.26234e+07	1.701e+07	1.4594e+07
9-HODE	NPDSHTNEKLQQIJ-ZJHFMPGASA-N	C18H32O3	0.0403301	neg	90460.1	9.93579e+06	9.7056e+06	1.45386e+07
HDMBOA-Glc	UOASSFRPBORTCT-UHFFFAOYSA-N	C16H21NO10	1.00962	pos	115078	3.43717e+07	2.99491e+07	1.4509e+07
Abieta-8,11,13-trien-18-al #	YCLCHPWRGSDZKL-UHFFFAOYSA-N	C20H28O	1.59586	pos	8737.74	2.26393e+07	2.66287e+07	1.44638e+07
(+)-Sempervirine|Sempervirine+	BRGSDABMUAIXHJ-UHFFFAOYSA-N	C33H52N2O4	0.903903	pos	3.05671e+06	1.50386e+07	1.20862e+07	1.43799e+07
4-Ethoxybenzaldehyde	JRHHJNMASOIRDS-UHFFFAOYSA-N	C9H10O2	0.0582801	pos	681506	1.38453e+06	8.48719e+06	1.43753e+07
3beta-hydroxy-13-methoxy-8,12-podcarpadiene-11,14-dione|3??-Hydroxy-13-methoxy-8,12-podocarpadiene-11,14-dione	FRKQXCXTRIFGAC-UHFFFAOYSA-N	C18H24O4	2.19362	pos	3.31211e+06	1.07299e+06	6.59791e+06	1.42985e+07
(S)-3-Methylthiohexyl hexanoate	YCHLQQVZMIQEAC-UHFFFAOYSA-N	C13H26O2S	0.700559	pos	31840.4	1.98662e+07	1.91464e+07	1.42954e+07
Glycyrrhetinic Acid	MPDGHEJMBKOTSU-YKLVYJNSSA-N	C30H46O4	0.85012	pos	4.73269e+06	821678	7.70604e+06	1.42949e+07
Albopilosin J	JQJBEHOGHZETSG-UHFFFAOYSA-N	C26H42O10	2.2636	pos	3.65022e+06	74655.6	7.1409e+06	1.41845e+07
Malonic acid	OFOBLEOULBTSOW-UHFFFAOYSA-N	C3H4O4	1.75412	neg	3.15309e+07	658703	8.47937e+06	1.41687e+07
Sporovexin C	AQYVBRADYQRCEE-UHFFFAOYSA-N	C15H19NO6	1.28112	pos	3.26474e+07	0	5.40391e+06	1.41504e+07
D-Gluconic acid	RGHNJXZEOKUKBD-UHFFFAOYSA-N	C6H12O7	1.68732	neg	9.22117e+07	29338.6	7.45007e+06	1.41481e+07
Retinal	NCYCYZXNIZJOKI-OVSJKPMPSA-N	C20H28O	1.61103	pos	19896.2	3.31274e+07	2.32486e+07	1.41123e+07
Tournefolic acid B ethyl ester	WIXDFLWXLUYIGH-UHFFFAOYSA-N	C19H16O6	1.04619	pos	7.35081e+06	0	6.34273e+06	1.40944e+07
phellinic acid	KVWCRPCDFBQMJT-UHFFFAOYSA-N	C23H34O3	0.68573	pos	141150	4.76907e+06	1.5186e+07	1.40185e+07
Gyrocyanin	DIFAFZFNMSLGGN-UHFFFAOYSA-N	C17H12O5	1.76559	pos	1.1055e+07	1.67573e+07	1.44633e+07	1.4016e+07
MEGxp0_000986	XXWADLUHKWQSJW-UHFFFAOYSA-N	C36H60O11	1.51726	neg	5.78776e+06	7121.47	8.05227e+06	1.39907e+07
Multiforisin A	GWOSIAKMGPKVAC-UHFFFAOYSA-N	C11H12O5	2.12886	neg	1.34083e+07	0	8.60059e+06	1.39649e+07
Dipyridamole	IZEKFCXSFNUWAM-UHFFFAOYSA-N	C24H40N8O4	2.01289	pos	1.55381e+07	27514.9	5.8799e+06	1.39311e+07
4-ethoxy-4-oxobut-2-enoic acid	XLYMOEINVGRTEX-UHFFFAOYSA-N	C6H8O4	2.3854	pos	7.57514e+06	6.72343e+06	1.13635e+07	1.39291e+07
sebestenoid B	SEKVSOQUNDUMOA-UHFFFAOYSA-N	C27H22O10	0.194471	neg	165363	11884	8.98e+06	1.38737e+07
2-phenylethyl beta-D-glucopyranoside	MLRIJUWUQTVDQE-UHFFFAOYSA-N	C14H20O6	0.947546	pos	1.42252e+07	294455	9.42206e+06	1.38245e+07
CAFFEATE	QAIPRVGONGVQAS-RQOWECAXSA-N	C9H8O4	1.89399	pos	2.39025e+07	31448.1	3.51325e+06	1.38167e+07
2-Acetoxy-4,5-dihydroxykleinifulgin	KFQZVOVQZZCJFE-UHFFFAOYSA-N	C32H48O11	1.2244	pos	1.19258e+07	101734	7.96373e+06	1.37894e+07
2,3-Dehydro-O-(2-pyrrolylcarbonyl)virgiline	MYPCMXFVOYUANL-UHFFFAOYSA-N	C20H25N3O3	0.845969	pos	2.04699e+06	97169.1	2.79559e+06	1.3771e+07
(2S)-7-hydroxy-alpha-dunnione	QWGVFBHDQGWFGO-UHFFFAOYSA-N	C15H14O4	0.151243	neg	638360	1.84458e+06	8.36416e+06	1.37556e+07
Annosquamosin G	BPTFMXPYKVCKDB-UHFFFAOYSA-N	C19H32O4	0.515271	pos	285596	158189	7.42837e+06	1.37306e+07
DTXSID70707372	HKSDVVJONLXYKL-UHFFFAOYSA-N	C18H30O3	2.38231	pos	32551	1.69316e+06	1.1571e+07	1.3729e+07
zexbrevin	ZUSPJLQZGBITEG-UHFFFAOYSA-N	C19H22O6	1.398	neg	44046.2	3.49133e+06	7.7184e+06	1.37131e+07
2-PHENYLDODECANE	VRPRIAVYSREHAN-UHFFFAOYSA-N	C18H30	2.73842	pos	89223.1	1.4265e+07	1.47845e+07	1.37e+07
beta-Citraurinene	GKMHSJYLRXLVRG-BIIAHISDSA-N	C30H42O	1.06652	pos	7.13528e+06	21535.8	4.4473e+06	1.36661e+07
6-coumaryl protocatechuate	GDGVYVSUXPSLIZ-UHFFFAOYSA-N	C16H10O6	0.810886	neg	6.90148e+06	145701	5.77701e+06	1.362e+07
(+)-morrisonicolanin|(E)-3-[(2S,3R)-2,3-dihydro-2-(4'-hydroxyphenyl)-3-hydroxymethyl-1-benzo[b]furan-5-yl]-2-propenal	OXARWFHMBHALJA-UHFFFAOYSA-N	C18H16O4	2.91472	pos	8.66962e+06	0	6.57151e+06	1.36028e+07
Queretaroic-30-caffeat	TZZIDPAXUWZHFT-UHFFFAOYSA-N	C39H54O7	0.536689	pos	6.5612e+06	0	5.77417e+06	1.35704e+07
Octadecanedioic acid	BNJOQKFENDDGSC-UHFFFAOYSA-N	C18H34O4	0.330102	neg	66835.9	1.3917e+07	6.67535e+06	1.3516e+07
ACMC-20n5kv	BNMYUQILBYIYOG-UHFFFAOYSA-N	C18H28O3	0.914016	pos	2.27454e+06	1.11362e+06	8.13176e+06	1.34785e+07
12-Hydroxy-13-methylpodocarpa-8,11,13-trien-3-one	MBULUNFSSAYJCH-UHFFFAOYSA-N	C18H24O2	0.868101	pos	7.74582e+06	0	4.71318e+06	1.34776e+07
Sweroside	VSJGJMKGNMDJCI-ZASXJUAOSA-N	C16H22O9	2.04842	pos	8.36142e+06	3.77904e+06	1.07309e+07	1.34703e+07
Theaflavic acid	SDSXQESYQIRNNR-UHFFFAOYSA-N	C21H16O10	0.143847	pos	9.85804e+06	0	8.50957e+06	1.34558e+07
Zizyphus mucronata Alkaloid	BPPFBXBVJWRESO-UHFFFAOYSA-N	C28H42N4O5	2.48068	pos	0	2.17278e+07	4.22645e+07	1.34478e+07
Isofavelol	UBBRYIQJGCMDGN-UHFFFAOYSA-N	C19H24O3	0.383794	pos	1.12628e+07	3.96132e+06	4.33047e+06	1.34471e+07
MCULE-5385319007	JKTSDLANZJEZMK-UHFFFAOYSA-N	C18H24O4	1.83971	neg	1.42466e+06	35848.2	4.58799e+06	1.33942e+07
8-Ac,Me ester-(1beta,4alpha,6alpha,8alpha)-1,4,6,8-Tetrahydroxy-11(13)-eudesmen-12-oic acid	OPKIAWIFXOGIIZ-UHFFFAOYSA-N	C18H28O7	2.70156	pos	2.62553e+06	140552	3.82836e+06	1.33924e+07
Salignarine A	RRIHUBBCYOKLFC-UHFFFAOYSA-N	C30H48N2O5	0.299931	neg	7.51246e+06	9.91732e+06	8.19578e+06	1.33733e+07
Dihydropontevedrine	LHOGFLGQIXAPMO-UHFFFAOYSA-N	C21H21NO6	0.6891	neg	0	52082.6	2.46201e+06	1.3345e+07
Erigerenone B	NFRUZLCRXIYQPR-UHFFFAOYSA-N	C12H18O4	3.41154	pos	293935	278416	9.14408e+06	1.33231e+07
Galanganol C	JFEPBHGKNWISIN-UHFFFAOYSA-N	C27H28O5	2.37119	neg	73458.4	9.5602e+06	3.64786e+06	1.33229e+07
5-O-ethyl embelin	BKAZNQWWINLHDW-UHFFFAOYSA-N	C19H30O4	2.22517	pos	3.94609e+06	500755	5.56281e+06	1.33179e+07
Tournefolic acid A	KSKIGSUQYGWNAK-UHFFFAOYSA-N	C17H12O6	1.3166	pos	2.57656e+06	144806	8.10592e+06	1.32681e+07
Demethoxycurcumin	HJTVQHVGMGKONQ-LUZURFALSA-N	C20H18O5	1.22077	pos	4.75487e+06	0	6.58751e+06	1.3262e+07
3beta-(2-methylbutyryloxy)-8-oxo-eremophila-6,9-dien-12-oic acid	RHAVGGANRGGENU-UHFFFAOYSA-N	C19H26O5	0.567692	neg	1.5588e+06	95789	6.04219e+06	1.31724e+07
bromocyclococanol	DFPDSQVEWPQCNC-UHFFFAOYSA-N	C15H25BrO	1.48271	pos	2.41235e+06	2.36122e+06	5.18047e+06	1.31325e+07
(10E,12E)-9,14-Dioxo-10,12-octadecadienoic acid	HRYSXCQQEVMPFB-UHFFFAOYSA-N	C18H28O4	1.17087	neg	4.10365e+06	406936	4.68286e+06	1.31228e+07
Asparagine	DCXYFEDJOCDNAF-UHFFFAOYSA-N	C4H8N2O3	2.8931	pos	3.94134e+08	5.14105e+06	1.82514e+07	1.3109e+07
fibrauretin E	BIASRRRDJDMDEH-UHFFFAOYSA-N	C19H20O5	1.23702	pos	7.17554e+06	271712	5.24962e+06	1.30856e+07
Dihydromilletenone methyl ether	DTXKPYYJPVZPRP-UHFFFAOYSA-N	C19H20O6	0.193539	pos	4.40858e+06	0	5.03247e+06	1.30854e+07
Spinosin	VGGSULWDCMWZPO-ODEMIOGVSA-N	C28H32O15	2.94508	neg	2.44295e+07	1.09773e+06	4.98826e+06	1.30677e+07
Ipomeanine	VUENWDJSJYJARL-UHFFFAOYSA-N	C9H10O3	1.2226	pos	2.90647e+06	0	4.25174e+06	1.30487e+07
rivulobirin A	AVODUFXCUYKMAY-UHFFFAOYSA-N	C32H28O10	2.31518	neg	1.03111e+07	0	1.18043e+07	1.30387e+07
1,5-endoperoxy-2-hydroperoxycarot-3-ene-4-carbaldehyd|1,5-epidioxy-2-hydroperoxycarot-3-en-14-al	RHLLNTAZVZVMSG-UHFFFAOYSA-N	C15H22O5	2.4335	pos	0	704177	2.1675e+07	1.2996e+07
3,4,5-Trimethoxytoluene	KCIZTNZGSBSSRM-UHFFFAOYSA-N	C10H14O3	1.7053	pos	649138	930925	7.37371e+06	1.29949e+07
[10]-Dehydrogingerdione	QJDGTTCAEQPSJA-QBFSEMIESA-N	C21H30O4	1.23396	pos	28623.8	480624	6.19866e+06	1.29939e+07
epi-iridodial glucoside	CGTBKKCAKWNILX-UHFFFAOYSA-N	C16H26O8	2.25512	pos	8.10051e+06	2.33022e+06	600336	1.2987e+07
1,2,7,8-Octanetetrol	TZSZOUXLMCRLSU-UHFFFAOYSA-N	C8H18O4	0.196155	pos	1.16067e+07	1.22397e+07	7.48408e+06	1.29761e+07
RAMMCULIN	TYWXNGXVSZRXNA-UHFFFAOYSA-N	C11H16O8	0.472906	pos	1.87833e+07	5.4675e+06	1.74192e+07	1.29264e+07
5-Acetylsalicylic acid	NZRDKNBIPVLNHA-UHFFFAOYSA-N	C9H8O4	1.41478	neg	7.45438e+06	0	8.07359e+06	1.29083e+07
Isocorniculatolide A	JQXBHAOCMVWRCI-UHFFFAOYSA-N	C18H18O4	0.412402	pos	224639	4.59658e+07	2.06051e+07	1.28829e+07
Acremolide B	AOQQOEQINNPMNK-UHFFFAOYSA-N	C28H40N2O6	0.645665	pos	9.18392e+06	10515.7	7.04024e+06	1.28789e+07
Lasianthuoside A	SYWNPFLHKSCNDM-UHFFFAOYSA-N	C22H22O10	0.352999	neg	7.09308e+06	0	7.91167e+06	1.28618e+07
Stearamide	LYRFLYHAGKPMFH-UHFFFAOYSA-N	C18H37NO	2.47152	pos	2.28042e+08	3.4829e+06	7.97258e+06	1.28611e+07
Crocetin	PANKHBYNKQNAHN-MQQNZMFNSA-N	C20H24O4	0.900576	pos	3.73561e+06	79436.5	5.0299e+06	1.28535e+07
Erythrophlamin	PGXVHINAGNBIAC-UHFFFAOYSA-N	C25H41NO6	13.1165	pos	0	1.21844e+07	7.67788e+06	1.27892e+07
2',4'-DIHYDROXYACETOPHENONE	SULYEHHGGXARJS-UHFFFAOYSA-N	C8H8O3	3.85975	pos	7.24504e+06	1.94743e+06	1.01144e+07	1.27308e+07
DTXSID50847902	APVUNYPUJLEPIY-UHFFFAOYSA-N	C18H18O3	1.6742	neg	5.15554e+06	224686	4.97735e+06	1.27228e+07
Ethyl 7-epi-12-hydroxyjasmonate glucoside	DALGUVBWVCFIPV-ONEGZZNKSA-N	C20H32O9	0.549346	pos	1.58522e+06	1.5236e+07	528938	1.27214e+07
Feruloylguaiacyl hexoside	HULDVRYZOFHPLX-UHFFFAOYSA-N	C23H26O11	1.21227	neg	1.47382e+06	501298	5.6994e+06	1.2688e+07
pescaprein V	CGHNLIHNBHVQMQ-UHFFFAOYSA-N	C57H100O20	4.35935	pos	0	1.32503e+07	9.77904e+06	1.26245e+07
neoazedarachin D	SXRKNAOILVKMHL-UHFFFAOYSA-N	C29H38O10	1.24397	pos	8.04068e+06	88722.7	4.18184e+06	1.26212e+07
DTXSID20709447	OOYCGMQJIWHWHA-UHFFFAOYSA-N	C13H22O3	1.0017	pos	57217.4	792603	7.51196e+06	1.26086e+07
ent-16-hydroxy-3-oxo-13-epi-manoyl oxide	VGHBPRLIBBSXGG-UHFFFAOYSA-N	C20H32O3	0.402978	pos	154243	4.28606e+06	5.0422e+06	1.25834e+07
2-(3,4-dihydroxyphenyl)ethyl 3-O-(6-deoxy-alpha-L-mannopyranosyl)-beta-D-glucopyranoside 4-[(2E)-3-(3,4-dihydroxyphenyl)-prop-2-enoate] 6-[(2E)-3-(4-hydroxyphenyl)-prop-2-enoate]|galypumoside A	VAYFIQLBOLLONO-UHFFFAOYSA-N	C38H42O17	0.297155	neg	9.10748e+06	0	3.14452e+06	1.2563e+07
Pacifidine	YMHZMVWRRKZCMN-UHFFFAOYSA-N	C30H40N2O8	1.36253	neg	0	1.11548e+07	9.43133e+06	1.25217e+07
3-Hydroxydecanoic acid	FYSSBMZUBSBFJL-UHFFFAOYSA-N	C10H20O3	0.481988	neg	2.25075e+06	8.67027e+06	1.30206e+07	1.24832e+07
Ethylbenzene	YNQLUTRBYVCPMQ-UHFFFAOYSA-N	C8H10	2.09325	pos	872491	614637	7.18644e+06	1.24796e+07
2-ALLYLPHENOL	QIRNGVVZBINFMX-UHFFFAOYSA-N	C9H10O	2.24998	pos	689792	262633	7.41136e+06	1.24749e+07
p-Hydroxy-cinnamic acid	NGSWKAQJJWESNS-ZZXKWVIFSA-N	C9H8O3	2.79403	neg	7.92843e+06	505118	8.2745e+06	1.24585e+07
Lyconesidine B	UABXUHQVNRWPBS-UHFFFAOYSA-N	C16H25NO3	0.796732	pos	73712.4	9.08802e+06	1.99816e+07	1.24214e+07
1-O-(3'-methylbut-3'-enyl)-beta-D-glucopyranose|1-O-(3-methylbut-3-en-1-yl)-beta-D-glucopyranose	XJEVPMIXWZHRML-UHFFFAOYSA-N	C11H20O6	0.0850115	neg	6.7358e+06	9232.31	5.84005e+06	1.24138e+07
cirsimarin	RETJLKUBHXTIGH-FZFRBNDOSA-N	C23H24O11	1.13513	pos	5.4908e+06	0	8.52794e+06	1.23657e+07
asperdemin	VSZQTZRSJAGTKI-UHFFFAOYSA-N	C21H28O7	0.984638	pos	509761	1.40562e+06	5.04025e+06	1.23618e+07
Yucalexin P8	OYQREFBZDOJEAT-UHFFFAOYSA-N	C20H26O4	1.15151	pos	138251	1.7386e+06	7.93325e+06	1.23564e+07
Pre-schisanartanin B	XVOAOTAZULSEBL-UHFFFAOYSA-N	C31H42O11	2.02211	pos	4.01177e+06	92795.6	5.28767e+06	1.2347e+07
17-methoxy-2-oxo-corynoxa-16,20-diene-16-carboxylic acid methyl ester|Isorhynchophyllin	VCNYNWHVJKWJRQ-UHFFFAOYSA-N	C22H26N2O4	0.123501	neg	49832.4	2.69365e+07	1.41834e+07	1.23298e+07
Jaeschkenol	XRLMBEOCVFOJBP-UHFFFAOYSA-N	C16H26Cl2O2	0.287588	pos	8.90284e+06	2.70881e+06	5.62733e+06	1.23114e+07
Complanatin	ILBQBCDZPWYQPS-UHFFFAOYSA-N	C10H19N3O2	2.27203	pos	7.72718e+06	9880.59	3.8702e+06	1.22932e+07
licoflavanone	CGKWSLSAYABZTL-UHFFFAOYSA-N	C20H20O5	1.46315	pos	2.21397e+07	0	5.66015e+06	1.2291e+07
CHEMBL469433	LRYVDYNQYBMNJP-UHFFFAOYSA-N	C18H28O3	0.831632	pos	1.2764e+07	137607	4.78615e+06	1.22452e+07
3alpha-acetyloxy-5alpha-pregnan-16-one	WIVPAKVRSDHFJL-UHFFFAOYSA-N	C23H36O3	1.65094	pos	16954.8	1.37009e+07	8.65195e+06	1.22243e+07
Daedaleaside E	RUAKGNYESYUQPT-UHFFFAOYSA-N	C41H62O11	0.288255	pos	6.71846e+06	2.26163e+06	4.44952e+06	1.22083e+07
2-methylidene-4-[(2R,3R,4S,5S,6R)-3,4,5-trihydroxy-6-(hydroxymethyl)oxan-2-yl]oxybutanoic acid	QJALTHDWQWOLLT-ZBGLXGBJSA-N	C11H18O8	0.194891	pos	0	1.37917e+06	9.17215e+06	1.21753e+07
Irilone	NUGRQNBDTZWXTP-UHFFFAOYSA-N	C16H10O6	0.178954	pos	5.46862e+06	95024.5	6.07033e+06	1.21596e+07
(1R,2S,4R,5S,6R,7R,9S,10S)-1,9-dibenzoyloxy-2,6,15-triacetoxy-8-oxo-dihydro-beta-agarofuran	UPKPCBUBBFEYEF-UHFFFAOYSA-N	C35H38O12	1.17122	pos	369703	170786	1.95845e+07	1.21478e+07
methyl 3alpha,4beta-dihydroxy-neo-clerodan-15-oate	SIPUAJNOWFIDSZ-UHFFFAOYSA-N	C21H38O4	1.97507	pos	66684.4	2.00931e+07	1.31389e+07	1.2147e+07
Methyl hexadecanoate	FLIACVVOZYBSBS-UHFFFAOYSA-N	C17H34O2	2.59706	neg	156360	6.65883e+06	8.7691e+06	1.21235e+07
3-O-Alloside-Cerberidol-Cerberidol|cerberidol-3-O-beta-D-allopyranoside	HLXIDWOXFIYQOX-UHFFFAOYSA-N	C15H26O8	0.935508	neg	77405.9	334617	5.55486e+06	1.21233e+07
maytensifolin A|Maytensifolin-A	WSVAJLWNDHCMEJ-UHFFFAOYSA-N	C29H48O3	1.47173	pos	0	1.86331e+06	3.33955e+06	1.21177e+07
5-acetyloxy-3-methylpent-2-enoic acid	WRWUZZKIEIMUGX-UHFFFAOYSA-N	C8H12O4	1.21972	neg	3.04547e+06	2.0392e+07	1.70871e+07	1.21135e+07
5-Formylxanthotoxol	JZLIADGKTKXZFY-UHFFFAOYSA-N	C12H6O5	1.01722	pos	3.98695e+06	7805.99	8.72877e+06	1.21081e+07
Auxin a	RKOUCPMGBBKLNK-UHFFFAOYSA-N	C18H32O5	1.25769	neg	1.42662e+07	35025.4	2.43489e+06	1.2096e+07
Cascaroside D	GQPFUOPPYJYZHE-OPEXUXIQSA-N	C27H32O13	0.225271	pos	435947	159584	8.72901e+06	1.2045e+07
Isoflavone base + 3O, O-MalonylHex	FRAUJUKWSKMNJY-UHFFFAOYSA-N	C24H22O13	1.28831	pos	6.61e+06	9926.95	5.81368e+06	1.20446e+07
methyl ent-2,4-seco-15,16-epoxy-4-oxo-3,19-dinorbeyer-15-en-2-oate	SZQCLROOGAWENL-UHFFFAOYSA-N	C19H28O4	2.0386	pos	125813	279930	5.27228e+06	1.19952e+07
Cichoric acid	YDDGKXBLOXEEMN-IABMMNSOSA-N	C22H18O12	0.675593	neg	2.16276e+06	475005	5.61145e+06	1.19931e+07
7-[(6-Hydroxy-3,7-dimethyl-2,7-octadienyl)oxy]-2H-1-benzopyran-2-one	OWAQHJLCKMIPKB-GXDHUFHOSA-N	C19H22O4	1.09877	pos	3.83477e+06	530011	6.04096e+06	1.19804e+07
5-(2-Hydroxypropyl)hygrine	UBTBXKBPQCPOTA-UHFFFAOYSA-N	C11H21NO2	2.00456	pos	5.12091e+06	0	5.88538e+06	1.19752e+07
CHEMBL1087643	YRVGMUCBUGPWMR-UHFFFAOYSA-N	C18H29NO3	25.0858	pos	1.24757e+06	0	4.95941e+06	1.19672e+07
Astragaloside VI	FLPVEPQEIRRVKG-SXCMWBRFSA-N	C47H78O19	1.30128	pos	9.48799e+06	76229.6	3.78808e+06	1.196e+07
(Z)-3-[4-methoxy-2-[(2S,3R,4S,5S,6R)-3,4,5-trihydroxy-6-(hydroxymethyl)oxan-2-yl]oxyphenyl]prop-2-enoic acid	FQWZGEBZILOCET-UHFFFAOYSA-N	C16H20O9	1.84791	neg	1.32771e+06	252944	4.83292e+06	1.19582e+07
p-Menthane-1,2,3,4-tetraol	FQWSJPMTOUOVCC-UHFFFAOYSA-N	C10H20O4	1.45556	neg	1.26606e+07	257589	4.84508e+06	1.194e+07
1-dehydrogingerdione	FZWNRFAUDBWSKY-UHFFFAOYSA-N	C17H22O4	1.73459	pos	7.76728e+06	526697	4.794e+06	1.19311e+07
(2'S,2''S)-5-(2'',3''-Epoxy-3''-methylbutyl)-3-(3'-hydroxy-1'-(Z,Z)-linoleoyloxy-3'-methylbut-2'-yl)indole	NTQKOIIVKYUAIJ-UHFFFAOYSA-N	C36H55NO4	1.10255	pos	0	2.09102e+07	1.1199e+07	1.19276e+07
Vanillin acetate	PZSJOBKRSVRODF-UHFFFAOYSA-N	C10H10O4	0.575612	pos	2.22452e+06	2.24284e+06	8.84082e+06	1.19155e+07
Spergulin B	OXJDWSLZGBHGCI-UHFFFAOYSA-N	C39H64O11	3.22326	pos	0	1.15134e+07	9.42934e+06	1.19087e+07
Coriandrin	BUZQIMYNOWPYHH-UHFFFAOYSA-N	C13H10O4	0.0100467	neg	0	3.21284e+06	4.77388e+06	1.19058e+07
Deoxycholic acid	KXGVEGMKQFWNSR-LLQZFEROSA-N	C24H40O4	0.368041	neg	0	1.3151e+07	2.30357e+06	1.19056e+07
MCULE-1023551956	VKCTYACKTCTDRG-UHFFFAOYSA-N	C23H40O5	1.99385	pos	0	6.0994e+06	6.63762e+06	1.18602e+07
PHENYLACETIC ACID	WLJVXDMOQOGPHL-UHFFFAOYSA-N	C8H8O2	2.26592	neg	7.01143e+06	410818	6.98524e+06	1.18502e+07
(3aS,5aS,6R,9aR,9bS)-(3a-hydroxy-6,9a,9b-trimethyl-3,7-dioxo-dodecahydrocyclopenta[alpha]naphthalen-6-yl)acetic acid|Barbacenic acid	PUZKHWFCLGKPQB-UHFFFAOYSA-N	C18H26O5	2.11759	neg	68695.3	965081	6.96039e+06	1.18224e+07
Sinapic acid	PCMORTLOPMLEFB-ONEGZZNKSA-N	C11H12O5	1.3467	neg	7.54793e+06	285815	9.12466e+06	1.18117e+07
4-Oxo-Delta9,Delta11,Delta13-octadecatrien-saeuremethylester	BGHALTBJTYRCGM-UHFFFAOYSA-N	C19H30O3	1.42651	pos	172353	1.20156e+06	5.56917e+06	1.18025e+07
13-Hydroxy-9,11-hexadecadienoic acid	MMCGXPYQSCQHMN-UHFFFAOYSA-N	C16H28O3	0.00989434	neg	15498.4	6.09363e+06	5.30475e+06	1.17919e+07
(9S,13S)-12-Oxophytodienoic acid	PMTMAFAPLCGXGK-UHFFFAOYSA-N	C18H28O3	0.450384	pos	1.34771e+07	76517.3	4.22519e+06	1.1784e+07
Didymin	RMCRQBAILCLJGU-HIBKWJPLSA-N	C28H34O14	0.292065	pos	1.8253e+07	0	8.89956e+06	1.17747e+07
[10]-Shogaol	FADFGCOCHHNRHF-VAWYXSNFSA-N	C21H32O3	0.992845	pos	0	4.01661e+06	5.19408e+06	1.17719e+07
Norecasantalic acid	LDSSHHGVKDZTIX-UHFFFAOYSA-N	C11H16O2	0.651989	neg	915400	2.06816e+07	8.67819e+06	1.17277e+07
Cauliflorin A	OHKLPDQPGIVELF-UHFFFAOYSA-N	C18H12O4	0.685869	pos	7.43905e+06	95193.6	3.14379e+06	1.17113e+07
3,4-Dihydroxymandelic acid	RGHMISIYKIHAJW-UHFFFAOYSA-N	C8H8O5	2.58054	pos	3.6914e+06	0	6.72395e+06	1.17069e+07
8-Zinniol 2-(phenyl)ethyl ether	KSINIIUYJKHDNX-UHFFFAOYSA-N	C23H30O4	0.880414	neg	0	1.19327e+07	8.56386e+06	1.1673e+07
Salvianolic acid D	AMPDZVASNOBSQZ-UHFFFAOYSA-N	C18H12O7	1.02731	pos	5.7535e+06	20242.8	7.38259e+06	1.16648e+07
Gaudichaudianic acid, (-rac)	TXHBNVYFCZMCPB-UHFFFAOYSA-N	C22H28O3	0.601445	neg	5.01454e+06	8.54528e+06	1.63529e+07	1.16606e+07
4-O-(6-deoxy-4-O-beta-D-glucopyranosyl-beta-D-glucopyranosyl)diphyllin|9-(1,3-benzodioxol-5-yl)-4-[(6-deoxy-4-O-beta-D-glucopyranosyl-beta-D-glucopyranosyl)oxy]-6,7-dimethoxynaphtho[2.3-c]furan-1(3H)-one|mananthoside C	GDROJZMLSNLPRF-UHFFFAOYSA-N	C33H36O16	2.22066	pos	5.78333e+07	0	3.93764e+07	1.16503e+07
Juncunone	KDADJLHRXRSXQU-UHFFFAOYSA-N	C18H18O3	0.0223494	pos	1.483e+06	536660	2.5273e+06	1.16483e+07
Demethylzeylasteral	ZDZSFWLPCFRASW-CPISFEQASA-N	C29H36O6	1.13312	pos	233438	3.80711e+06	4.58158e+06	1.16199e+07
turrapubesin G	PYCKPNAFYRNXSN-UHFFFAOYSA-N	C34H44O11	0.464558	neg	7.30875e+06	84372	6.05717e+06	1.1575e+07
SCHEMBL4823845	WJMOFJJTTHNUOH-UHFFFAOYSA-N	C9H14O3	1.10483	pos	1.25989e+07	582840	5.44266e+06	1.1568e+07
Cortisone	MFYSYFVPBJMHGN-ZPOLXVRWSA-N	C21H28O5	0.266743	pos	309905	127329	6.85263e+06	1.15494e+07
3-(4-methoxyphenyl)-7-({6-O-[(E)-1-oxobut-2-en-1-yl]-beta-D-glucopyranosyl}oxy)-4H-1-benzopyran-4-one|4'-methoxyisoflavone 7-O-beta-D-{6-[(E)-but-2-enoyl]}glycoside|ammopiptanoside A	UNGLMQNWMJMOML-UHFFFAOYSA-N	C26H26O10	0.509327	pos	4.65983e+06	0	5.64689e+06	1.15383e+07
cyclocanthoside A	QGFYQPMSVSDISL-UHFFFAOYSA-N	C35H60O9	6.40021	neg	0	1.43386e+07	1.11556e+07	1.14826e+07
penitrem G	NKDIIHTXCWIGFT-UHFFFAOYSA-N	C37H45NO5	0.821661	pos	0	2.9402e+07	1.92087e+07	1.14741e+07
Ilamine	AKQZEFRALAUBFS-UHFFFAOYSA-N	C16H27NO5	1.58299	pos	7.81488e+06	0	4.52316e+06	1.1443e+07
13-(S)-hydroxy-N-(O-methyl)septoriamycin A	SHGAESAOOZYSHY-UHFFFAOYSA-N	C23H31NO5	0.623277	pos	427307	43521.6	6.3794e+06	1.14339e+07
(all-E)-octadeca-2,9,11,13,15-pentaenal|pseudogynoxal	ABCBBMZSTXBGMW-UHFFFAOYSA-N	C18H26O	0.896665	pos	6.5324e+06	0	2.81563e+06	1.14328e+07
(-)-Syringaresinol	KOWMJRJXZMEZLD-WRMVBYCNSA-N	C22H26O8	1.23151	pos	6.39053e+06	0	2.77544e+06	1.14055e+07
(20R*,22R*)-N-methyl-5,6,12,13-tetrahydro-3beta,23beta-dihydroxy-5alpha,13beta,17beta,25alpha-veratraman-7,12(14)-dien-6-one|puqienine E	IBEOCWMHXLQQTF-UHFFFAOYSA-N	C28H43NO3	0.585384	pos	148763	80483.6	705221	1.13895e+07
(5alpha)-vouacapa-8(14),9(11)-diene	QWTSMPKFTJSMFD-UHFFFAOYSA-N	C20H26O	0.605693	pos	3.03719e+06	4.16957e+06	5.43436e+06	1.13839e+07
(+/-)-8-{4-oxo-5-[E-pent-2-en-E-ylidene]cyclopent-2-enyl}octanoic acid methyl ester|methyl 8-<(2E)-3-oxo-2-((E)-2-pentenylidene)-4-cyclopentenyl>octanoate	DBGHMVTUIZIOCE-UHFFFAOYSA-N	C19H28O3	2.94201	pos	575276	204747	7.32748e+06	1.13461e+07
Butyl (S)-3-hydroxybutyrate [arabinosyl-(1->6)-glucoside]	MLIAQAVEASULJH-UHFFFAOYSA-N	C19H34O12	2.14057	pos	76295	1.16157e+07	1.3512e+07	1.13459e+07
2-carboxyl-4-(3-methyl-but-2-enyl)-5-methoxy-(1,1'-biphenyl)-3-ol	WWVKMRSBEOZJGH-UHFFFAOYSA-N	C19H20O4	1.81872	pos	1.26992e+07	235508	4.73944e+06	1.13395e+07
Phytosphingosine (not validated, isomer of 1697)	AERBNCYCJBRYDG-UHFFFAOYSA-N	C18H39NO3	1.73409	pos	5.47308e+06	6.70867e+06	1.9288e+07	1.13325e+07
Indole-3-pyruvic acid	RSTKLPZEZYGQPY-UHFFFAOYSA-N	C11H9NO3	1.33805	pos	5.15866e+06	1.74891e+06	6.02902e+06	1.13131e+07
SCHEMBL21461644	NXXWABNFHWFQKC-UHFFFAOYSA-N	C18H36O7	2.09447	neg	6.82972e+06	224787	3.97768e+06	1.12976e+07
3-O-p-coumaroyl-6-O-feruloyl-beta-D-fructofuranosyl 6-O-acetyl-alpha-D-glucopyranoside	WORYROBPYQCALN-UHFFFAOYSA-N	C33H38O17	2.32043	pos	9.31309e+06	0	3.2875e+06	1.12826e+07
2-(4-ethenyl-4-methyl-3-prop-1-en-2-ylcyclohexyl)propan-2-yl acetate	WIOCBQJVVCZHFB-UHFFFAOYSA-N	C17H28O2	0.423348	neg	0	5.16202e+06	909207	1.12716e+07
N-(3-Methoxybenzyl)palmitamide	FIQGQTITXPTKIY-UHFFFAOYSA-N	C24H41NO2	0.143864	pos	726035	2.76102e+06	2.58606e+06	1.12558e+07
Cocculitine	IWHSXINBLNSAAY-UHFFFAOYSA-N	C18H23NO3	1.38394	pos	4.96852e+06	1.17264e+06	4.77057e+06	1.12554e+07
recedensic acid	FEXCQDDIIOTBFK-UHFFFAOYSA-N	C23H34O5	2.49251	neg	0	9.52054e+06	9.5899e+06	1.12512e+07
Pisonin C	JMJBXDWFZVLFDK-UHFFFAOYSA-N	C10H8O5	0.801881	neg	1.22655e+06	0	5.39755e+06	1.12422e+07
9,12-Octadecadien-1-ol, (9Z,12Z)-	JXNPEDYJTDQORS-UHFFFAOYSA-N	C18H34O	0.903353	pos	0	1.11319e+07	1.02528e+07	1.1238e+07
Karacoline	HKQZUYOVMYOFIT-JEJCSOMWSA-N	C22H35NO4	1.70279	pos	5.46678e+06	0	4.78961e+06	1.1209e+07
Hellicoside	IKASMYQBXBUEQS-AEAUTZEXSA-N	C29H36O17	1.37218	pos	22783	1.28593e+07	7.85088e+06	1.12021e+07
Pangamic acid	RVSTWRHIGKXTLG-UHFFFAOYSA-N	C20H40N2O8	1.61491	pos	0	1.45078e+07	2.56928e+06	1.1197e+07
Kinoin C	CMYCRANAYNKFHR-UHFFFAOYSA-N	C24H36O4	0.152862	pos	51454.3	8.16451e+06	1.68015e+06	1.11882e+07
1-[5,7-dihydroxy-2,2-dimethyl-6-(3-methylbut-2-enyl)chromen-8-yl]-3-(4-hydroxyphenyl)prop-2-en-1-one	KRZGSPKDWYNTHE-UHFFFAOYSA-N	C25H26O5	1.79838	neg	0	1.43402e+07	1.24982e+07	1.11827e+07
laureacetal-A	BQERDPIYHVBRCF-UHFFFAOYSA-N	C15H21BrO2	0.0690823	pos	3.43241e+06	6.72329e+06	8.30697e+07	1.11774e+07
Alseodafuranone	VTDDQAZZUPRKJW-UHFFFAOYSA-N	C17H32O3	1.01821	pos	35312.8	9.4757e+06	1.39426e+07	1.11744e+07
Lupulone B	MJXCRNGPAMBYDU-UHFFFAOYSA-N	C25H34O4	0.419867	neg	0	1.39887e+07	1.14793e+07	1.11328e+07
CHEMBL3397404	WWGOYNYKPSPHDA-UHFFFAOYSA-N	C16H10O4	0.973541	pos	1.17802e+06	0	5.42951e+06	1.1117e+07
2'-acetyl-6'-{[2-hydroxy-3-(1-beta-D-glucopyranosyloxy)]benzoyl}sweroside|verbenoside B	WFJWXFWTKVMYJL-UHFFFAOYSA-N	C31H38O18	2.14032	neg	1.46955e+07	0	3.53472e+06	1.10868e+07
SCHEMBL16362151	FPHYDTVJYBKPCG-UHFFFAOYSA-N	C40H38O10	1.79687	pos	1.11518e+07	1.97191e+06	2.21304e+06	1.10806e+07
L-Threonine	AYFVYJQAPQTCCC-GBXIJSLDSA-N	C4H9NO3	3.17896	pos	1.85561e+07	0	3.02216e+06	1.10767e+07
(-)-3,16-dioxolanosta-8,24-dien-21-oic acid|pinicolic acid B	MBPMNCWCPNRGJT-UHFFFAOYSA-N	C30H42O4	1.98948	neg	24073.7	1.77053e+07	9.32976e+06	1.10694e+07
erythro-2-Hydroxy-2-(1-hydroxyethyl)-4-methyl-pentanoic acid|erythro-2-Hydroxy-2-(1-hydroxyethyl)-4-methylpentanoic acid	PMKMKKQUJDGCNG-UHFFFAOYSA-N	C8H16O4	2.02361	pos	7.95524e+06	1.03361e+07	1.4478e+07	1.10686e+07
crassirhizomoside C|kaempferol 3-O-alpha-L-(2,3-di-O-acetyl)rhamnopyranoside-7-O-alpha-L-rhamnopyransoside	DEAZUHJDGGUCSW-UHFFFAOYSA-N	C31H34O15	0.736569	pos	0	1.00586e+07	1.26327e+07	1.10398e+07
Acarogobien B	MARCXTHIFQNPLR-UHFFFAOYSA-N	C29H30Br2O6	2.40489	neg	1.67915e+07	0	9.24152e+06	1.10346e+07
6E,8E-Hexadecadien-10,12,14-triinsaeure-methylester|Me ester-(all-E)-6,8-Hexadecadiene-10,12,14-triynoic acid	CUMJUAKBQLFGIE-UHFFFAOYSA-N	C17H18O2	0.457944	neg	5.4886e+06	178202	4.90659e+06	1.10308e+07
dopargine	JYDSKJBPKMQERO-UHFFFAOYSA-N	C13H19N3O2	1.76252	pos	233258	0	5.9983e+06	1.10269e+07
15-((3aXi,11bR)-8,11c-dihydroxy-3-methyl-6-oxo-(11cc)-2,3,3a,5,6,11c-hexahydro-1H,4H-indolo[3,2,1-de][1,5]naphthyridin-11br-yl)-19-hydroxy-16,17-dimethoxy-1-methyl-3,4-didehydro-aspidospermidin-21-oic acid 19-lactone|Cimiciphytin|cimiciphytine	RHJDWXMFWUJUBI-UHFFFAOYSA-N	C37H42N4O7	2.87092	neg	186368	6.78036e+06	1.22495e+07	1.10128e+07
Phenol, 4-methoxy-2-(3-methyl-2-butenyl)-	GKAOOQRLNNPWFH-UHFFFAOYSA-N	C12H16O2	0.138707	pos	176410	675692	6.93091e+06	1.10123e+07
CHEMBL2147419	DZMMGSFVLBBPIA-UHFFFAOYSA-N	C18H18O4	3.26837	pos	5.24807e+06	0	5.10459e+06	1.09932e+07
rel-(5beta,8alpha,10alpha)-8-hydroxy-13-methylpodocarpa-9(11),13-diene-3,12-dione	FXAYQQBRGABVCZ-UHFFFAOYSA-N	C18H24O3	1.61189	pos	5.14893e+06	232164	4.51159e+06	1.09572e+07
2,4-tetradecadienoic acid isobutyl amide	AGJAUFUNZWHLKE-UHFFFAOYSA-N	C18H33NO	0.68775	pos	50542.4	1.02882e+07	1.46765e+07	1.09563e+07
beauvenniatin F	IDKHVAXRADBCAM-UHFFFAOYSA-N	C40H63N3O9	4.77251	pos	98186.3	6.27278e+06	4.18093e+06	1.09442e+07
3,7-dimethyl-1-hydroxy-7-peroxy-octa-2E,5E-dien-4-one|7-Hydroperoxide-(2E,5E)-1,7-Dihydroxy-3,7-dimethyl-2,5-octadien-4-one	XJJPOJYHJBZLMP-UHFFFAOYSA-N	C10H16O4	0.812802	pos	343137	274089	7.05173e+06	1.09266e+07
TAURINE	XOAAWQZATWQOTB-UHFFFAOYSA-N	C2H7NO3S	4.02727	neg	338478	1.11175e+07	5.30568e+06	1.09224e+07
8,12:15,16-Diepoyx-13(16),14-labdadiene-(8alpha,13alphaH)-form	QDBSAAZIAMLNBF-UHFFFAOYSA-N	C20H30O2	0.0877606	pos	148789	1.0382e+07	6.73662e+06	1.09185e+07
2-(Hentriacontane-1-yl)-5,7-dihydroxy-8-methyl-4H-1-benzopyran-4-one	MJYQBVQGXNMYSG-UHFFFAOYSA-N	C41H70O4	1.88669	pos	83975.3	2.76974e+06	0	1.09022e+07
(+)-pentandranoic acid A|2-formyl-12-oxo-A-norcleroda-2,13(16)-dien-15-oic acid|pentandranoic acid A	GEYOTLVJLLCPMD-UHFFFAOYSA-N	C20H28O4	0.840957	neg	8.76761e+06	390250	6.62701e+06	1.08853e+07
25,28-dihydroxy-D:A-friedo-oleanan-3-one|25,28-dihydroxy-D:A-friedooleanan-3-one	AWMRHFLVHKGHMJ-UHFFFAOYSA-N	C30H50O3	2.01838	neg	3.96584e+06	0	2.9176e+06	1.07948e+07
[4beta(2Z,4E)]-4-[6-[2-(2,5-Dihydro-5-oxo-3-furanyl)ethoxy]-7-hydroxy-2,4-octadienoate]12,13-epoxytrichothec-9-ene-4,15,16-triol	CCTSCDKRPDPVEO-UHFFFAOYSA-N	C29H38O10	1.19127	neg	286044	11884.8	3.84245e+06	1.07911e+07
2-Deoxy-4-[5'-Methyl-[2,2'-bithiophen]-5-yl]-3-butyne-1,2-diol|5'-methyl-[5-(4-hydroxy-1-butynyl)]-2,2'-bithiophene	ADQMFRWVCORNJP-UHFFFAOYSA-N	C13H12OS2	0.946222	pos	7.30603e+06	109715	6.32424e+06	1.07894e+07
Erosnin	YQXNKHVPEJJBTJ-UHFFFAOYSA-N	C18H8O6	1.22207	neg	1.44697e+06	0	4.45682e+06	1.0777e+07
(6S,13R)-6,13-dihydroxy-2E,4E,8E-tetradecatrienoic acid	OEZQQSZLPKFDKK-UHFFFAOYSA-N	C14H22O4	0.780945	pos	1.55412e+06	6.18473e+06	7.61232e+06	1.07743e+07
20-Deoxyingenol	FOSYZKSOJUQLTD-NHPMXQBPSA-N	C20H28O4	2.9795	neg	777216	1.17092e+06	4.00284e+06	1.07583e+07
Glochidioside Q	PFKUXHMIHJHOPX-UHFFFAOYSA-N	C49H74O16	0.579241	neg	6.96057e+06	0	3.94608e+06	1.07566e+07
Pityriazole	UPORVYGDZIGCGB-UHFFFAOYSA-N	C21H14N2O3	1.49166	pos	0	0	1.6944e+07	1.0749e+07
cordycepin	OFEZSBMBBKLLBJ-BAJZRUMYSA-N	C10H13N5O3	1.1876	pos	791555	138516	1.28949e+07	1.07412e+07
Octahydrocurcumin	OELMAFBLFOKZJD-UHFFFAOYSA-N	C21H28O6	0.978863	pos	179300	1.49147e+07	1.03338e+07	1.06974e+07
Neovasipyridone A	NAMOYKKVUOAEJB-UHFFFAOYSA-N	C21H35NO3	0.300714	pos	0	1.42229e+06	4.55878e+06	1.06922e+07
Polyporusterone B	OQDKHYZVFZGSRC-UHFFFAOYSA-N	C28H44O6	0.950139	neg	0	8.72582e+06	4.97217e+06	1.06726e+07
Melnerin B	PMLDPELCCCGCIU-UHFFFAOYSA-N	C21H30O7	11.7477	neg	1.51931e+06	6.35438e+06	6.35612e+06	1.06724e+07
L-Tryptophan	QIVBCDIJIAJPQS-VIFPVBQESA-N	C11H12N2O2	19.2272	pos	786168	6.52044e+06	6.675e+06	1.06522e+07
Yuccaol C	UMQRRGZFEXVPFD-NSCUHMNNSA-N	C30H22O10	0.986224	pos	3.48324e+07	148572	8.14071e+06	1.06436e+07
russulaflavidin	SJEIHHJIJLJHOL-UHFFFAOYSA-N	C28H36O3	2.07304	neg	0	1.88997e+07	1.58618e+07	1.06412e+07
8beta-hydroxy-11alpha,12beta-diacetoxypimar-16-ene	NBNQZOYMSZEVNS-UHFFFAOYSA-N	C24H38O5	0.0715048	pos	0	6.02039e+06	1.21652e+06	1.0625e+07
3-Formyl-6-hydroxyindole	FAFBOYSDWMRMLQ-UHFFFAOYSA-N	C9H7NO2	2.41083	pos	1.06483e+07	2.0607e+07	1.97752e+07	1.06128e+07
14-METHYLHEXADECANOIC ACID	FXUKWLSZZHVEJD-UHFFFAOYSA-N	C17H34O2	0.890622	neg	96944.5	3.05682e+07	1.72342e+07	1.06019e+07
SCHEMBL6766368	IYZZWBYZVBUCPI-UHFFFAOYSA-N	C19H34O5	1.15108	neg	0	1.2568e+06	9.1236e+06	1.05693e+07
FT-0775947	IVYWRYGMQNKDQB-UHFFFAOYSA-N	C28H38O11	3.24176	pos	6.65999e+06	758323	4.13158e+06	1.05539e+07
Eupteleasaponin V acetate	LYWXZPBBKGMADN-UHFFFAOYSA-N	C48H72O18	1.01174	pos	8.0402e+06	0	5.11198e+06	1.05234e+07
Notoginsenoside I	LGUXGTQKNVOCIU-UHFFFAOYSA-N	C54H92O22	1.93309	pos	0	1.45247e+07	1.06052e+07	1.05158e+07
Macrodaphniphyllidine	MKTDIBSWZNDBPU-UHFFFAOYSA-N	C25H35NO4	0.555958	neg	5.77967e+06	8.32619e+06	3.76516e+06	1.04803e+07
Foliosidine	IUPYLWAXGAJZQC-UHFFFAOYSA-N	C16H21NO5	0.408598	pos	1.20255e+07	9535.52	5.04663e+06	1.04748e+07
7-Hydroxy-4-isopropyl-6-methylcoumarin	UFVKXIXGJJWITR-UHFFFAOYSA-N	C13H14O3	1.26244	neg	4.01412e+06	258048	5.92128e+06	1.04717e+07
Norcaperatic acid	ABKLOAXZFTXYAG-UHFFFAOYSA-N	C20H36O7	1.66481	pos	331365	1.33706e+07	1.17226e+07	1.04385e+07
Vitrofolal F	FEHGMZDBZVCEBR-UHFFFAOYSA-N	C19H16O6	1.69081	pos	274319	485869	4.74237e+06	1.04374e+07
(22R)-4beta-hydroxy-1-oxo-witha-2,5,16,24-tetraenolide|(4S,20S,22R)-4-hydroxy-1-oxo-witha-2,5,16,24-tetraenolide	JDUIGAYKAPJCHV-UHFFFAOYSA-N	C28H36O4	1.92589	neg	344113	1.20349e+07	1.61512e+07	1.0403e+07
(3'x,5'a,9'x,10'b)-O-(3-Hydroxy-6-oxo-7-drimen-11-yl)umbelliferone	HIQLOIOGTRDMIW-UHFFFAOYSA-N	C24H28O5	2.88998	neg	0	4.63941e+06	2.27781e+06	1.04001e+07
Benzoic acid + 2O, O-Pen	VWQASRWQZBVNEI-UHFFFAOYSA-N	C12H14O8	1.36822	neg	1.29939e+06	326526	3.24798e+06	1.03896e+07
p-Hydroxybenzaldehyde	RGHHSNMVTDWUBI-UHFFFAOYSA-N	C7H6O2	3.25964	neg	6.65699e+06	5.01251e+06	6.69139e+06	1.03813e+07
Broussonetine Q	MUCSYLGPBJVHGW-UHFFFAOYSA-N	C30H55NO15	0.51111	pos	5.59225e+06	28448.1	5.40733e+06	1.03521e+07
3-acetyl-2-(3'-hydroxy-3'-methyl)glutarylanhydrocrustulinol	KLBORFZHMCIDPM-UHFFFAOYSA-N	C38H58O10	0.0665488	pos	1.57964e+06	43262.6	2.53036e+07	1.03441e+07
Hypnumbiflavonoid A	KKFWUGTXANEERY-UHFFFAOYSA-N	C30H22O12	1.42448	pos	690858	22266.8	1.65155e+07	1.0334e+07
Quercetin 3-(3'',4''-diacetylrhamnosyl)-(1->6)-glucoside	OILJXSBGQQNYAQ-UHFFFAOYSA-N	C31H34O18	2.53059	pos	1.43214e+06	0	6.33436e+06	1.03316e+07
Ampelomin F	DKCGTIMNFPMKNS-UHFFFAOYSA-N	C7H14O3	0.922059	neg	7.26609e+06	703558	8.5273e+06	1.03303e+07
SCHEMBL16226384	RIIKBAQXZPVQQV-UHFFFAOYSA-N	C19H14O7	1.55199	neg	1.99619e+06	11015.3	8.46513e+06	1.03256e+07
Bisdemethoxycurcumin	PREBVFJICNPEKM-YDWXAUTNSA-N	C19H16O4	1.07926	pos	304921	0	3.76203e+06	1.03194e+07
Genkwanin	JPMYFOBNRRGFNO-UHFFFAOYSA-N	C16H12O5	0.429465	neg	5.06025e+06	395256	5.66804e+06	1.0292e+07
2-(2-hydroxy-4-methoxyphenyl)-5-(3-hydroxy-(E)-1-propen-1-yl)benzofuran|2-(2-Hydroxy-4-methoxyphenyl)-5-(3-hydroxy-1-propenyl)benzofuran|2-(2-hydroxy-4-methoxyphenyl)-5-<3-hydroxy-(E)-1-propen-1-yl>benzofuran	ZXAWXFOFNZHBCH-UHFFFAOYSA-N	C18H16O4	1.01717	pos	1.57563e+07	0	3.11897e+06	1.02862e+07
Aspergillin	FIVPIPIDMRVLAY-UHFFFAOYSA-N	C13H14N2O4S2	0.669374	pos	0	1.13737e+06	7.53221e+07	1.02841e+07
C25H22O5	JCKXVEVCXNXGQW-UHFFFAOYSA-N	C25H22O5	1.79094	neg	0	9.44431e+06	7.66482e+06	1.02615e+07
(2E,4E,6E)-cyclo-[(NMe-L-Ala)-(NMe-L-Val)-(Nalpha-octa-2,4,6-trienoyl-L-Lys)]|sclerotiotide C	WTFVTPDZPCKVCO-UHFFFAOYSA-N	C24H38N4O4	1.04596	pos	113148	1.42606e+07	1.13967e+07	1.02594e+07
8-(2,3-dihydroxy-3-methylbutyl)-7-methoxychromen-2-one	KGGUASRIGLRPAX-UHFFFAOYSA-N	C15H18O5	0.459797	pos	8.14315e+06	237173	5.59088e+06	1.02517e+07
Quinoline	SMWDFEZZVXVKRB-UHFFFAOYSA-N	C9H7N	1.60417	pos	171593	1.27512e+07	8.88948e+06	1.02256e+07
Methyl 4Z-octenoate	SSPBQLGVUAXSMH-AATRIKPKSA-N	C9H16O2	0.756997	pos	227149	188652	5.67485e+06	1.02189e+07
Prosapogenin A	HDXIQHTUNGFJIC-FOAHKCLGSA-N	C39H62O12	0.479043	pos	0	4.17315e+06	9.09734e+06	1.02153e+07
Pygenic acid B a	JXSVIVRDWWRQRT-UMCOSQRYSA-N	C30H48O5	0.61365	neg	3.42265e+06	174592	4.97816e+06	1.0192e+07
Clauslactone R	PERYWCVGFJULIR-UHFFFAOYSA-N	C20H20O7	2.08325	neg	317770	4.66742e+06	5.15048e+06	1.01865e+07
(10'R)-2,4-dihydroxy-6-(10'-methoxyundecyl)benzoic acid	GATBOCSPUDOBIM-UHFFFAOYSA-N	C19H30O5	2.57666	pos	663358	177987	1.10457e+07	1.01848e+07
4,6,10-Triacetoxy-5a-(acetoxymethyl)-3,4,5,5a,6,7,8,9-octahydro-2,2,9-trimethyl-5-(3-pyridylcarbonyloxy)-2H-3,9a-methano-1-benzooxepin	SQFNSXGWZVTVDY-UHFFFAOYSA-N	C29H37NO11	0.344174	pos	4.72223e+06	9910.95	5.16715e+06	1.01825e+07
Ethanone, 1-(1-hydroxy-8-methoxy-3-methyl-2-naphthalenyl)-	VSFUBAXYDFGXOP-UHFFFAOYSA-N	C14H14O3	0.826801	pos	2.55063e+06	275491	5.14032e+06	1.01707e+07
12:4+4O fatty acyl hexoside	JWAGJGCOOSEMAU-UHFFFAOYSA-N	C18H28O10	2.1665	neg	7.79321e+06	47922.9	5.86042e+06	1.01689e+07
ent-15-Acetoxy-7,13-labdadien-2beta-ol	CZUWIMDOXXXJRE-UHFFFAOYSA-N	C22H36O3	1.4007	neg	0	8.3492e+06	7.18874e+06	1.01675e+07
methyl glycerate	COFCNNXZXGCREM-UHFFFAOYSA-N	C4H8O4	0.346289	neg	4.3397e+06	2.37692e+06	5.7372e+06	1.01538e+07
Erythrophloin B	ILBLNWRALCTWGL-UHFFFAOYSA-N	C25H38O2	1.51492	pos	4138.72	3.10169e+06	3.70608e+06	1.01531e+07
Aristolic acid	WNMKOPJJPJHXJX-UHFFFAOYSA-N	C17H12O5	1.76434	pos	1.21321e+08	125655	4.71073e+06	1.01392e+07
Excelsin	OQQPVKBRTSQMEC-UHFFFAOYSA-N	C25H36O9	2.16877	pos	7.75788e+06	77892.8	5.10152e+06	1.01302e+07
2alpha,3beta,4beta,18-tetrahydroxypregn-5-en-16-one	FDYFHSWLEFIUMG-UHFFFAOYSA-N	C21H32O5	0.391632	pos	1.22188e+06	438447	2.75602e+06	1.01278e+07
4-Nonanone	TYBCSQFBSWACAA-UHFFFAOYSA-N	C9H18O	2.30054	neg	0	7.95048e+06	5.6122e+06	1.01004e+07
FT-0669044	OWMHCYFEIJPHFB-UHFFFAOYSA-N	C25H24O13	0.948599	pos	5.68309e+06	58474.6	5.35174e+06	1.00786e+07
(2E,3R,4R)-2-(11-dodecenylidene)-3-hydroxy-4-methoxy-4-methylbutanolide	WBGZYWAQSKEEGP-UHFFFAOYSA-N	C18H30O4	0.460712	neg	8.59612e+06	77385.1	2.87875e+06	1.00735e+07
Ilexoside B	VSBDIJXQSPDVKD-UHFFFAOYSA-N	C41H64O13	0.00757672	pos	3.67361e+06	247304	2.30031e+06	1.00724e+07
Genistein	TZBJGXHYKVUXJN-UHFFFAOYSA-N	C15H10O5	2.43089	pos	4.89819e+06	5.80369e+06	8.0055e+06	1.00605e+07
Sarcodon scabrosus Depsipeptide	ZZZCVVSDKFDQJU-UHFFFAOYSA-N	C23H39N3O8	0.464344	pos	1.2142e+07	23322.3	1.18722e+06	1.00412e+07
4-Hydroxy-7,8-(methylenedioxy)-9-(6-hydroxy-1,3-benzodioxole-5-yl)naphtho[2,3-c]furan-1(3H)-one	PNHNOLIAAROUDP-UHFFFAOYSA-N	C20H12O8	0.197628	pos	4.97814e+06	459910	7.21782e+06	1.00334e+07
caulerpal B	KMSQYTBBXIHDHE-UHFFFAOYSA-N	C16H20O3	0.914942	pos	744155	6.57356e+06	3.87591e+06	1.00269e+07
Dibutyl phthalate	DOIRQSBPFJWKBE-UHFFFAOYSA-N	C16H22O4	0.442592	pos	4.27608e+07	6.3059e+06	9.08045e+06	1.00261e+07
5,7-Dihydroxy-2-heptacosylchromone	QSFMDDWYUYAUEL-UHFFFAOYSA-N	C36H60O4	1.33523	neg	0	4.78138e+06	2.93052e+06	1.00225e+07
Cacalonol	OKXRQISDRKEMCB-UHFFFAOYSA-N	C15H14O3	1.42331	pos	3.23378e+06	4.47448e+06	3.0918e+06	1.00163e+07
3,4-dihydro-6,8-dihydroxy-3,4,5-trimethyl-isocoumarin-7-carboxylic acid	VVVMDYGNIVXIIG-UHFFFAOYSA-N	C13H14O6	1.3722	neg	371771	1.16988e+06	2.18971e+06	1.00089e+07
6''-O-Malonylwistin	HOWDEROVXAADRI-UHFFFAOYSA-N	C26H26O13	1.78564	pos	4.67655e+06	31028.2	5.1697e+06	9.99711e+06
D-Arabinose 5-phosphate	PPQRONHOSHZGFQ-WDCZJNDASA-N	C5H11O8P	2.5473	pos	1.20001e+07	0	6.05581e+06	9.9872e+06
fraxinellone	WPNOWVWMZUYEQO-UHFFFAOYSA-N	C14H16O3	0.245521	neg	3.56412e+06	22600.8	4.23477e+06	9.98066e+06
caleprunifolin	GFPWLVMNIMBPFW-UHFFFAOYSA-N	C22H20O4	1.41547	pos	2.32178e+07	0	6.77859e+06	9.96897e+06
Jurubine	YEWUMIMAJWFDQG-UHFFFAOYSA-N	C33H57NO8	1.86487	neg	37586.4	7.47548e+06	5.22931e+06	9.96273e+06
Pesthetoxin	AVSUKYLMADAHPX-UHFFFAOYSA-N	C12H18O4	1.44587	pos	1.30661e+07	94488.8	5.77598e+06	9.95878e+06
6-Desacetylscilliroside	XLCCXBCMWUOBIG-UHFFFAOYSA-N	C30H42O11	1.22245	neg	5.72962e+06	0	5.28679e+06	9.94645e+06
7-megastigmen-3,6,9-triol	GSDRPXSKFIANKI-UHFFFAOYSA-N	C12H22O3	0.888859	neg	120544	2.15567e+06	2.17287e+06	9.94641e+06
h-gamma-glu-leu-oh	MYFMARDICOWMQP-UHFFFAOYSA-N	C11H20N2O5	0.29645	pos	1.16036e+07	7.2094e+06	6.04297e+06	9.90035e+06
5-(2-Aminoethyl)-3-methoxybenzene-1,2-diol	VAXRELHTGBYXIA-UHFFFAOYSA-N	C9H13NO3	3.61368	pos	839645	674671	6.34114e+06	9.88688e+06
(25S)-neospirost-4-en-3-one|(25S)-Spirost-4-en-3-on|(25S)-spirost-4-en-3-one|Diosgenone|Tamogenone	AZXZUBZBLNFUPF-UHFFFAOYSA-N	C27H40O3	0.610365	pos	9306.79	4.4389e+07	6.17505e+07	9.88488e+06
Isoflavone base + 1O, 2MeO, O-Hex	YLYJXNTZVUEFJZ-UHFFFAOYSA-N	C23H24O10	0.715202	pos	4.30927e+06	0	3.13061e+07	9.8828e+06
Cryptopyranmoscatone A3	JKIRIPQYXPLBKK-UHFFFAOYSA-N	C19H22O5	1.5165	neg	911689	0	5.11488e+06	9.86055e+06
Tubiferolide methyl ester	CLKPXYYJFFVZSE-UHFFFAOYSA-N	C31H46O4	2.85953	pos	0	2.87205e+06	6.88349e+06	9.84763e+06
javanicin W	FQRVCNACRZPBIN-UHFFFAOYSA-N	C20H30O7	1.14518	pos	2.4002e+07	0	5.49268e+06	9.84026e+06
2-methoxy-4-carbomethoxyphenyl 3beta-hydroxylup-20(29)-en-28-oate	VAOWMWFEZLPVAY-UHFFFAOYSA-N	C39H56O6	1.87905	pos	698725	1.56137e+07	1.33235e+07	9.82148e+06
Gelomulide S	YGBRRZUVVJINOK-UHFFFAOYSA-N	C24H34O8	1.39852	pos	895336	898859	9.34385e+06	9.81095e+06
2-(2-Hydroxy-aethyliden)-5-oxo-2,5-dihydro-furan-3-carbaldehyd|2-(2-hydroxy-ethyliden)-5-oxo-2,5-dihydro-furan-3-carbaldehyde	OHUSAELEYQKLFV-UHFFFAOYSA-N	C7H6O4	3.07262	neg	1.16852e+07	215315	8.32877e+06	9.80205e+06
Daibucarboline B	PLWQOMURVJHKRD-UHFFFAOYSA-N	C19H14N2O4	1.08818	pos	1.08626e+07	30152.7	4.95554e+06	9.79228e+06
4,8,13,17,21-pentamethyldocosa-4,8,12,16,20-pentaenoic acid	BJHPHCBHTOHNEI-UHFFFAOYSA-N	C27H44O2	1.77886	pos	0	5.93782e+06	6.83192e+06	9.79016e+06
8beta-hydroxy-11alpha-senecioyloxy-sandaracopimar-15-ene	NZIRCUCUDKIHHI-UHFFFAOYSA-N	C25H40O3	0.152692	pos	15455.4	6.37282e+06	3.71859e+06	9.78335e+06
Taxifolin 7-rhamnoside	HNGAZJABJOAMSW-UHFFFAOYSA-N	C21H22O11	2.95605	neg	3.75587e+06	5.37843e+06	9.3002e+06	9.78332e+06
(2S)-2,3,9,10-tetrahydro-2-[3,4-dihydro-8-(3-ethoxy-3-methylbutyl)-2,2-dimethyl-2H-chromen-6-yl]-8,8-dimethyl-4H,8H-pyrano[2,3-f]chromen-4-one|tonkinochromane E	UNATUDWGINZOAN-UHFFFAOYSA-N	C32H42O5	22.9911	pos	433531	2.25389e+08	2.53836e+07	9.77849e+06
15,16-dihydroxy-7,11-dioxopimar-8(9)-ene	HUYFJVXBSKMUTN-UHFFFAOYSA-N	C20H30O4	1.42052	pos	1.70918e+06	1.2644e+07	5.93734e+06	9.76802e+06
3-(3,4-Methylenedioxyphenyl)propenal	HZUFMSJUNLSDSZ-UPHRSURJSA-N	C10H8O3	2.55446	pos	1.60508e+06	48342.1	7.75593e+06	9.76695e+06
3-[(2,4-Dihydroxy-6-propylbenzoyl)oxy]-2-hydroxy-4-methoxy-6-propylbenzoic acid	DMDOBFFDDKYHES-UHFFFAOYSA-N	C21H24O8	0.524244	neg	0	36172.2	1.11124e+07	9.76676e+06
Skullcapflavone I 2'-(2''-E-cinnamoylglucoside)	FOWHMJBXCXWUGU-UHFFFAOYSA-N	C32H30O12	2.21236	neg	142518	123683	7.7447e+06	9.75106e+06
(4aR,5R,6R,8aR)-5-[2-(2,5-dihydro-5-oxofuran-3-yl)ethyl]-3,4,4a,5,6,7,8,8a-octahydro-6-(hydroxymethyl)-5,8a-dimethylnaphthalene-1-carboxylic acid beta-D-glucopyranosyl ester|17-hydroxycleroda-3,13-diene-15,18-dioic acid 15,16-lactone 18-beta-D-glucopyranosyl ester|caseariaside B	DJEXZSJNFUQYKX-UHFFFAOYSA-N	C26H38O10	2.7394	neg	7.16553e+06	0	5.09534e+06	9.74619e+06
(2'E)-1-hydroxy-2-(3',7'-dimethylocta-2',6'-dienyl)-4-methoxy-6-methylbenzene|1-hydroxy-2-(3',7'-dimethyl-octa-2',6'-dienyl)-4-methoxy-6-methyl-benzene|2-[(2'E)-3',7'-dimethyl-2',6'-octadienyl]-4-methoxy-6-methylphenol	XKPAGCGTQMRIAP-UHFFFAOYSA-N	C18H26O2	0.726076	pos	841096	822837	8.01619e+06	9.74369e+06
(-)-(1R,2S,6R,10S)-2alpha-acetoxyamorpha-4,7(11)-dien-8-one	BSBRAGCIPZABGI-UHFFFAOYSA-N	C17H24O3	0.897518	pos	1.11556e+06	1.83936e+06	8.87955e+06	9.7433e+06
3-hydroxybutyric acid	WHBMMWSBFZVSSR-UHFFFAOYSA-N	C4H8O3	1.66399	neg	7.07182e+06	1.05296e+07	3.33393e+06	9.7399e+06
Scrophuloside B	ZZGQWDYMANCPTP-UHFFFAOYSA-N	C24H26O10	0.675381	neg	5.39959e+06	1.59328e+07	6.16036e+06	9.73166e+06
3,4-diphenyl-5H-furan-2-one	CPBAHTZRJQATEJ-UHFFFAOYSA-N	C16H12O2	2.0567	neg	2.54743e+06	44800.1	5.01858e+06	9.72894e+06
Orcinol glucoside	YTXIGTCAQNODGD-UJPOAAIJSA-N	C13H18O7	0.080062	pos	1.15494e+06	2.38696e+07	6.36522e+06	9.72385e+06
(2Z)-2-methyl-4-[3a,4,5,7,10,11,12,13-octahydro-(5R*,16aS*)-8,17-dihydroxy-3,3,13-trimethyl-15-(3-methylbut-2-en-1-yl)-7,18-dioxo-10-(prop-1-en-2-yl)-3H,9H-1,5:9,13-dimethanofuro[3,4-g]oxocino[3,2-b]xanthen-1-yl]lbut-2-enoic acid|gambogellic acid A	CNLRVNKFKWLFJE-UHFFFAOYSA-N	C38H44O9	2.07374	neg	3053.03	1.10051e+07	8.40945e+06	9.70108e+06
2-hydroxyhexadecanoic acid	JGHSBPIZNUXPLA-UHFFFAOYSA-N	C16H32O3	1.65913	neg	235141	9.13099e+06	6.60043e+06	9.69758e+06
secohyperforin	RPDSURNYPWBNQV-UHFFFAOYSA-N	C30H44O4	1.46966	neg	0	3.19568e+06	816064	9.68731e+06
Psoracorylifol E	KYAKMCAFTRNVKQ-UHFFFAOYSA-N	C18H24O2	0.959826	pos	4.97122e+06	0	3.65162e+06	9.67993e+06
14,15,16-Trisnor-8(17)-labdene-13,19-dioic acid	UPYAPTSOOPEIMX-UHFFFAOYSA-N	C17H26O4	1.63147	pos	3.97377e+06	1.18098e+06	5.18883e+06	9.65116e+06
Murrafoline D	IXBHPXPTTQWXQG-UHFFFAOYSA-N	C32H30N2O2	0.891986	pos	3.60832e+06	523556	4.24164e+06	9.65103e+06
(3R,5aR,5bR,6R,7S,9S,11aR,12R,13bS)-icosahydro-7,9,12-trihydroxy-5a,5b,11a,13b-tetramethyl-8-methylidene-3-(prop-1-en-2-yl)-1H-cyclopenta[a]chrysen-6-yl benzoate|7beta-(benzoyloxy)-21alphaH-24-norhopa-4(23),22(29)-diene-3beta,6beta,11alpha-triol|cavalerol D	LIXFWXURYMYQRO-UHFFFAOYSA-N	C36H50O5	1.68201	pos	17467.2	1.38517e+07	1.22246e+07	9.64362e+06
methyl-2,3,5-trihydroxytetradecanoate	RMZHRCHXTBTPGS-UHFFFAOYSA-N	C15H30O5	0.878133	pos	5.03194e+06	9.84822e+06	8.0323e+06	9.63705e+06
Melcanthin A	XSZRIJMSPWSOAV-UHFFFAOYSA-N	C23H28O9	0.208375	neg	426615	362491	4.81459e+06	9.61707e+06
Epicatechin	PFTAWBLQPZVEMU-UKRRQHHQSA-N	C15H14O6	1.80342	pos	6.42919e+06	0	3.95161e+06	9.6148e+06
Methylkauran-19-ol-17-oate	DZNQMARSUVZEMD-UHFFFAOYSA-N	C21H34O3	4.15934	pos	0	1.84365e+06	9.45118e+06	9.61078e+06
Ginkgolic Acid C13-0	VEPUCZUJLKAVNM-UHFFFAOYSA-N	C20H32O3	2.56253	pos	0	0	0	9.61069e+06
Isoleucine	AGPKZVBTJJNPAG-UHFFFAOYSA-N	C6H13NO2	2.6726	pos	1.94134e+06	4.2219e+06	8.78252e+06	9.57178e+06
gamma-Glutamylaspartic acid	JTJZAUVWVBUZAU-WHFBIAKZSA-N	C9H14N2O7	0.706722	pos	30922.2	0	7.25641e+06	9.55789e+06
N-Fructosyl pyroglutamate	VMOJEEZNLOLYBG-UHFFFAOYSA-N	C11H17NO8	1.71951	neg	6.52316e+06	489863	3.67918e+06	9.52159e+06
Parthenolide	KTEXNACQROZXEV-QLIGOWBFSA-N	C15H20O3	0.316767	pos	4.77727e+06	3.2585e+07	1.68666e+07	9.49993e+06
dihydrotrichorabdal A|Rabdosichuanin B	DLDPXPARISOLCS-UHFFFAOYSA-N	C20H28O5	1.30567	neg	2.69027e+06	94742.7	5.60825e+06	9.49802e+06
Kamebakaurin	WHSUEVLJUHPROF-UHFFFAOYSA-N	C20H30O5	24.6644	neg	2.03154e+06	2.33464e+07	1.89067e+07	9.4744e+06
Acanthoside B	WEKCEGQSIIQPAQ-IRBNZIFYSA-N	C28H36O13	1.42735	pos	6.15526e+06	0	3.00019e+06	9.46506e+06
Glycitin	OZBAVEKZGSOMOJ-MIUGBVLSSA-N	C22H22O10	2.55485	pos	3.36904e+06	126259	5.2122e+06	9.4485e+06
SUBERATE	TYFQFVWCELRYAO-UHFFFAOYSA-N	C8H14O4	1.57071	pos	9.89749e+06	1.17046e+07	1.08207e+07	9.44216e+06
2-Hydroxyethyl gardenamide A	MLKFESWUFLKYRE-UHFFFAOYSA-N	C13H17NO5	1.76775	neg	8.62511e+06	8.85375e+06	8.8873e+06	9.44143e+06
CYTOSINE	OPTASPLRGRRNAP-UHFFFAOYSA-N	C4H5N3O	0.378378	pos	4.19427e+06	4.65043e+07	1.66962e+07	9.43965e+06
Juruenolid	HEXOVSVWTSCVPT-UHFFFAOYSA-N	C27H42O5	3.08089	neg	0	4.19836e+06	5.25706e+06	9.42974e+06
Vermixocin B	NUYFKDBCHFKOBT-UHFFFAOYSA-N	C23H26O7	1.12257	pos	74264.3	52839.2	1.47702e+07	9.41862e+06
(E)-2,4-dihydroxy-3-(3,7-dimethyl-2,6-octadienyl)-6-methylbenzaldehyde|3-geranylorcylaldehyde|colletorin B	SXOCWLUWTFGULD-UHFFFAOYSA-N	C18H24O3	2.12112	pos	121067	143170	4.93871e+06	9.40808e+06
Gallicynoic acid D	ABCUJZSRBYAWAE-UHFFFAOYSA-N	C18H30O4	2.73956	neg	1.04124e+06	1.81164e+06	4.95991e+06	9.4039e+06
Methoxyeugenol	FWMPKHMKIJDEMJ-UHFFFAOYSA-N	C11H14O3	1.12442	pos	3.29031e+06	1.33514e+06	3.93249e+06	9.40283e+06
physachenolide D	RGHQRULWHKEQHE-UHFFFAOYSA-N	C30H40O8	2.0635	neg	338122	197839	4.11446e+06	9.3835e+06
(15R,16S)-ent-15,16-epoxybeyeran-3-one|excoecarin E	VOVNVULYSGPWDO-UHFFFAOYSA-N	C20H30O2	0.57407	neg	0	8.63563e+06	8.79096e+06	9.38326e+06
ruscogenin 1-O-[O-alpha-L-rhamnopyranosyl-(1->2)-4,6-di-O-acetyl-beta-D-galactopyranoside]	CLADHKARXZAKJF-UHFFFAOYSA-N	C43H66O15	1.81559	neg	3.74685e+06	494054	4.54946e+06	9.38013e+06
panajaponin	BIKDUZIBFQKKLW-UHFFFAOYSA-N	C28H51NO9	1.09732	pos	0	7.97233e+06	6.00519e+06	9.37697e+06
curvularide C	BZLIDAVUQDTJQF-UHFFFAOYSA-N	C19H37NO5	0.197828	pos	17049.5	3.89605e+06	4.46886e+06	9.3601e+06
CORTICOSTERONE	OMFXVFTZEKFJBZ-UHFFFAOYSA-N	C21H30O4	1.61479	pos	86934.1	467138	5.3477e+06	9.34288e+06
Erythrophlamid|norerythrophlamide	SVMFGPCJDDIVQK-UHFFFAOYSA-N	C24H37NO6	0.577268	pos	0	2.4363e+06	5.24735e+06	9.34109e+06
plumieride	AOPMSFXOYJXDNJ-IRFSQMTFSA-N	C21H26O12	2.38547	pos	628758	0	1.06848e+07	9.33903e+06
penicillinolide A	QEJBWCWBMPNCHV-UHFFFAOYSA-N	C14H24O5	0.907812	pos	5.93085e+06	1.41412e+07	9.57856e+06	9.33706e+06
Phyllostachysin E	JJDKRSDEANKJHZ-UHFFFAOYSA-N	C20H32O5	3.40309	neg	2.43926e+06	1.11687e+06	1.18639e+06	9.33703e+06
Americanin	NTXXGPYGMQQSML-UHFFFAOYSA-N	C18H16O6	0.297421	neg	832534	399364	1.02387e+07	9.33405e+06
pearsonine	ATRRNWLGGVBVEO-UHFFFAOYSA-N	C20H30N2O5	0.758447	pos	0	1.67021e+07	1.23035e+07	9.29515e+06
Carnosic acid	QRYRORQUOLYVBU-YBMSBYLISA-N	C20H28O4	0.769747	pos	2.15014e+06	1.5872e+06	4.21693e+06	9.28781e+06
(5Z)-4-hydroxy-3-(4-hydroxyphenyl)-5-[(4-hydroxyphenyl)methylidene]furan-2-one	BNNVVTQUWNGKPH-UHFFFAOYSA-N	C17H12O5	0.667063	neg	2.27654e+07	32585.8	6.22696e+06	9.28724e+06
SCHEMBL9178747	DUQRVHURUWMFMN-UHFFFAOYSA-N	C10H18O2	2.795	neg	6.47957e+06	306545	4.35186e+06	9.27052e+06
alpha-Asarone	RKFAZBXYICVSKP-AATRIKPKSA-N	C12H16O3	1.07068	pos	236491	511441	6.11149e+06	9.25347e+06
Isorosmanol	UXVPWKDITRJELA-CLWJZODNSA-N	C20H26O5	1.18605	pos	1.37061e+07	5.10151e+06	1.37186e+06	9.25086e+06
APTENIOL A	UKCHMOVWJBXLBX-UHFFFAOYSA-N	C18H18O5	0.625348	pos	1.14245e+07	94593.8	3.03467e+06	9.23931e+06
p-Mentha-1,3,8-triene	XNMPFDIYAMOYRM-UHFFFAOYSA-N	C10H14	2.42425	pos	8.13769e+06	450151	2.95563e+06	9.23732e+06
2-formyl-4,4'-dihydroxy-3-[(4-hydroxyphenyl)ethynyl]biphene|selaginellin K	JEOSQFFBGKRGBY-UHFFFAOYSA-N	C21H14O4	2.34238	pos	6.67887e+06	783431	4.23601e+06	9.22331e+06
erythrophlesin A	IUVRPDRGRVHSDC-UHFFFAOYSA-N	C41H58O10	0.563973	pos	10210.9	998400	3.10391e+07	9.21464e+06
1-[4-hydroxy-3-(3-methylbut-2-enyl)phenyl]ethanone	QJAPFSSVKIZTMR-UHFFFAOYSA-N	C13H16O2	2.39487	pos	6.43794e+06	5.4455e+06	1.08895e+07	9.19554e+06
methylgochnatoate-17-O-phenylacetate	YWDQSLLBRGADIX-UHFFFAOYSA-N	C29H38O6	1.76325	pos	1.15816e+06	42069.9	8.68525e+06	9.18771e+06
(26S)-3-acetyl-26-O-methylperenniporiol	HHNPOSFICBKHFZ-UHFFFAOYSA-N	C35H52O6	0.117931	pos	4.33733e+06	0	2.82218e+06	9.14784e+06
hydralazine	RPTUSVTUFVMDQK-UHFFFAOYSA-N	C8H8N4	1.77744	neg	3.38908e+06	3.76369e+06	1.65043e+07	9.14394e+06
Sophoracarpan B	BARRXUGKUYTIQH-UHFFFAOYSA-N	C17H14O6	1.04606	pos	5.71967e+06	2.2303e+06	5.79841e+06	9.1227e+06
L-dianose	MXKAFWGWKGCIIB-UHFFFAOYSA-N	C8H16O4	6.09234	pos	865915	4.51017e+06	2.75109e+06	9.10011e+06
Irisoquin-E	DSAUDXYPTFRGAG-UHFFFAOYSA-N	C28H48O4	1.76062	neg	16592.8	5.7532e+06	1.54554e+06	9.09647e+06
cis- and trans-2-<pent-3-en-1-ynyl>-5-<4-hydroxybut-1-ynyl>-thiophene	ASXSXWBTTYQRGL-UHFFFAOYSA-N	C13H12OS	0.076253	pos	3.45724e+06	413288	4.5482e+06	9.09525e+06
erythro-(1,3Z,11E)-tridecatriene-7,9-diyne-5,6-diyl diacetate	QFJBBVADGQMYNI-UHFFFAOYSA-N	C17H18O2	0.400338	neg	2.63357e+06	108062	4.12811e+06	9.08697e+06
Viridene	AIELHXXAVIMENK-UHFFFAOYSA-N	C11H16	0.887497	pos	822859	117774	3.28658e+06	9.08247e+06
(R)-Salsolinol	IBRKLUSXDYATLG-UHFFFAOYSA-N	C10H13NO2	0.300574	pos	814971	790874	7.12391e+06	9.08201e+06
Isonicotinic acid	TWBYWOBDOCUKOW-UHFFFAOYSA-N	C6H5NO2	0.528754	pos	7.59702e+06	607380	1.18805e+06	9.07411e+06
osthol	MBRLOUHOWLUMFF-UHFFFAOYSA-N	C15H16O3	1.00375	pos	6.04077e+06	0	5.07591e+06	9.03064e+06
5alpha'-Hydroxy-6',7'-epoxytriptiliocoumarin	DWOGRBCRLCTXJF-UHFFFAOYSA-N	C25H30O5	1.42634	neg	503113	247977	3.39488e+06	9.01389e+06
6''-O-alpha-D-Galactopyranosylciceritol	UMROTOJYTIKHPJ-NKPCKLMGSA-N	C25H44O21	0.769944	pos	19901.7	170635	1.20425e+07	9.00579e+06
(9Z,16Z)-9,16-Octadecadiene-12,14-diynal	KBJVYYKOJNCSDO-UHFFFAOYSA-N	C18H24O	2.16796	pos	927666	0	3.10302e+06	9.00387e+06
3alpha-Hydroxycumarolycoseron	BUBPXJDSIOFMJL-UHFFFAOYSA-N	C24H30O5	0.283903	neg	0	2.81774e+06	628231	9.00271e+06
Terrestrol F	MOJQIPGXOWLFII-UHFFFAOYSA-N	C14H13ClO5	2.58001	neg	0	0	690499	8.98138e+06
Alternariol monomethylether	LCSDQFNUYFTXMT-UHFFFAOYSA-N	C15H12O5	2.13875	pos	388319	0	6.20131e+06	8.97516e+06
Grifolin monomethyl ether	OJJOUHFECGXRFJ-UHFFFAOYSA-N	C23H34O2	0.176373	pos	157519	6.81734e+06	1.37191e+07	8.97218e+06
Kankanoside D	OOKKJUJJHAYTGD-UHFFFAOYSA-N	C15H26O7	0.129887	pos	804622	9.35209e+06	7.56284e+06	8.95684e+06
Vismione C	FLYMKXSUGFPBQY-UHFFFAOYSA-N	C22H24O6	2.22642	pos	5.92353e+06	52832.3	1.9311e+06	8.9542e+06
8-O-4'-neolignan-3'-O-beta-D-glucopyranoside	ZKVRSNBRTIQMBB-UHFFFAOYSA-N	C24H32O7	1.58671	pos	724414	14571.7	1.58483e+07	8.9451e+06
6,7-Dihydro-7-isopropylidene-4-methyloxepin-2(5H)-one	ZWXWVUKJWCNMRG-UHFFFAOYSA-N	C10H14O2	3.50265	pos	5.47101e+06	735316	4.19955e+06	8.9306e+06
Terramide C	VRDPIJDRSGUDPU-UHFFFAOYSA-N	C10H18N2O4	1.30936	neg	5.12128e+06	412587	4.91126e+06	8.93034e+06
Epoxyeremopetasinorol	IDTQMVOQRHWPMV-UHFFFAOYSA-N	C13H20O3	1.52853	neg	5.39134e+06	94180.3	2.86435e+06	8.92694e+06
Cyclograndis-olid	JLQCIOOODNXJEK-UHFFFAOYSA-N	C31H48O3	1.08353	pos	0	1.45357e+07	7.10027e+06	8.92657e+06
alpha-Boswellic acid	BZXULBWGROURAF-IKNLXHIFSA-N	C30H48O3	0.255449	pos	5.40248e+06	0	1.7217e+06	8.91716e+06
ajugasterone C	RVMAVGROMRTERF-UHFFFAOYSA-N	C27H44O6	1.90882	pos	0	8.96785e+06	1.55412e+06	8.91249e+06
Icariside F2	NJMQSVWMCODQIP-UHFFFAOYSA-N	C18H26O10	0.739341	neg	0	9.425e+06	6.97713e+06	8.90329e+06
Haploperozide	LLQBCHODNVGKSF-UHFFFAOYSA-N	C28H38O17	1.27527	pos	0	1.8849e+06	1.64274e+07	8.90091e+06
DL-p-Hydroxyphenyllactic acid	JVGVDSSUAVXRDY-UHFFFAOYSA-N	C9H10O4	2.22402	neg	8.61444e+06	5.68882e+06	7.44029e+06	8.8984e+06
Glutamate	WHUUTDBJXJRKMK-UHFFFAOYSA-N	C5H9NO4	1.67235	pos	1.88033e+07	1.53525e+06	6.19876e+06	8.88901e+06
3beta-hydroxy-3-epi-fusicoccin H|fusicoccin S	ODNMXSSVWSPXRJ-UHFFFAOYSA-N	C26H42O9	0.853864	neg	64402.1	6.89826e+06	3.04441e+06	8.87084e+06
17-Succinoyloxy-ent-cleroda-3,13(16),14-trien-15,16-oxide	VMJXBULAZAIARU-UHFFFAOYSA-N	C24H34O5	0.762085	neg	4691.98	1.135e+07	1.24285e+07	8.83955e+06
Terpestacin	UTGBBPSEQPITLF-UHFFFAOYSA-N	C25H38O4	0.284692	pos	0	3.49386e+06	2.25502e+06	8.83802e+06
Ursa-9(11),12-dien-3-one	AWUHBUKNSPYYTJ-UHFFFAOYSA-N	C30H46O	0.509532	pos	3.96787e+06	0	3.82662e+06	8.83475e+06
dihydropyriculol	QCNHRELJZMEYCW-UHFFFAOYSA-N	C14H18O4	1.19353	neg	7.26466e+06	169261	4.18956e+06	8.82136e+06
Jaborosalactone Q	DWDKUUONJAYYQR-UHFFFAOYSA-N	C27H36O5	0.398663	neg	1.00509e+07	212407	1.07611e+06	8.81648e+06
azedarachol	HXGDRGSZLLBDBQ-UHFFFAOYSA-N	C25H40O5	0.981635	pos	151908	2.75494e+06	1.96844e+06	8.8122e+06
1-Epideacetylbowdensine-	BETMCQJBPVKOLI-UHFFFAOYSA-N	C17H21NO5	0.167804	pos	167427	885495	6.17139e+06	8.80702e+06
[(1R,5S,6S)-5-acetyloxy-3-(hydroxymethyl)-2-oxo-6-propan-2-ylcyclohex-3-en-1-yl] (E)-2-methylbut-2-enoate	NUENJLVLKHHYJS-UHFFFAOYSA-N	C17H24O6	1.11166	pos	5.25365e+06	95754.4	5.31333e+06	8.80479e+06
6-Gingerol	NLDDIKRKFXEWBK-AWEZNQCLSA-N	C17H26O4	1.39779	neg	1.30679e+07	6.18392e+06	8.1072e+06	8.80316e+06
SCHEMBL8658984	YNHBLISDDXOUDQ-UHFFFAOYSA-N	C12H18O2	1.00223	pos	1.19045e+06	1.18925e+06	7.55694e+06	8.78054e+06
12-acetoxy-14-(3-hydroxyisovaleryloxy)-nerolidol|12-acetoxy-14-<3-hydroxyisovaleryloxy>-nerolidol	WPUYPHIJRRIFSP-UHFFFAOYSA-N	C22H36O6	1.98067	pos	3601.52	296532	6.68612e+06	8.77509e+06
brassicicene G	CZLKIWRMFVENLG-UHFFFAOYSA-N	C21H32O5	0.0795889	neg	5.38124e+06	565653	2.88655e+06	8.77107e+06
3,5-dihydro-3-oxo-ML-236C	UXKPJFAFIVQXBC-UHFFFAOYSA-N	C18H26O4	1.76933	pos	7.46494e+06	210432	2.7405e+06	8.76543e+06
2-Propenoic acid, 3-phenyl-, methyl ester	CCRCUPLGCSFEDV-UHFFFAOYSA-N	C10H10O2	0.212647	pos	5.77015e+06	34021.2	5.2847e+06	8.76244e+06
Tournefolic acid B	QOUSSKPKMYDXFC-UHFFFAOYSA-N	C17H12O6	1.57324	neg	5.92178e+06	15634	6.91969e+06	8.76027e+06
6(S)-(6-O-acetyl-b-D-glucopyranosyloxy)octadecanoic acid	RSMOJPHNAHXCJA-UHFFFAOYSA-N	C26H48O9	3.58283	pos	38392.1	1.38298e+07	1.08856e+07	8.75205e+06
Rhaponticin	GKAJCVFOJGXVIA-DXKBKAGUSA-N	C21H24O9	0.469002	neg	68781.2	1.86182e+07	5.68983e+06	8.72807e+06
24-Hydroxyimino-29-norcycloart-3-ol	BBTKHNQTIVMKND-UHFFFAOYSA-N	C29H49NO2	0.608062	pos	0	8.55583e+06	7.78746e+06	8.71482e+06
ACMC-20lcq4	DWUVHECBKJLRHK-UHFFFAOYSA-N	C26H50O3	2.13417	neg	0	1.91873e+07	4.37724e+06	8.71188e+06
teideadiol 18-monomalonate	ABOGYMPDXGNWER-UHFFFAOYSA-N	C23H32O5	0.832288	pos	84266.3	0	6.07133e+06	8.69965e+06
2-(3,4-dihydroxyphenyl)ethyl 3-O-(6-deoxy-alpha-L-mannopyranosyl)-beta-D-glucopyranoside 4-[(2E)-3-(3,4-dihydroxyphenyl)-prop-2-enoate] 6-[(2E)-3-(4-hydroxy-3-methoxyphenyl)-prop-2-enoate]|galypumoside B	FDRZMRMXURZSAM-UHFFFAOYSA-N	C39H44O18	1.26541	pos	4.46199e+06	140747	3.49519e+06	8.69122e+06
mangostin	GNRIZKKCNOBBMO-UHFFFAOYSA-N	C24H26O6	0.335831	pos	724284	14584.4	1.60042e+07	8.68933e+06
2-ISOPROPYL-5-OXOHEXANOIC ACID	GBNBHMJSMSODSZ-UHFFFAOYSA-N	C9H16O3	1.0819	pos	816544	395341	6.5839e+06	8.68755e+06
(4R)-alpha-terpineol 8-O-beta-D-(6-O-galloyl)glucopyranoside	SGZVUALRBMIRIV-UHFFFAOYSA-N	C23H32O10	1.90196	neg	43397.3	1.18402e+07	1.28718e+07	8.68496e+06
pygmol	FTIVKFWFAQMVTF-UHFFFAOYSA-N	C14H26O3	0.246443	neg	25064.7	6.64896e+06	5.56719e+06	8.68279e+06
(2R,3S,4S,5R,6S)-2-(hydroxymethyl)-6-[4-(hydroxymethyl)-1-propan-2-ylcyclohex-3-en-1-yl]oxyoxane-3,4,5-triol	WBDMFFSFFQSHFV-MUGRSDNVSA-N	C16H28O7	0.875695	pos	0	334116	4.96907e+06	8.68079e+06
2-Naphthalenecarboxylic acid, 6-hydroxy-4,5-dimethoxy-, methyl ester	BVTQILUXDZGLAO-UHFFFAOYSA-N	C14H14O5	1.07308	neg	3.56093e+06	96006.3	5.36037e+06	8.66372e+06
Revandchinone 4	ABZUEKDPGNIZLP-UHFFFAOYSA-N	C33H48O7	0.204052	neg	0	6.70546e+06	2.33711e+07	8.6616e+06
3-Hydroxydodecanoic acid	MUCMKTPAZLSKTL-UHFFFAOYSA-N	C12H24O3	1.98025	neg	134216	4.83051e+06	7.45873e+06	8.66082e+06
(3E,4R*,5S*)-4,5-dihydro-3-[(11E)-13,14-dihydroxytetradec-11-en-1-ylidenel]-4-hydroxy-5-methylfuran-2(3H)-one|litseatrinolide B	IBIKBKNWOCUBBK-UHFFFAOYSA-N	C19H32O5	0.171286	pos	1.03143e+06	336452	5.04007e+06	8.64388e+06
1-methoxy-(9R,10S)-epoxyheptadecan-4,6-diyn-3-one|1-methoxy-(9R,10S)-epoxyheptadecan-4,6-diyne-3-one	ZBDTYWHJRWZCPN-UHFFFAOYSA-N	C18H26O3	1.9044	pos	1.13906e+06	914654	4.56415e+06	8.63999e+06
ACon1_001668	NLFUQHCGODFTIB-UHFFFAOYSA-N	C47H78N2O15	2.88701	pos	5.21144e+06	1.08048e+06	0	8.63711e+06
1-Methyl-4-(prop-1-en-2-yl)benzene	MMSLOZQEMPDGPI-UHFFFAOYSA-N	C10H12	1.01933	pos	5.83951e+06	403850	3.18173e+06	8.62858e+06
dihydro-5-(7 -hydroxy-8-tetradecenyl)-2(3h)-furanone	RAXOXVFTKUDLED-UHFFFAOYSA-N	C18H32O3	1.23076	pos	1.84293e+06	1.23922e+06	4.20588e+06	8.61748e+06
1,2-diacetylsphingosine	IJUQYYAQRYPAMG-UHFFFAOYSA-N	C22H43NO4	1.75253	pos	0	4.73834e+06	9.23802e+06	8.61536e+06
Psoracorylifol A	VLFQGDGCZKMBDA-UHFFFAOYSA-N	C18H24O3	1.59814	pos	7.43732e+06	0	2.17075e+06	8.6045e+06
Ponganone V	XNGHNFHZIWCLLJ-UHFFFAOYSA-N	C22H22O6	1.28626	neg	3.51842e+06	0	4.03285e+06	8.59285e+06
Cyclo(L-Trp-L-Trp)	DNHODRZUCGXYKU-UHFFFAOYSA-N	C22H20N4O2	2.48449	pos	1.42042e+06	2.88341e+06	4.10258e+06	8.58783e+06
ALLETHRIN	ZCVAOQKBXKSDMS-UHFFFAOYSA-N	C19H26O3	0.614387	pos	192595	785877	5.61533e+06	8.58606e+06
Vincarodine	DFVNOPYNGMIZGL-UHFFFAOYSA-N	C22H26N2O5	1.00181	pos	25842.1	160627	1.23209e+07	8.58556e+06
Sterculinine II	DTWJLKCBGPJKQZ-UHFFFAOYSA-N	C15H14N2O6	2.08615	pos	2.88243e+07	255736	3.47961e+06	8.57496e+06
d-Tocotrienol	ODADKLYLWWCHNB-QRCIITMISA-N	C27H40O2	0.123847	pos	5633.64	7.42645e+06	8.59435e+06	8.55909e+06
tetrapterol B	XKAMTTQWKUJSEX-UHFFFAOYSA-N	C25H22O4	0.634401	pos	0	74328.6	1.70321e+07	8.55731e+06
meehanine V	DKJADYHAHKLZJZ-UHFFFAOYSA-N	C34H53N3O14	0.973808	pos	0	1.16072e+07	8.15323e+06	8.55711e+06
Nicotyrine	RYFOJXFXERAMLS-UHFFFAOYSA-N	C10H10N2	2.81935	pos	1.61445e+07	8.93495e+06	5.13675e+06	8.55029e+06
1-O-acetyl-3-hexadecanone	CGLATYJYVGGWSS-UHFFFAOYSA-N	C18H34O3	1.13801	neg	247766	4.25177e+06	4.30912e+06	8.54632e+06
5'-(furan-3-yl)-4a-hydroxy-4,7-dimethylspiro[5,6,7,8a-tetrahydro-1H-naphthalene-8,3'-oxolane]-2,2'-dione	DLHZVTVUHATYAU-UHFFFAOYSA-N	C19H22O5	0.444034	pos	4.90327e+06	0	5.01332e+06	8.53642e+06
Monascusone A	RLGZZHKMYXHQLV-UHFFFAOYSA-N	C13H18O5	0.746107	pos	0	73565.5	6.56268e+06	8.49919e+06
Phaseolinic acid	VRNXAQRALVPTGJ-UHFFFAOYSA-N	C11H18O4	0.685821	neg	5.70196e+06	250097	3.8266e+06	8.49739e+06
PE(18:0/18:2(9Z,12Z))	YDTWOEYVDRKKCR-UHFFFAOYSA-N	C41H78NO8P	2.79697	pos	78501.2	1.20931e+07	1.6001e+07	8.4539e+06
1-(3,4-Dimethoxyphenyl)decan-3-one	WPGKEQMMTRTWDF-UHFFFAOYSA-N	C18H28O3	0.636362	pos	0	2.14499e+06	5.04593e+06	8.45173e+06
beta-Hydroxyisovaleric acid	AXFYFNCPONWUHW-UHFFFAOYSA-N	C5H10O3	0.385552	neg	0	7.46667e+06	6.45057e+06	8.44308e+06
2-Naphthalenecarboxylic acid, 4-(3,4-dihydroxyphenyl)-6,7-dihydroxy-, 1-carboxy-2-(3,4-dihydroxyphenyl)ethyl ester	DHZIDIIBBCIIEG-UHFFFAOYSA-N	C26H20O10	0.982512	neg	4.93142e+06	30609	3.39897e+06	8.42881e+06
β-Boswellic acid	NBGQZFQREPIKMG-PONOSELZSA-N	C30H48O3	0.892318	neg	4.72012e+06	0	942116	8.42613e+06
Queuine	WYROLENTHWJFLR-BHNWBGBOSA-N	C12H15N5O3	0.288266	pos	2.23073e+07	631547	1.20876e+07	8.41752e+06
Elliptinol	ZVEDKPGZOXEGTK-UHFFFAOYSA-N	C20H18O6	1.78799	pos	4.96385e+06	496966	3.91557e+06	8.40173e+06
xi-Anomuricine	SQMUQBYKHDACDD-UHFFFAOYSA-N	C19H23NO4	0.945972	pos	625423	0	4.32086e+06	8.38634e+06
Isoastragaloside I	HVPKALQHGQMJER-XOUPSZAESA-N	C45H72O16	3.20512	pos	0	8.83022e+06	1.69124e+07	8.37598e+06
Hynapene A	NAXMPIYZDKZMMN-UHFFFAOYSA-N	C18H28O5	0.858379	neg	5.96062e+06	1.37224e+06	2.7576e+06	8.36877e+06
8-Shogaol	LGZSMXJRMTYABD-MDZDMXLPSA-N	C19H28O3	0.0570919	pos	1.08823e+06	163898	3.70194e+06	8.36467e+06
Phenoxyacetic acid	LCPDWSOZIOUXRV-UHFFFAOYSA-N	C8H8O3	1.32895	neg	4.27787e+06	302332	5.42101e+06	8.35462e+06
4-Hydroxynonenal	JVJFIQYAHPMBBX-FNORWQNLSA-N	C9H16O2	0.551696	pos	370178	0	3.85288e+06	8.3523e+06
Diosmetin-7-O-β-D-glucopyranoside	WKUHPOMCLBLCOV-MIUGBVLSSA-N	C22H22O11	1.83676	neg	5.43756e+06	340864	6.48331e+06	8.33672e+06
5'-hydroxy-asperentin-8-methyl ether	WGJKMUHOVVKNEQ-UHFFFAOYSA-N	C17H22O6	1.27855	pos	1.11907e+07	35027.9	4.42201e+06	8.33115e+06
methyl 10-oxo-11-octadecynoate	GCYUDDVCAGNKCZ-UHFFFAOYSA-N	C19H32O3	0.555774	pos	99618.2	1.04785e+06	1.22478e+07	8.32994e+06
(20R,22R)-4beta,14alpha,20,27-tetrahydroxy-1-oxoergosta-2,5,24-trieno-26,22-lactone|(20R,22R)-4beta,14alpha,20,27-tetrahydroxy-1-oxowitha-2,5,24-trienolide|ajugin C	ZCSWEGSHHWSREX-UHFFFAOYSA-N	C28H38O7	1.92376	pos	4.75842e+06	13337.3	3.58596e+06	8.32261e+06
Bruceine A	LPZSTPCYWWRQFU-VILODJCFSA-N	C26H34O11	0.340945	pos	0	0	4.96034e+06	8.31281e+06
6,7-Dimethoxy-2-phenethylchromone	MVQOWXHYPYRBOE-UHFFFAOYSA-N	C19H18O4	0.926554	pos	3.10879e+06	16045.7	4.0243e+06	8.30959e+06
Falcarindiol 3-acetate	UZDRBZORBWOTCF-UHFFFAOYSA-N	C19H26O3	2.97637	pos	6.64963e+06	40131.5	6.84803e+06	8.30836e+06
Episyringaresinol 4'-O-β-D-glncopyranoside	WEKCEGQSIIQPAQ-FKLBZQFOSA-N	C28H36O13	0.188318	neg	5.78095e+06	253609	3.12855e+06	8.30587e+06
Lespecyrtin C1	VOGSGMTZZJCGMI-UHFFFAOYSA-N	C20H20O4	2.56404	pos	6.47907e+06	0	7.58572e+06	8.30116e+06
1,2,3-tri-O-hexanoyl-alpha-glucopyranose	GWRLDSTZVHOXAA-UHFFFAOYSA-N	C24H42O9	1.09734	neg	2.35444e+06	4.6721e+06	8.6283e+06	8.29629e+06
Meliacarpinin B	RTLVRBRPDYVKFF-UHFFFAOYSA-N	C33H44O12	0.222768	pos	3.20587e+06	0	3.25205e+06	8.28878e+06
(-)-methyl (2E)-2-[(1'R)-1'-hydroxy-2'-oxopropyl]tetradeca-2,13-dienoate|secoisolitsealiicolide B	VRUFZWKTAKCFGU-UHFFFAOYSA-N	C18H30O4	0.29243	neg	5.2927e+06	55227.5	3.58878e+06	8.27974e+06
17-Hydroxyacanthoaustralide	SUTOKLTWMNXOJT-UHFFFAOYSA-N	C20H32O5	0.804933	pos	404813	2.53393e+06	3.91178e+06	8.26249e+06
CHEMBL1995684	GXTVQAPXQFZGLW-UHFFFAOYSA-N	C19H20O5	0.198849	neg	91819.4	1.04929e+07	9.34772e+06	8.25722e+06
Daurioxoisoporphine C	YRFCNSUMOFQEFS-UHFFFAOYSA-N	C19H16N2O3	1.1587	pos	2.00004e+06	0	1.41527e+07	8.25568e+06
Maristachone C	XBTQSAVEBBVBMO-UHFFFAOYSA-N	C18H28O4	1.31604	neg	4.4668e+06	29781	3.68504e+06	8.24249e+06
Tetrachyrin	ZPJLCCRNYWMMRT-UHFFFAOYSA-N	C20H28O2	0.541254	pos	0	1.36913e+07	1.61735e+07	8.23444e+06
Kahweol	JEKMKNDURXDJAD-UHFFFAOYSA-N	C20H26O3	0.596668	pos	4.31668e+06	6.79047e+06	6.79304e+06	8.17752e+06
Umbelliferone	ORHBXUUXSCNDEV-UHFFFAOYSA-N	C9H6O3	1.29977	neg	1.47742e+07	1.28929e+06	1.81753e+06	8.17414e+06
Arborine	XVPZRKIQCKKYNE-UHFFFAOYSA-N	C16H14N2O	0.501548	pos	291929	553071	7.04418e+06	8.16744e+06
Solanapyrone E	YJHFAFJKTXEFDR-UHFFFAOYSA-N	C18H24O4	1.19325	neg	1.67632e+06	12052	2.96629e+06	8.16574e+06
Biochanin-7-O-glucoside	LFEUICHQZGNOHD-UHFFFAOYSA-N	C22H22O10	0.666474	pos	3.67267e+06	0	6.41439e+06	8.16137e+06
Neostenine	ROIHYOJMCBKEER-UHFFFAOYSA-N	C17H27NO2	0.0733793	pos	2.58646e+06	4.88276e+06	4.94805e+06	8.14723e+06
1beta,4beta-dihydroxy-8beta-acetoxy-5alphaH-eudesma-11(13)-en-12-oic acid methyl ester	VDEOYVNIVWHZLJ-UHFFFAOYSA-N	C18H28O6	0.468154	neg	2.4839e+06	40242.7	1.65162e+06	8.11466e+06
Trifolirhizin 6'-monoacetate	VSTCVIKTKRJCOT-UHFFFAOYSA-N	C24H24O11	2.51452	pos	4.40015e+06	36687.8	1.11364e+07	8.11062e+06
[3R-(3alpha,3abeta,5aalpha,7beta,9bbeta)]-3a,4,5,5a,6,7,8,9b-Octahydro-3a,7-dihydroxy-3,5a,9-trimethylnaphtho[1,2-b]furan-2(3H)-one	GGJMSNYGRXMJNL-UHFFFAOYSA-N	C15H22O4	2.36622	pos	496150	601379	6.43066e+06	8.07556e+06
methyl 6beta-hydroxy-18-acetoxy-grindelane methyl ester	SPCSGPZOUMTYFD-UHFFFAOYSA-N	C23H36O6	0.593912	pos	5.21851e+06	1.84149e+06	1.4045e+06	8.06346e+06
o-Methylpellotine	SDLPOZWCCRGUOA-UHFFFAOYSA-N	C14H21NO3	0.305769	neg	3.47692e+06	5.52962e+06	9.45496e+06	8.05954e+06
NSC692895	MIZMDSVSLSIMSC-UHFFFAOYSA-N	C33H57N3O9	2.90713	pos	0	1.23366e+08	3.06907e+07	8.05668e+06
Fevicordin A	ZFESOUVADFTZGE-UHFFFAOYSA-N	C31H42O8	0.750862	neg	7956.73	55243.7	6.83132e+06	8.04672e+06
3beta-angeloyloxy-6alpha,15-epoxy-10betaH-eremophil-7(11)-en-12,8beta-olide	MUXTXXHPWMSRDG-UHFFFAOYSA-N	C20H26O5	0.668877	pos	1.61832e+07	604362	3.87943e+06	8.03124e+06
(5S)-5-methyl-3-(13,14,19,20-tetrahydroxydotriacontyl)furan-2(5H)-one|calamistrin H	SHKWGGXZYHBGTB-UHFFFAOYSA-N	C37H70O6	2.12047	neg	0	6.5996e+06	8.69735e+06	8.02897e+06
(-)-1-Methylpropyl 1-propenyl disulfide	IOVUOUZQSDBAQN-GQCTYLIASA-N	C7H14S2	0.797283	pos	2.72769e+07	3.36528e+07	1.37078e+07	8.00759e+06
1-[O-beta-D-glucopyranosyl-(1->6)-beta-D-glucopyranosyloxy]-3-methoxy-6-methyl-9,10-anthraquinone|3-methylxanthopurpurin 6-O-methyl ether 8-O-beta-D-gentiobioside	BYQBIXFFVFHQMA-UHFFFAOYSA-N	C28H32O14	0.805992	pos	1.52234e+06	0	3.51422e+06	8.00489e+06
4-Allylpyrocatechol	FHEHIXJLCWUPCZ-UHFFFAOYSA-N	C9H10O2	0.63364	neg	6.90454e+06	0	2.79929e+06	8.00437e+06
euphoreppinol	WMPSCHGUEWDFTI-UHFFFAOYSA-N	C20H32O7	0.969643	pos	3.19636e+07	32323.6	5.90357e+06	7.99698e+06
ophiobolin E	NQDBNLQDCPWIPD-UHFFFAOYSA-N	C25H34O3	0.981521	pos	464907	5.66705e+06	1.24919e+07	7.98295e+06
Erysubin C	PFUGIXOGOGVEAA-UHFFFAOYSA-N	C17H14O5	0.320471	neg	4.28752e+06	140751	5.10333e+06	7.96386e+06
labda-7,14-dien-13(R)-ol-2-O-acetyl-alpha-L-rhamnopyranoside	IRJWZEBOFGAWIF-UHFFFAOYSA-N	C28H46O6	0.780784	neg	0	7.84443e+06	7.92063e+06	7.95224e+06
Isosakuranetin	HMUJXQRRKBLVOO-AWEZNQCLSA-N	C16H14O5	0.390388	pos	1.05289e+07	25281.8	3.01114e+06	7.95076e+06
Dimethyl malate	YSEKNCXYRGKTBJ-UHFFFAOYSA-N	C6H10O5	0.422963	pos	3.8959e+07	2.88e+07	1.30012e+07	7.95014e+06
Phloretin	VGEREEWJJVICBM-UHFFFAOYSA-N	C15H14O5	0.137647	neg	5.5111e+06	281404	7.57527e+06	7.92649e+06
Cryptocaryolone	SNUANQYZLYFQEB-UHFFFAOYSA-N	C12H20O5	1.02551	neg	6.0007e+06	302743	4.57188e+06	7.92617e+06
13,14,15,16-tetranorlabdane-8alpha,12,19-triol	OSLJXGPVHCLGHU-UHFFFAOYSA-N	C16H30O3	0.737076	neg	245888	6.82169e+06	6.38804e+06	7.92099e+06
Okaramine L	IILJSEXGGMGEMF-UHFFFAOYSA-N	C32H36N4O3	0.088852	pos	40722.7	4.25397e+06	4.35987e+06	7.90675e+06
Chondrillasterol 3-[glucosyl-(1->4)-glucoside]	TZCNBGOTFQYFAL-CMDGGOBGSA-N	C41H68O11	0.123551	pos	260007	5.15272e+06	6.01207e+06	7.90178e+06
Ligustilide	IQVQXVFMNOFTMU-FLIBITNWSA-N	C12H14O2	0.7255	pos	5.00243e+06	107008	3.86587e+06	7.88723e+06
5-hydroxy-2-(3-hydroxy-4,5-dimethoxyphenyl)-3,7-dimethoxychromen-4-one [IIN-based on: CCMSLIB00000848808]	LLDTYMGZAXZDDU-UHFFFAOYSA-N	C19H18O8	0.540545	pos	0	94791.5	7.24927e+06	7.87857e+06
14-oxo-cacalol methyl ether	SOSVPFUUQJTENT-UHFFFAOYSA-N	C16H18O3	0.846065	pos	0	1.58108e+07	1.01128e+07	7.84526e+06
nigramide K	VKHVHOSTRKKSBV-UHFFFAOYSA-N	C29H42N2O4	0.481821	pos	103284	2.04417e+06	1.25955e+06	7.84057e+06
Azacridone A	GSYTWFSUSXURDO-UHFFFAOYSA-N	C18H16N2O3	1.99027	pos	2.20641e+06	280714	1.62195e+07	7.83997e+06
15,18-Dihydroxyabieta-8,11,13-trien-7-one	DNAMQWAMMWRLBC-UHFFFAOYSA-N	C20H28O3	2.24373	neg	5.61281e+06	1.1214e+06	3.98644e+06	7.81843e+06
anti-thiobinupharidine sulphoxide	LABHUFNTQHNECT-UHFFFAOYSA-N	C26H39FN2O2S	0.300521	pos	4.94592e+06	152098	1.88148e+06	7.79928e+06
3-(2-Amino-2-carboxyethyl)benzoic acid	JANONUPBHGWOBP-UHFFFAOYSA-N	C10H11NO4	0.0541538	pos	675817	48329.3	4.65789e+06	7.79588e+06
argentinic acid E methyl ester	GLVOJAKOZRRBTG-UHFFFAOYSA-N	C42H66O10	1.76435	pos	305958	6.37012e+06	1.6542e+06	7.79153e+06
Iridin	LNQCUTNLHUQZLR-OZJWLQQPSA-N	C24H26O13	1.87995	neg	3.01331e+06	0	4.14913e+06	7.78803e+06
4-hydroxy-5-pentyloxolan-2-one	NVARDNCEKDHHJR-UHFFFAOYSA-N	C9H16O3	1.5434	neg	4.57198e+06	622493	4.52158e+06	7.78361e+06
6alpha-phenylacetoxy-4beta,5alpha-epoxygermacra-1(10)E,11-dien-8alpha,12-olide	YSSYRHZYCGIIJR-UHFFFAOYSA-N	C23H26O5	2.15786	neg	0	830009	1.97368e+06	7.77261e+06
ACMC-20md0m	WTLVYAWQAPUBFY-UHFFFAOYSA-N	C18H28O4	0.964976	neg	2.65707e+06	660067	3.32062e+06	7.77061e+06
chilianoside F	OZGIVROHGSFHCX-UHFFFAOYSA-N	C36H62O11	2.38847	neg	3.60522e+06	0	3.08396e+06	7.7521e+06
6-keto-17-acetoxy-grindelane methyl ester	PJDYLLGHZPPGCW-UHFFFAOYSA-N	C23H34O6	0.825042	pos	415516	1.70674e+07	9.67406e+06	7.7506e+06
cis-9,10-Epoxystearic acid	IMYZYCNQZDBZBQ-UHFFFAOYSA-N	C18H34O3	1.01433	neg	927125	8.79252e+06	8.00213e+06	7.74301e+06
8alpha-acetoxy-13,14,15,16-tetranorlabdan-12-oic acid-18,6alpha-olide	ILOQYDUUSAMWPH-UHFFFAOYSA-N	C18H26O6	2.22373	pos	6.67318e+06	105000	747719	7.74205e+06
Loliolide beta-D-glucopyranoside	WFNLLLYWGLKLJX-UHFFFAOYSA-N	C17H26O8	0.938138	pos	495898	0	3.67731e+06	7.73143e+06
(1R,4aS,5R,7R,7aR)-1-ethoxy-1,4a,5,6,7,7a-hexahydro-5-hydroxy-7-methylcyclopenta[c]pyran-4-carbaldehyde|incarvilleaol	WQULNIFIWNOOTN-UHFFFAOYSA-N	C12H18O4	3.04179	pos	493291	131102	4.20878e+06	7.72767e+06
trans-Ferulic acid	KSEBMYQBYZTDHS-HWKANZROSA-N	C10H10O4	2.0704	pos	3.80338e+06	2.73352e+06	3.93398e+06	7.72669e+06
Picropodophyllotoxin	YJGVMLPVUAXIQN-UHFFFAOYSA-N	C22H22O8	2.94501	pos	6.85777e+06	0	5.35688e+06	7.72271e+06
16alpha-methoxy-17-hydroxy-ent-kauran-19-al	NXFLWHAYFVCTRB-UHFFFAOYSA-N	C21H34O3	0.260227	neg	0	1.672e+07	1.21938e+07	7.71153e+06
Surinone B	GVOFTKCJGBPUCY-UHFFFAOYSA-N	C25H36O3	2.06137	pos	34960.1	8.69185e+06	7.12096e+06	7.7063e+06
20-Hydroxyecdysone 2-acetate	TXLUXHSVMYTTCI-UHFFFAOYSA-N	C29H46O8	3.43015	pos	0	0	0	7.70598e+06
Olean-12-ene-3,11-dione	XQIVDOSRZQSWFL-UHFFFAOYSA-N	C30H46O2	0.390983	pos	3.9729e+06	0	3.65116e+06	7.70238e+06
Oleanane -4H, + 2O	VNGUCOGHCJHFID-UHFFFAOYSA-N	C30H48O2	1.10289	pos	4.43009e+06	0	3.69427e+06	7.67995e+06
Penifulvin C	JDYIPAACNVDCTH-UHFFFAOYSA-N	C15H20O5	0.571597	neg	2.49667e+06	133714	3.29839e+06	7.67764e+06
Dregoside Da1	ITPJPPQJMRCTTO-UHFFFAOYSA-N	C42H70O15	0.340641	pos	3.52461e+06	370239	3.81433e+06	7.67191e+06
Formononetin 7-(6''-methylmalonylglucoside)	DQNRUSGVMUYAHO-UHFFFAOYSA-N	C26H26O12	1.82463	pos	145524	44188.7	4.9858e+06	7.66717e+06
cytochalasin F	XJJSRPWDIFDUMY-UHFFFAOYSA-N	C29H37NO6	1.56422	pos	3.77563e+06	2.46373e+07	1.17048e+07	7.65542e+06
Hexadecanedioic acid	QQHJDPROMQRDLA-UHFFFAOYSA-N	C16H30O4	1.78398	neg	138065	8.00058e+06	4.39255e+06	7.63171e+06
Nb-Desmethyl-meso-chimonanthine	GIJFCQMARBCAJG-UHFFFAOYSA-N	C21H24N4	0.827089	pos	5.10515e+06	701742	5.40931e+06	7.61299e+06
5-INDANOL	PEHSSTUGJUBZBI-UHFFFAOYSA-N	C9H10O	1.81599	pos	366969	491019	5.26248e+06	7.60848e+06
10-Isobutyryloxy-cis,cis-matricariaester|O-(3-Methylpropanoyl),Me ester-(Z,Z)-10-Hydroxy-2,8-decadiene-4,6-diynoic acid	ARJHCOWIKBCCDX-UHFFFAOYSA-N	C15H16O4	0.992563	pos	460661	340389	4.44788e+06	7.5827e+06
Camelliaside A	VNLOLXSJMINBIS-UHFFFAOYSA-N	C33H40O20	1.84761	pos	1.45553e+06	0	2.77244e+06	7.58e+06
amurenisin	MLLKYCCCVKMSMP-UHFFFAOYSA-N	C22H16O10	0.636994	pos	4.51891e+06	1.56365e+06	4.5804e+06	7.578e+06
(3R,3aR,5R,5aR,9S,11S,13bR)-3-[(2E)-erythro-4,5-dihydroxyhex-2-en-2-yl]-5,9-dihydroxy-3a-methyl-1,2,3,3a,4,5,5a,8,9,10,11,13b-dodecahydro-12H-6,11-methanocyclodeca[e]inden-12-one|erythro-11alpha-hydroxyneocyclocitrinol	UCXIVCGQGYMRDA-UHFFFAOYSA-N	C25H36O5	1.3519	pos	0	9.10378e+06	6.39416e+06	7.5689e+06
Quinone	AZQWKYJCGOJGHM-UHFFFAOYSA-N	C6H4O2	1.90987	pos	3.746e+06	2.78435e+06	4.66189e+07	7.55303e+06
methyl 4-[(E)-2-acetyl-4-oxoundec-1-enyl]-6-[(E)-prop-1-enyl]-nicotinate|monascopyridine F|Monasnicotinate C	STZHZPXESUIVNZ-UHFFFAOYSA-N	C23H31NO4	0.862297	pos	7.30659e+06	0	1.79809e+06	7.54345e+06
Resibufogenin	ATLJNLYIJOCWJE-CWMZOUAVSA-N	C24H32O4	1.21647	pos	2.67649e+06	308280	3.1205e+06	7.5337e+06
3-O-<alpha-L-arabinopyranosyl(1->2)-beta-D-glucopyranosyl>-bayogenin|3-O-[alpha-L-arabinopyranosyl(1->2)-beta-D-glucopyranosyl]-bayogenin|lobatoside A	GMTYIEUFCJJIAD-UHFFFAOYSA-N	C41H66O14	1.05922	pos	3.15557e+06	0	2.555e+06	7.50431e+06
(+/-)-threo-N-isobutyl-4,5-dihydroxy-2E-octaenamide|(??)-threo-N-Isobutyl-4,5-dihydroxy-2E-octaenamide	DVFBBRGYRFXMCJ-UHFFFAOYSA-N	C12H23NO3	2.68574	neg	1.4777e+06	52847.3	1.66472e+06	7.49175e+06
2H-Pyran-3-ol, 6-ethenyltetrahydro-2,2,6-trimethyl-, 3-acetate	IRWLDXUJBJPFNV-UHFFFAOYSA-N	C12H20O3	0.464177	pos	3.80734e+06	2.0438e+06	5.75777e+06	7.48564e+06
(-)-8-hydroxyjasmonic acid	IQGLAWZCMQYBPA-UHFFFAOYSA-N	C12H18O4	0.814639	pos	7.30518e+06	289988	6.389e+07	7.47965e+06
vibsanol	KCKHQFLIKNFJMG-UHFFFAOYSA-N	C19H18O6	2.16493	pos	3.50259e+06	22245.4	4.6561e+06	7.46784e+06
13-Carboxy-blumenol C	YLEVHHRYPWRIQH-UHFFFAOYSA-N	C13H20O4	1.78626	neg	4.34026e+06	147591	3.00227e+06	7.46588e+06
Spiradine F	HSZMQRORNAEJTB-UHFFFAOYSA-N	C24H33NO4	2.38781	neg	5.46985e+06	1.20469e+07	7.67137e+06	7.44564e+06
3-hydroxypregnane-2,16-dione	AYTMEYVBLXAHPT-UHFFFAOYSA-N	C21H32O3	0.762273	pos	0	2.37098e+06	7.54042e+06	7.43956e+06
Lucidenic acid C	XIMQDJNNBMWDIH-UHFFFAOYSA-N	C27H40O7	0.0936433	pos	9.72365e+06	26966.1	2.67461e+06	7.43836e+06
Parviflorene A	WSXCYVPTRKTYTO-UHFFFAOYSA-N	C30H32O2	0.40625	pos	7.8714e+06	322846	4.77221e+06	7.43378e+06
(3R)-(-)-7,8-dimethoxygeibalansine|(3R)-(-)-8,9-dimethoxygeibalansine	BGCOBBAEYCPRSW-UHFFFAOYSA-N	C17H21NO5	0.626347	pos	66726.4	423243	6.53149e+06	7.43362e+06
7-hydroxy-hexadeca-1,8E,14E-trien-10,12-diyne	FDFGZMGALLFLNJ-UHFFFAOYSA-N	C14H20O	1.29222	pos	4905.24	0	2.18848e+06	7.42869e+06
1,8-dimethoxypyrene-2,7-diol	GCHNQYKYNHGZKM-UHFFFAOYSA-N	C18H14O4	0.684849	pos	6.68557e+06	216460	1.93265e+06	7.41943e+06
acanmontanoside	JYGIDILRMNIZGH-UHFFFAOYSA-N	C38H44O19	1.45725	neg	2.21077e+07	0	2.60386e+06	7.40625e+06
Carnosol	XUSYGBPHQBWGAD-PJSUUKDQSA-N	C20H26O4	0.827914	neg	3.64537e+06	267818	3.78494e+06	7.38573e+06
7,4'-Dihydroxyflavone	LCAWNFIFMLXZPQ-UHFFFAOYSA-N	C15H10O4	0.542559	pos	5.78838e+06	2.26161e+06	2.63274e+07	7.38094e+06
p-Xylene	URLKBWYHVLBVBO-UHFFFAOYSA-N	C8H10	2.31578	pos	3.02495e+06	744495	4.03789e+06	7.3736e+06
Cannabigerol monoethyl ether	AEMUKTQSTGYTRH-UHFFFAOYSA-N	C23H36O2	2.7604	pos	0	6.22426e+06	1.24139e+07	7.37236e+06
KFKGGMRELGBRAF-UHFFFAOYSA-	KFKGGMRELGBRAF-UHFFFAOYSA-N	C10H14O3	0.880736	neg	741313	6.98419e+06	4.25263e+06	7.37092e+06
Mollugogenol D	QLEJDILGPWSSKZ-UHFFFAOYSA-N	C32H56O4	1.1998	neg	0	3.01936e+06	734938	7.36984e+06
Rhodomollein IX	HZWINBBXACEGLP-UHFFFAOYSA-N	C20H32O6	1.86492	pos	9.96268e+06	32537.8	2.9566e+06	7.36791e+06
THYMOL-B-D-GLUCOPYRANOSIDE	GKQGIQVSMCHAFX-UHFFFAOYSA-N	C16H24O6	0.423255	pos	946960	546213	6.44523e+06	7.35945e+06
(2R,8S,6E)-14-((5S)-2-oxo-tetrahydrofuran-5-yl)-tetradec-6-en-2,8-diol|13'R-Hydroxy-Dihydro-5-(7-hydroxy-8-tetradecenyl)-2(3H)-furanone|piliferolide C	LLUBGDHCSCOLNX-UHFFFAOYSA-N	C18H32O4	0.801577	pos	1.60964e+06	309719	4.25269e+06	7.34853e+06
(4E,2S,3R)-2-N-octadecanoyl-4-tetradecasphingenine	NCKNBDIYAHEWMH-UHFFFAOYSA-N	C32H63NO3	1.69782	pos	284420	1.08161e+07	1.62879e+06	7.3343e+06
Ethyl hexadecanoate	XIRNKXNNONJFQO-UHFFFAOYSA-N	C18H36O2	2.65269	neg	32672.9	9.4042e+06	1.23481e+07	7.33181e+06
Cornucervine	NKZJCHCKRDGVKG-UHFFFAOYSA-N	C17H29NO5	2.1395	pos	509720	55817.6	3.97877e+06	7.32218e+06
Polygoacetophenoside	ZUWXQUMKYTWEHJ-UHFFFAOYSA-N	C14H18O10	0.285952	pos	0	1.4776e+06	1.2006e+08	7.31216e+06
6,10,14-Trimethyl-2-methylenepentadecanal	PTFJEDBJXCZCDO-UHFFFAOYSA-N	C19H36O	0.0501283	pos	0	1.36877e+07	6.3841e+06	7.30687e+06
Salpichrolide M	UPOXIHOCSBWLNQ-UHFFFAOYSA-N	C28H36O6	0.411189	neg	5.37581e+06	0	3.55771e+06	7.30269e+06
Barbatusol	ZSBGZCORDLYKJB-UHFFFAOYSA-N	C20H28O2	0.769805	neg	3.90104e+06	1.25009e+06	3.5245e+06	7.30048e+06
1-(2-Hydroxy-phenyl)-hexa-2,4-diin-1-ol|1-(2-Hydroxyphenyl)-2,4-hexadiyn-1-ol|1-Hydroxy-1-(2-hydroxy-pheny)-hexa-2,4-diin|2-(1-Hydroxyhexadiin-(2,4)-yl)-phenol|2-<1-Hydroxyhexadiin-(2,4)-yl>-phenol	ATIXAFFLDCRLCX-UHFFFAOYSA-N	C12H10O2	0.122231	neg	2.71668e+06	301720	3.90398e+06	7.29843e+06
1-O-trans-cinnamoyl-beta-D-glucopyranose	CJGRGYBLAHPYOM-HOLMNUNMSA-N	C15H18O7	0.184123	pos	4.88197e+06	0	4.72426e+06	7.2899e+06
Jamesoniellide D	MCZHUUSEEWVFBJ-UHFFFAOYSA-N	C20H22O5	3.10208	pos	473551	122710	5.23584e+06	7.28383e+06
Propanoic acid 8-methyl-8-azabicyclo[3.2.1]octane-3-yl ester	NUFSBXOAMBFLRJ-UHFFFAOYSA-N	C11H19NO2	0.911597	pos	2.61473e+06	179283	4.12052e+06	7.2776e+06
Pierisformoside E	MOMFYZURGITBHF-UHFFFAOYSA-N	C26H40O9	0.264419	pos	815805	1.90193e+06	4.43694e+06	7.27277e+06
22-Deoxy-28-hydroxymakisterone C	IUHZXHYYRUEMNW-UHFFFAOYSA-N	C29H48O7	2.10313	neg	5404.19	6.5045e+06	6.72064e+06	7.26738e+06
Aflatoxin B1	OQIQSTLJSLGHID-UHFFFAOYSA-N	C17H12O6	1.26335	neg	2.0476e+06	345227	4.38878e+06	7.26238e+06
GRAYANOTOXIN 1	NXCYBYJXCJWMRY-UHFFFAOYSA-N	C22H36O7	2.59024	pos	844279	1.0484e+06	2.33568e+07	7.25512e+06
3alpha4:18,19-diepoxy-18beta,19alpha-dihydroxy-cis-cleroda-13(14)-ene-15,16-olide	CYXRMZAZBZMBSL-UHFFFAOYSA-N	C20H28O6	0.331148	pos	3.96527e+06	329427	4.26392e+06	7.22455e+06
Triptophenolide	KPXIBWGPZSPABK-FXAWDEMLSA-N	C20H24O3	0.344576	pos	0	0	5.53876e+06	7.22392e+06
Ebenone	AUDXGGMYRPKMIO-UHFFFAOYSA-N	C22H16O5	1.80197	pos	297006	1.04261e+07	3.38775e+07	7.2058e+06
atractyligenone (2-oxo-15alpha-hydroxyatractyl-16,17-ene-4alpha-carboxylic acid)	HVRVTAYCDRHBBW-UHFFFAOYSA-N	C19H26O4	2.07128	neg	2.57126e+06	34331.3	3.62664e+06	7.20096e+06
1-(3,3-Dimethyloxiranyl)-7-hydroxy-3,7-dimethyl-3,5,8-nonatrienyl ester 2-methyl-2-butenoic acid	AXUAMOWYJIVLCI-UHFFFAOYSA-N	C20H30O4	1.20211	neg	156504	7.34023e+06	2.69101e+06	7.18941e+06
guan-fu base A1	FWYGVCOTAAEFJY-UHFFFAOYSA-N	C24H31NO6	2.24023	pos	0	97462.8	2.46857e+06	7.18514e+06
trans-10,16-heptadecadien-8-ynoic acid	YABWMILQFXOECJ-UHFFFAOYSA-N	C17H26O2	0.326268	pos	278057	2.4066e+07	6.64399e+06	7.18206e+06
9-(2-Thienyl)-non-6-en-8-in-5-ol-3-on-isovalerat	LQVIXLRPXYSVEP-UHFFFAOYSA-N	C18H22O3S	0.34262	pos	0	8.18655e+06	8.69407e+06	7.17445e+06
17,23-dihydroxyspermostrychnine	DCCKZUSAIKUCMB-UHFFFAOYSA-N	C21H26N2O4	0.435582	neg	3.38379e+06	144694	2.81486e+06	7.15839e+06
octadeca-2t,9c,16t-triene-12,14-diynal	NOWARHAZBDFDNT-UHFFFAOYSA-N	C18H22O	0.179348	pos	3.91355e+06	331095	2.0301e+06	7.15123e+06
(9E)-12,15-Diacetoxybisabola-2,9-dien-7,11-diol	PWPSQCADOUKLOZ-UHFFFAOYSA-N	C19H30O6	0.500635	neg	5.62422e+06	1.57718e+06	4.63101e+06	7.14659e+06
(E)-3-(3,4-dihydroxybenzylidene)-5-(3,4-dihydroxyphenyl)dihydrofuran-2-one	UBOOMSUOPIZYEU-UHFFFAOYSA-N	C17H14O6	0.622551	neg	6.88215e+06	14860.7	5.30389e+06	7.14386e+06
(1S,4aR,6aS,6bR,10R,11R,12aR,14bS)-1,10,11-trihydroxy-2,2,6a,6b,9,9,12a-heptamethyl-1,3,4,5,6,6a,7,8,8a,10,11,12,13,14b-tetradecahydropicene-4a-carboxylic acid	XJMYUPJDAFKICJ-SEAQMCRASA-N	C30H48O5	0.612762	pos	1.46583e+06	8746.49	2.49311e+06	7.14325e+06
7-Deoxonarchinol A	YWSIMWUTQXMOSD-UHFFFAOYSA-N	C12H16O2	0.040528	pos	51213.6	450200	6.22875e+06	7.13498e+06
Knerachelin A	ICBQRENZQVXEPH-UHFFFAOYSA-N	C18H20O4	1.3448	pos	2.51947e+06	7.8713e+06	2.52363e+06	7.10194e+06
Carbazomarin A	IIRBCWLZHUJBBE-UHFFFAOYSA-N	C33H31NO7	1.54722	neg	0	7.97236e+06	7.89054e+06	7.0998e+06
Cauloside C	RROGHRHLBLVQSG-UUWFFIQNSA-N	C41H66O13	3.02082	neg	122346	0	2.07767e+06	7.06714e+06
(3beta,4beta,21beta,22alpha)-22-(acetyloxy)-3-(beta-D-glucopyranosyloxy)-23-hydroxy-21-{[(2Z)-2-methyl-1-oxobut-2-en-1-yl]oxy}-olean-12-en-28-oic acid|22-O-acetyl-21-O-angeloyl-3-O-beta-D-glucopyranosyl-24-hydroxyacerogenic acid|dipteroside E	LETLDSVJHRKCPX-UHFFFAOYSA-N	C43H66O13	0.0227031	pos	2.48105e+06	109159	2.51113e+06	7.06645e+06
Ethyl salicylate	GYCKQBWUSACYIF-UHFFFAOYSA-N	C9H10O3	0.769577	pos	475992	211857	2.13211e+06	7.05963e+06
cyclo(D-Leu-Gly-L-Phe-L-Val-Gly-S-O-Leu)	BUYZWYKJFCKQNR-UHFFFAOYSA-N	C30H45N5O7	0.532375	pos	0	7.73972e+06	7.08368e+06	7.03427e+06
bis coniferylisobutyrate	PBOGGKXMJHLCSV-UHFFFAOYSA-N	C28H38O8	2.55078	pos	4.68924e+06	55884.8	2.15025e+06	7.03302e+06
ACon1_002103	ZLACPIJRVKLLJM-UHFFFAOYSA-N	C25H28O11	1.0374	neg	0	264004	4.12496e+06	7.02874e+06
L-Leucine	ROHFNLRQFUQHCH-UHFFFAOYSA-N	C6H13NO2	3.71327	neg	1.92017e+06	8.20916e+06	5.11167e+06	7.02306e+06
Flavomentin D	TXAZFHNEWZMHQF-UHFFFAOYSA-N	C24H20O9	1.08297	pos	5.87913e+06	0	7.18898e+06	7.02239e+06
8-Deoxymerrilliortholactone	FPUYWEZSNVWNGA-UHFFFAOYSA-N	C15H24O6	1.49014	neg	3.2249e+06	252456	2.6863e+06	7.003e+06
3',4'-Dihydroxyacetophenone	UCQUAMAQHHEXGD-UHFFFAOYSA-N	C8H8O3	2.77827	pos	2.27399e+06	1.32369e+06	5.62366e+06	6.98961e+06
Azadirone	XXIKKMLIDXLAIK-UHFFFAOYSA-N	C28H36O4	1.60155	pos	336579	1.1019e+07	8.51251e+06	6.9865e+06
14beta-O-(2S,3R-nilyl)rhodomollein I	WZAGICLCYMETRE-UHFFFAOYSA-N	C25H40O8	0.0853954	pos	0	0	1.32856e+07	6.98347e+06
Anhydrofomentanol|Anhydrofomentariol	AGKPFEJSOYPXKB-UHFFFAOYSA-N	C17H14O6	1.56623	pos	154893	221480	7.58248e+06	6.98316e+06
karasamine	PEUHZLSMLRCFJM-UHFFFAOYSA-N	C23H37NO4	1.22617	neg	0	1.50945e+07	8.15738e+06	6.98033e+06
Gorlic acid	XADKGDBMULSEAC-DUXPYHPUSA-N	C18H30O2	1.0221	pos	3.31069e+06	2.99632e+06	4.41439e+06	6.97726e+06
3(R)-Benzoyloxy-2(R)-methyl-6(R)-(11'-oxododecyl)-piperidine	PBWFBFJNCUAIQQ-UHFFFAOYSA-N	C25H39NO3	2.59995	pos	0	3.89669e+06	9.00678e+06	6.96071e+06
(R)-Boschniakine	OPRAONAUWNNOOV-UHFFFAOYSA-N	C10H11NO	0.81092	pos	7.74329e+06	1.23369e+07	9.205e+06	6.95456e+06
(?)-complanadine B|complanadine B	RRPXLCVXAVGMCD-UHFFFAOYSA-N	C32H40N4O	0.568895	pos	0	1.19687e+07	1.37287e+07	6.95038e+06
Homoarecoline	UNARQANIGOBIHM-UHFFFAOYSA-N	C9H15NO2	0.14537	pos	5.07852e+06	434630	3.98945e+06	6.93103e+06
4-Allyl-2-methoxyphenyl 6-O-beta-D-apiofuranosyl-(1->6)-beta-D-glucopyranoside	PCNDZKRTANOUCK-UHFFFAOYSA-N	C21H30O11	0.142854	pos	1.46077e+06	16513.5	8.27782e+07	6.92933e+06
isofraxidin	HOEVRHHMDJKUMZ-UHFFFAOYSA-N	C11H10O5	3.05065	pos	3.17753e+06	227522	3.91836e+06	6.91374e+06
ACMC-20lyk8	KFMFKHCKPGKKNV-UHFFFAOYSA-N	C19H18O6	0.789754	neg	1.53836e+06	94975.7	2.92745e+06	6.91333e+06
Excavatin E	NYBMIJVQEQCOLI-UHFFFAOYSA-N	C19H18O6	1.99147	pos	2.35789e+06	0	3.60235e+06	6.90673e+06
3-Hydroxybenzaldehyde	IAVREABSGIHHMO-UHFFFAOYSA-N	C7H6O2	3.16873	neg	475315	2.77479e+06	3.40361e+06	6.90419e+06
3-HYDROXYTETRADECANOIC ACID	ATRNZOYKSNPPBF-UHFFFAOYSA-N	C14H28O3	0.903239	neg	140874	4.40925e+06	4.83473e+06	6.87893e+06
Mulberroside C	OHVJCFZJKPEJRL-BOWLQXBNSA-N	C24H26O9	0.956282	pos	4.4921e+06	151575	2.75532e+06	6.87274e+06
(R)-1-O-[b-D-Glucopyranosyl-(1->6)-b-D-glucopyranoside]-1,3-octanediol	ODOJEOFQPWTDSS-UHFFFAOYSA-N	C20H38O12	0.82656	pos	0	4.98528e+06	1.91926e+07	6.85808e+06
methyl 2alpha-hydroxy-3,4-dehydro-4,15-dihydrocostate	HSXFKSINGQAXAS-UHFFFAOYSA-N	C16H24O3	0.576912	pos	375585	344699	2.78807e+06	6.84855e+06
Feruloyl putrescine	SFUVCMKSYKHYLD-UHFFFAOYSA-N	C14H20N2O3	1.62322	pos	1.81125e+07	51746.4	4.8977e+06	6.82562e+06
Eupomatenoid 3	SFFQJYFGYNAPSW-UHFFFAOYSA-N	C19H16O3	2.07361	pos	9.39433e+06	0	5.69919e+06	6.80613e+06
2,4-bis(2-phenylpropan-2-yl)phenol	FMUYQRFTLHAARI-UHFFFAOYSA-N	C24H26O	1.22725	pos	604722	9.73693e+06	8.41917e+06	6.79735e+06
Hedychenone	MXTCKNHXBBXULO-UHFFFAOYSA-N	C20H26O2	1.37492	pos	2.60568e+06	1.22043e+06	4.09567e+06	6.79471e+06
1-Linoleoyl Glycerol	WECGLUPZRHILCT-UHFFFAOYSA-N	C21H38O4	1.04323	pos	123322	7.19931e+06	1.07653e+07	6.77995e+06
2-Hexyl-5-[2-(4-hydroxy-3-methoxyphenyl)ethyl]furan	WZHSIDQBPQYZNL-UHFFFAOYSA-N	C19H26O3	1.69097	pos	3.24566e+06	29468.5	2.66636e+06	6.7798e+06
COSTUNOLIDE	HRYLQFBHBWLLLL-GRFSRWIASA-N	C15H20O2	0.206748	pos	1.56665e+06	3.25311e+06	3.95622e+06	6.77658e+06
methyl ent-4-epi-agath-18-oate	YUIVXEVWYIALMF-UHFFFAOYSA-N	C21H32O4	1.8877	pos	2.13009e+06	2.97601e+06	1.46529e+06	6.76248e+06
(+-)-litsedine|11,12-dimethoxy-6,7,7a,8-tetrahydro-5H-benzo[g][1,3]dioxolo[4',5':4,5]benzo[1,2,3-de]quinoline|Litsedin|Litsedine|O-Methyl-nandigerin|O-Methylnandigerin	YYRMPJXNBYSDCA-UHFFFAOYSA-N	C19H19NO4	0.522889	pos	334091	370617	7.9936e+06	6.76099e+06
Pachyrrhizin	PENSQRMNZZWMGV-UHFFFAOYSA-N	C19H12O6	1.09874	pos	3.97976e+06	129695	3.82734e+06	6.75759e+06
embelinol	LANXOGXUPZKSRS-UHFFFAOYSA-N	C36H54O7	0.309643	pos	3.13242e+06	0	2.66706e+06	6.75492e+06
isoliquiritigenin	DXDRHHKMWQZJHT-FPYGCLRLSA-N	C15H12O4	1.78287	pos	2.60507e+06	452918	5.30706e+06	6.74424e+06
Thujyl 19-trachylobanoate	PLICBZQBAQRVRT-UHFFFAOYSA-N	C30H46O2	1.24189	pos	3.19395e+06	0	3.40366e+06	6.73979e+06
Panthenol	SNPLKNRPJHDVJA-UHFFFAOYSA-N	C9H19NO4	1.46939	pos	1.0966e+07	7.11717e+06	5.84669e+06	6.73633e+06
rac-4,6-dihydroxy-2-(2-oxoheptadecyl) benzoic acid	YHXOHSGQSCWMJB-UHFFFAOYSA-N	C24H38O5	2.34646	neg	0	3.40601e+07	8.16726e+06	6.73149e+06
Methyl N-methylanthranilate	GVOWHGSUZUUUDR-UHFFFAOYSA-N	C9H11NO2	0.166349	pos	3.13348e+06	3.06825e+07	9.67649e+06	6.68597e+06
pestalotiopamide A	UBRLOVCOJLAYPQ-UHFFFAOYSA-N	C8H13NO3	4.10154	pos	6.44509e+06	1.14116e+06	592113	6.68521e+06
NSC635113	ISNRCAHXJCTBAV-UHFFFAOYSA-N	C22H30O	0.00524805	pos	7207.74	1.21844e+07	6.67281e+06	6.67031e+06
1,6,7-trihydroxy-17-acetoxymelcantholide	DTIXDZMBHXHHCG-UHFFFAOYSA-N	C22H34O7	1.6249	neg	487016	586465	2.79106e+06	6.66735e+06
Isocochlioquinone A	CQQWSAMDCPJWPC-UHFFFAOYSA-N	C30H44O8	0.155498	neg	21100.7	6.03633e+06	3.63781e+06	6.65915e+06
Cannabisin A	CLNINZAIEQRASP-UHFFFAOYSA-N	C34H30N2O8	0.258134	pos	1.82144e+07	0	1.25751e+06	6.65126e+06
Salviamine F	PFWZZLBGBKUQMP-UHFFFAOYSA-N	C19H19NO3	2.1411	pos	3.76232e+06	30491.1	2.24614e+06	6.63652e+06
3-O-(alpha-L-rhamnopyranosyl-(1->2)-beta-D-glucopyranosyl-(1->2)-beta-D-glucopyranosyl)spergulagenic acid	UPPXMONNNGGKMB-UHFFFAOYSA-N	C48H76O19	1.57246	neg	3.82326e+06	0	2.47211e+06	6.63626e+06
Soyasaponin I methyl ester	ZEIAROWTCSYWFT-UHFFFAOYSA-N	C49H80O18	3.26967	pos	132419	24163.9	4.11279e+06	6.62872e+06
Licoricesaponin E2	ACCYCJOHUMRMMV-UHFFFAOYSA-N	C42H60O16	1.04982	pos	0	8.58498e+06	9.2676e+06	6.62421e+06
2,3-dicarboxy-6,7-dihydroxy-1-(3',4'-dihydroxy)-phenyl-1,2-dihydronaphthalene-10-methyl ester	AVJRJNWOJPUZBH-UHFFFAOYSA-N	C19H16O8	0.59838	neg	1.19938e+06	200947	6.28157e+06	6.62302e+06
2-O-acetyl-3'-O-hexanoyl-3,4-di-O-isobutyrylsucrose	BIQHVXBAECXWAX-UHFFFAOYSA-N	C28H46O15	1.39027	pos	0	854204	1.04767e+06	6.62103e+06
gamma-Glutamylvaline	AQAKHZVPOOGUCK-XPUUQOCRSA-N	C10H18N2O5	0.411396	pos	1.08775e+07	1.20105e+06	1.43595e+07	6.60098e+06
Solandelactone E	ZMCHHZFBGBLCJE-UHFFFAOYSA-N	C22H34O4	0.0885272	pos	11773.9	2.1572e+06	7.14206e+06	6.58161e+06
8alpha-<2-methylbutanoyloxy>-4beta,5alpha-epoxy-trans-germacra-1(10)-en-12,6beta-olide	CTGZTWRVWWXORU-UHFFFAOYSA-N	C20H28O5	0.230587	pos	5.60368e+06	123095	2.70181e+06	6.57959e+06
Rinderine	SFVVQRJOGUKCEG-ZRQNBYAXSA-N	C15H25NO5	1.5627	pos	3.47384e+06	3.19076e+06	3.07851e+06	6.57073e+06
14-Deoxyandrographolide	GVRNTWSGBWPJGS-YSDSKTICSA-N	C20H30O4	1.21171	pos	1.29094e+06	5.93564e+06	5.03161e+06	6.56486e+06
Isomonospermoside	DYRDBDVHLCRXAE-UHFFFAOYSA-N	C21H22O10	0.872287	neg	2.38621e+06	8.31797e+06	4.41854e+06	6.56368e+06
Ricinoleic acid	WBHHMMIMDMUBKC-XFXZXTDPSA-N	C18H34O3	1.77375	neg	258697	8.95153e+06	1.01465e+07	6.55368e+06
3-ethylidene-1H-indol-2-one	OXFIOEDMLFSOAN-UHFFFAOYSA-N	C10H9NO	1.59003	pos	1.9329e+06	1.73309e+07	2.03955e+06	6.54531e+06
Flavone base + 3O, 1MeO, O-MalonylHex	PLQBKZOSLQNLOX-UHFFFAOYSA-N	C25H24O14	0.725574	pos	4.017e+06	11931.2	2.85595e+06	6.54413e+06
Polygodial	AZJUJOFIHHNCSV-KCQAQPDRSA-N	C15H22O2	0.433755	pos	390021	447718	3.27071e+06	6.53992e+06
Hemistriterpene ether	IGAPWVIPWKTYDA-UHFFFAOYSA-N	C30H50O	0.176525	pos	0	3.77277e+06	3.26368e+06	6.53855e+06
(20R,22R)-5beta,6beta:12alpha,21-diepoxy-12beta-methoxy-17beta-hydroxy-1-oxowitha-2,24-dien-26,22-olide|12-O-methyljaborosalactone 38	HUDQCGDJEFJNAU-UHFFFAOYSA-N	C29H38O7	0.61422	neg	35773.7	942792	3.70217e+06	6.52103e+06
(2S)-5,7,5'-trihydroxyflavanone 2'-O-beta-D-glucopyranosyl-(1->3)-alpha-L-2-O-acetylrhamnopyranoside	QLBVBCPJNCEFDN-UHFFFAOYSA-N	C29H34O16	0.0493374	neg	6.17029e+06	0	1.40419e+06	6.51831e+06
Cycloaraloside F	YRRJXVAUNQTHBA-UHFFFAOYSA-N	C47H78O19	2.69536	neg	4.26345e+06	8291.18	2.37495e+06	6.51682e+06
[3aS-(3aalpha,7alpha,7abeta,8abeta,8balpha,8cbeta)]-2,3,3a,4,5,7,7a,8a,8b,8c-Decahydro-6,8a-dimethyl-3-methylene-2-oxooxireno[2,3]azuleno[4,5-b]furan-7-yl ester 2-methyl-2-propenoic acid	DVCUGTJISUVHTF-UHFFFAOYSA-N	C19H22O5	3.26827	pos	3.97594e+06	443834	3.60563e+06	6.51262e+06
Phomopsichalasin	AEKBQYOSHUYACR-UHFFFAOYSA-N	C32H41NO4	1.86491	neg	0	6.90561e+06	6.07945e+06	6.50273e+06
Variecolorin H	AULFXBHXEZPTRY-UHFFFAOYSA-N	C20H23N3O3	0.434408	pos	720467	37129.1	5.51439e+06	6.49244e+06
3-(2-Hydroxy-4-methoxyphenyl)-3,4-dihydro-2H-1-benzopyran-4,7-diol	YZBBUYKPTHDZHF-UHFFFAOYSA-N	C16H16O5	1.01177	neg	2.35961e+06	5508.47	5.10387e+06	6.48131e+06
18-bromo-(5E,17E)-octadeca-5,17-diene-15-ynoic acid methyl ester|methyl ester of 18-bromo-(5E,17E)-octadeca-5,7-diene-15-ynoic acid	RJHPNNYGRMJAPM-UHFFFAOYSA-N	C19H29BrO2	26.3758	pos	2.81209e+06	1.66949e+06	2.46965e+06	6.47079e+06
threo-2'',3''-dihydroxyechiumine	JRIDDIGGYCXEIK-UHFFFAOYSA-N	C20H33NO8	0.143668	neg	6.97763e+06	0	2.75766e+06	6.44705e+06
Euscaphic acid	OXVUXGFZHDKYLS-QUFHAEKXSA-N	C30H48O5	1.37844	pos	2.64561e+06	727284	2.74132e+06	6.43482e+06
Haematopodin	GTVMGUBGOSWMOJ-UHFFFAOYSA-N	C13H12N2O3	2.48783	pos	5.97281e+06	301328	3.01532e+06	6.43408e+06
Bufalin	QEEBRPGZBVVINN-UHFFFAOYSA-N	C24H34O4	2.27112	pos	19134.4	588251	1.91323e+06	6.43334e+06
Desoxyrhaponticin	MFMQRDLLSRLUJY-UHFFFAOYSA-N	C21H24O8	1.36231	pos	66581.8	0	9.69899e+06	6.42732e+06
Oxolobaric acid	MWCXCMJYRLNDGU-UHFFFAOYSA-N	C25H26O9	1.77553	neg	6.13911e+06	1.2167e+06	2.27609e+06	6.42579e+06
3-(2-Furanyl)-2-propenal	VZIRCHXYMBFNFD-IWQZZHSRSA-N	C7H6O2	2.57166	pos	4.9265e+06	4.65536e+06	9.85152e+06	6.41543e+06
3'-Methoxypuerarin	HQQUZVFMUSCUJS-PGPONNFDSA-N	C22H22O10	0.672267	neg	4.48456e+06	225275	2.90117e+06	6.41527e+06
Hypophaone	AWVIAOSFCBYNOR-UHFFFAOYSA-N	C19H20O6	0.230784	pos	3.75618e+06	132808	3.01322e+06	6.41049e+06
(+)-lyoniresinol-3alpha-O-beta-glucoside	FKUXFLUNGWSGIY-UHFFFAOYSA-N	C27H36O13	1.03009	neg	460177	0	2.40563e+06	6.40365e+06
N-[(4E,8E)-1,3-dihydroxyoctadeca-4,8-dien-2-yl]hexadecanamide	GMWIWVUTMCBDSP-RTXSCNSFSA-N	C34H65NO3	0.955106	pos	292562	1.40349e+07	2.31848e+07	6.40315e+06
visclerodol acid	JFCPPPHVVNHFMB-UHFFFAOYSA-N	C24H40O7	1.8469	pos	0	239198	3.29444e+06	6.3931e+06
Dumetorine	JFFVCKNYHMIHTF-UHFFFAOYSA-N	C13H21NO2	0.628983	pos	3.57778e+06	0	1.78796e+06	6.3853e+06
glyptopetolide	NIBNZFYWFTYEOH-UHFFFAOYSA-N	C30H46O2	1.10827	pos	6.84774e+06	0	2.63361e+06	6.38334e+06
virgaurol C	DASNIXBCYXERSH-UHFFFAOYSA-N	C30H42O6	7.83725	neg	0	3.85401e+06	6.04191e+06	6.37875e+06
13S-Preperegrinine	APJLGTWXFWPNFV-UHFFFAOYSA-N	C20H26O5	3.43018	pos	4.4577e+06	1.12197e+06	2.5608e+07	6.35978e+06
Avocadyne 4-acetate	FHGZOCAZNHYWAL-UHFFFAOYSA-N	C19H34O4	0.0163	neg	926403	8.3189e+06	7.03375e+06	6.34481e+06
javeroic acid	IHPQSEQTJKDJKV-UHFFFAOYSA-N	C24H36O4	0.0113925	pos	52951.3	2.74858e+07	1.02112e+07	6.34462e+06
Aflatoxin G1	YSUCHUGGULCMTR-UHFFFAOYSA-N	C18H14O7	0.383185	pos	4.00232e+06	541261	1.56893e+07	6.34272e+06
CHEMBL1834753	ZFQBRSSPULXABF-UHFFFAOYSA-N	C32H26O12	9.02359	neg	3.62755e+07	0	4.82542e+06	6.32012e+06
2,6,2',4'-tetrahydroxy-6'-methoxychalcone	XFUBPGKNMBCAHX-UHFFFAOYSA-N	C16H14O6	2.38539	pos	3.88313e+06	48199.2	3.4028e+06	6.31928e+06
Leptosin	NXOKVARAWXQHGX-UHFFFAOYSA-N	C22H22O11	2.18808	pos	2.5966e+06	0	2.47622e+06	6.31276e+06
20S,25-epoxy-3beta,23beta,24beta,-trihydroxydammaran-21-oic acid 3-O-beta-D-glucopyranosyl(1->2)-beta-D-glucopyranoside|gentirigeoside E	VRJXPIOFTJEYMJ-UHFFFAOYSA-N	C42H70O16	1.02626	neg	3.93994e+06	0	2.46881e+06	6.31202e+06
octanordammarane	VKBQNDASXFVXJJ-UHFFFAOYSA-N	C22H38	2.51454	pos	0	2.02308e+06	5.25649e+06	6.31117e+06
Glabranin	DAWSYIQAGQMLFS-SFHVURJKSA-N	C20H20O4	0.296778	neg	559415	2.87201e+06	1.83075e+07	6.30504e+06
decaturin A	SDTZNNOXVFJOFR-UHFFFAOYSA-N	C30H35NO6	1.05354	pos	56584.1	3.14489e+06	4.27714e+06	6.29797e+06
Byakangelicin	PKRPFNXROFUNDE-LLVKDONJSA-N	C17H18O7	1.12076	pos	1.31507e+07	1.33873e+06	2.9304e+06	6.29068e+06
sarmentol A 9-O-beta-D-xylopyranoside|sedumoside A4	FSMSNKQMSSKYBN-UHFFFAOYSA-N	C18H34O7	0.00030348	neg	5.49081e+06	65265.1	2.52448e+06	6.28273e+06
VITEXDOIN C	TWPBLWBNALQAFO-UHFFFAOYSA-N	C19H16O5	1.0085	pos	2.13269e+06	8647.91	1.73008e+06	6.28153e+06
Hynapene C	NUIMPRVESYOKAD-UHFFFAOYSA-N	C18H24O3	0.976796	neg	2.66446e+06	80893.5	3.24025e+06	6.27978e+06
(+/-)-trans-3-(4-hydroxy-3-methoxyphenyl)-4-[(E)-3,4-dimethoxystyryl]cyclohex-1-ene	NNDAWFGRMQFDQC-UHFFFAOYSA-N	C23H26O4	0.273027	neg	84006.1	3.69453e+06	6.80692e+06	6.27646e+06
Neocyclocitrinol D	HDGOYEAHQQCXLC-UHFFFAOYSA-N	C25H36O4	2.43156	pos	47018.5	4.9864e+06	6.0962e+06	6.27487e+06
2,3-dehydrojaborosalactol M	IRLUDYODCCYSBX-UHFFFAOYSA-N	C28H40O7	4.31642	neg	4.25046e+06	0	2.80377e+06	6.26925e+06
Perillartine	XCOJIVIDDFTHGB-UHFFFAOYSA-N	C10H15NO	0.437872	pos	5.13959e+06	435239	3.92771e+06	6.26277e+06
lycojaponicuminA	WGVQKABRYXBLGW-UHFFFAOYSA-N	C16H21NO4	0.446676	pos	3.19097e+06	146816	3.7121e+06	6.26023e+06
Methyl-imbricatoloat	RBLSXVITVQCZSU-UHFFFAOYSA-N	C21H36O3	2.43488	pos	12342.6	7.41862e+06	9.55777e+06	6.26007e+06
5beta-hydroxy-4,9-oxidogermacr-11alpha-H,13-6,12-olide	YFQRESLNQCVIHZ-UHFFFAOYSA-N	C15H24O4	1.17312	pos	1.23268e+07	54192.6	1.35653e+06	6.24769e+06
Aristelegone D	DSXFEBWYDMBLBH-UHFFFAOYSA-N	C13H18O3	1.49144	pos	346267	3.18414e+06	4.11533e+06	6.24171e+06
Guajadial	NSFVENNIBGTQJE-UHFFFAOYSA-N	C30H34O5	1.34334	pos	141759	4.68708e+06	118104	6.23523e+06
(16S,23S)-16,23-epoxycycloart-24-en-3-one|3-Ketone-16,23-Epoxycycloart-24-en-3-ol	JIFKNMPAFUZVMR-UHFFFAOYSA-N	C30H46O2	1.69633	pos	2.44247e+06	0	2.69562e+06	6.23302e+06
Xanthohumol	ORXQGKIUCDPEAJ-YRNVUSSQSA-N	C21H22O5	1.98833	pos	0	0	2.23674e+06	6.21841e+06
3-hydroxyhexadecanoic acid	CBWALJHXHCJYTE-UHFFFAOYSA-N	C16H32O3	1.44208	neg	429441	5.36338e+06	6.05686e+06	6.20282e+06
Momordicoside L	BOHOBTRHAFBJOW-MDWZMJQESA-N	C36H58O9	2.76777	pos	2.80644e+06	96985.1	2.39661e+06	6.20106e+06
4-hydroxy-6[4-hydroxystyryl]2-pyrone	ORVQWHLMVLOZPX-UHFFFAOYSA-N	C13H10O4	0.0360692	neg	2.12693e+06	164032	3.20574e+06	6.19941e+06
5''-O-trans-feruloyl-6'-O-beta-D-apiofuranosylcalleryanin	RIZNNSSMUSAGHA-UHFFFAOYSA-N	C28H34O15	0.198453	neg	9.65445e+06	0	2.24431e+06	6.18885e+06
Muscomin	PGCPWPPPMWXCMG-UHFFFAOYSA-N	C18H18O7	0.288115	neg	277878	0	1.18249e+07	6.18475e+06
Myrsinionoside C	SWEFBSBXBXTOAX-UHFFFAOYSA-N	C19H36O7	1.13787	neg	1.51951e+06	0	4.49872e+06	6.18404e+06
4-Hydroxy-3-(3'-methyl-4'-oxo-2'(E)-butenyl)acetophenon|4-Hydroxy-3-<3'-methyl-4'-oxo-2'(E)-butenyl>acetophenon|Artemispermal	ZDMKUBRRBGKXQT-UHFFFAOYSA-N	C13H14O3	1.19006	pos	5.34707e+06	226748	3.77609e+06	6.18237e+06
Lolitrem N	GIHSQRKLXKCZNX-UHFFFAOYSA-N	C37H49NO7	1.4871	neg	0	1.93012e+07	9.51629e+06	6.16611e+06
solidagoic acid E	KRHQWEZBTHQNAB-UHFFFAOYSA-N	C20H28O5	0.209486	pos	4.44674e+06	0	2.56645e+06	6.13118e+06
12-(dehydrocacalohastin-14-yl)-cacalol	ZKNMDRBVWSTTNR-UHFFFAOYSA-N	C31H32O4	0.352143	pos	0	0	3.45496e+06	6.11553e+06
2-Furanacetic acid, tetrahydro-5-tetradecyl-, methyl ester	YGQMDFMXPBTIRS-UHFFFAOYSA-N	C21H40O3	0.721276	pos	378846	9.02873e+06	7.88507e+06	6.11083e+06
2,3-Dihydro-7-hydroxy-2R*,3R*-dimethyl-2-[4,8-dimethyl-3(E),7-nonadienyl]-furo[3,2-c]coumarin	OLRXRLGFFNYRIM-UHFFFAOYSA-N	C24H30O4	1.31904	pos	0	2.93088e+06	2.67081e+06	6.10489e+06
3-[(3,4-Di-O-acetyl-6-deoxy-alpha-L-mannopyranosyl)oxy]-5,7-dihydroxy-2-(3,4,5-trihydroxyphenyl)-4H-1-benzopyran-4-one	HIVURPVQOPPNFN-UHFFFAOYSA-N	C25H24O14	1.00927	pos	3.80354e+06	8382.23	2.74602e+06	6.10203e+06
Cortodoxone	WHBHBVVOGNECLV-OBQKJFGGSA-N	C21H30O4	3.04693	pos	4.54319e+06	1.84764e+06	3.2405e+06	6.09509e+06
3-O-beta-D-allopyranosyl-7beta,25-dihydroxycucurbita-5,23(E)-dien-19-al|7beta,25-dihydroxycucurbita-5,23(E)-dien-19-al 3-O-beta-D-allopyranosyl	PRZSJOSZIIULLH-UHFFFAOYSA-N	C36H58O9	1.44179	pos	2.84824e+06	31649.8	2.03128e+06	6.09333e+06
Disynaphiolide	WYDULPNJVRDGAT-UHFFFAOYSA-N	C20H20O7	0.825563	neg	2.23028e+06	53863.1	2.7787e+06	6.08073e+06
(2S,3R,5R,9R,10R,13R,14S,17S)-17-[(2R,3R)-2,3-dihydroxy-6-methylheptan-2-yl]-2,3,14-trihydroxy-10,13-dimethyl-2,3,4,5,9,11,12,15,16,17-decahydro-1H-cyclopenta[a]phenanthren-6-one	PJYYBCXMCWDUAZ-UHFFFAOYSA-N	C27H44O6	0.260304	neg	0	9.56365e+06	3.74851e+06	6.08068e+06
(R)-Roemerine	JCTYWRARKVGOBK-UHFFFAOYSA-N	C18H17NO2	1.6579	pos	698640	11624.5	2.69827e+06	6.07209e+06
(+)-4,5-Didehydrojasmonic acid	KJWUKJXAYNQYSS-UHFFFAOYSA-N	C12H16O3	0.698006	pos	4.39696e+06	261775	3.24058e+06	6.06094e+06
2,3,5-trimethylcyclopent-2-en-1-one	HNZWNWPTJZTRTK-UHFFFAOYSA-N	C8H12O	1.2781	pos	4.56031e+06	1.53877e+06	3.36198e+06	6.05562e+06
(4S,5S,6S,8S,9S,10R,13R,14S,16S,17Z)-6,16-diacetoxy-25-hydroxy-3,7-dioxo-29-nordammara-1,17(20)-dien-21-oic acid	WLRJWQXWJBEULT-UHFFFAOYSA-N	C33H46O9	0.519554	neg	0	1.34886e+07	7.6031e+06	6.05083e+06
Campholenic aldehyde	OGCGGWYLHSJRFY-UHFFFAOYSA-N	C10H16O	0.848493	pos	9.04815e+06	8.4441e+06	8.21848e+06	6.04863e+06
Aromadendrin	PADQINQHPQKXNL-LSDHHAIUSA-N	C15H12O6	8.59815	neg	1.99483e+06	9.61441e+06	2.37094e+06	6.04734e+06
Astragaluquinone	ZPNCZRGNATWPGL-UHFFFAOYSA-N	C17H16O6	17.3035	pos	3.15404e+06	1.29949e+06	2.82996e+06	6.04659e+06
Picroroside B	IKXQFQNHWKQJOI-UHFFFAOYSA-N	C32H36O15	0.687526	pos	5.5311e+06	162557	1.43553e+06	6.04278e+06
(2Z,6E,10E)-12-hydroxy-6,10-dimethyl-2-(4-methylpent-3-enyl)dodeca-2,6,10-trienoic acid [IIN-based on: CCMSLIB00000846288]	USXGDFAHMRCBBX-AGZUIYMTSA-N	C20H32O3	0.834063	pos	26868.8	3.08078e+06	2.94078e+06	6.04114e+06
3,8-Dimethyl-1-azulenecarbaldehyde	FUYQZVHTGPRRKD-UHFFFAOYSA-N	C13H12O	2.36877	pos	2.43312e+06	6.41243e+06	2.73382e+06	6.03176e+06
N-[3-(2,3,4,9-Tetrahydro-1H-b-carbolin-1-yl)-propyl]-guanidine	NMPAXZOTIQZCEM-UHFFFAOYSA-N	C15H21N5	0.0746175	pos	927226	998974	4.06913e+06	6.02994e+06
CETRIMONIUM	RLGQACBPNDBWTB-UHFFFAOYSA-N	C19H42N+	1.00879	pos	644601	0	209000	6.01882e+06
(4aR)-10c-Acetoxy-2.2.4ar.6at.6bc.9.9.12ac-octamethyl-(8atH.12btH)-Delta13.14a-octadecahydro-picen|3-Ac-3beta-11,13(18)-Oleanadien-3-ol|3beta-Acetoxy-oleana-11,13(18)-dien|3beta-acetoxy-oleana-11,13(18)-diene|3beta-Acetoxyolean-11,13(18)-diene|3beta-acetoxyolean-11,13-diene|Olean-11,13(18)-diene-3??-yl acetate|oleana-11,13(18)-dien-3beta-yl acetate|Oleana-11,13(18)-dienyl-3beta-acetat|oleana-11:1…	HDOAIBGODBKXKL-UHFFFAOYSA-N	C32H50O2	1.43869	pos	0	0	189069	6.00806e+06
methyl 10-hydroxy-3,7,11-trimethyldodeca-2,6,11-trienoate	XCDIUVKHQADBDV-UHFFFAOYSA-N	C16H26O3	0.0255871	pos	98799.9	59275.6	2.75308e+06	6.00763e+06
Methyl linolenate	DVWSXZIHSUZZKJ-YSTUJMKBSA-N	C19H32O2	1.86512	pos	141547	1.25276e+06	1.79032e+07	6.00517e+06
(S)-11,12,13-Trinor-7-calamenone	SQESYXTWWGWCFK-UHFFFAOYSA-N	C12H14O	1.7706	pos	565567	582999	4.11349e+06	5.99126e+06
3-epi-4''-oxo-5''-desoxyprovincialin	ZFVGTXODOWBDDT-UHFFFAOYSA-N	C27H32O10	0.282299	neg	43678.5	4.68688e+06	4.8834e+06	5.9867e+06
12beta-hydroxycoroglaucigenin	HTBPPXIZDUWCFX-UHFFFAOYSA-N	C23H34O6	0.264433	pos	359138	8.70062e+06	9.5417e+06	5.98377e+06
Rengyoside A	ZVHXRQYGDOHSKK-UHFFFAOYSA-N	C14H26O8	0.414493	neg	2.73321e+06	22683.9	2.69928e+06	5.96719e+06
Calabaxanthone	PLKQPRRVFTZBAE-UHFFFAOYSA-N	C24H24O5	1.56063	pos	75943.3	1.16333e+06	1.0411e+07	5.9605e+06
Botrylactone	AMZPOLFWIKSMLX-UHFFFAOYSA-N	C14H22O5	1.91849	neg	5.67956e+06	37342.4	872171	5.95267e+06
5,7-dihydroxy-2-phenyl-6-[3,4,5-trihydroxy-6-(hydroxymethyl)oxan-2-yl]-8-(3,4,5-trihydroxyoxan-2-yl)chromen-4-one	ZGVGUTOTMNVHSX-UHFFFAOYSA-N	C26H28O13	1.28915	pos	0	54655.6	4.10981e+06	5.94326e+06
7-(5-hydroxy-3,7-dimethylocta-2,6-dienyloxy)-chromen-2-one	VNADFOGBKXRWGC-UHFFFAOYSA-N	C19H22O4	1.36052	pos	1.95065e+06	764811	3.09491e+06	5.94027e+06
gracicleistanthoside	SHXCRZBGPNESNC-UHFFFAOYSA-N	C14H19NO7	1.29553	pos	6.17882e+06	464168	2.71212e+06	5.93882e+06
6-Deoxyfagomine	RMJCALHKIHCSMY-UHFFFAOYSA-N	C6H13NO2	3.54692	neg	2.40962e+06	514726	4.42628e+06	5.93193e+06
Obamegine	XGEAUXVPBXUBKN-WUFINQPMSA-N	C36H38N2O6	1.38553	pos	0	7.95663e+06	7.2493e+06	5.9251e+06
Mussaenin C	RXWSBWAEIRXXDN-UHFFFAOYSA-N	C11H18O4	1.31217	pos	957471	268146	4.01668e+06	5.92259e+06
elaeodendroside N	NRIAMJZZTJCQCY-UHFFFAOYSA-N	C29H36O10	1.7508	pos	3.98293e+06	90857.7	1.6616e+06	5.91503e+06
NSC342981	LKYABSOYLMWGQR-UHFFFAOYSA-N	C42H68O13	2.91771	pos	3.06086e+06	94673.9	2.61366e+06	5.90912e+06
SCHEMBL2761229	GFBJXFMJWQHQJC-UHFFFAOYSA-N	C21H38O4	1.85105	pos	9671.66	4.75705e+06	5.92802e+06	5.90111e+06
(6,7-Dimethoxy-1H-isochromen-3-yl)-(2,4-dimethoxy-phenyl)-keton|(6,7-dimethoxy-1H-isochromen-3-yl)-(2,4-dimethoxy-phenyl)-ketone|(6,7-dimethoxy-1H-isochromen-3-yl)-(2,4-dimethoxy-phenyl)-methanone|2',4,4',5-tetra-O-methylcarnein|Tetra-Me ether-Peltochalcone	QILGYKLDMADCHK-UHFFFAOYSA-N	C20H20O6	2.3105	pos	4.23819e+06	0	5.65602e+06	5.88736e+06
2,4-Quinolinediol	HDHQZCHIXUUSMK-UHFFFAOYSA-N	C9H7NO2	0.0605625	pos	5.47728e+06	5.81812e+06	5.86387e+06	5.871e+06
2'-Hydroxy-4',6'-dimethoxy-3'-prenylchalcone|Ovalichalcone	QDSRQILTOUZIGL-UHFFFAOYSA-N	C22H24O4	1.26167	neg	955211	4.47806e+06	3.85265e+06	5.87091e+06
Kaempferol 3-apiosyl-(1->2)-alpha-L-arabinofuranoside-7-rhamnoside	CZZJPZMXCROXOH-UHFFFAOYSA-N	C31H36O18	1.50711	neg	7.43098e+06	0	1.91829e+06	5.8674e+06
Z-Pinnatifidienyne	YRKKCZPTQMMTEN-UHFFFAOYSA-N	C16H22BrClO	0.617047	neg	4.80021e+06	904493	3.56886e+06	5.86184e+06
L-homoserine	UKAUYVFTDYCKQA-VKHMYHEASA-N	C4H9NO3	2.76911	pos	3.1113e+07	3.1522e+06	3.93714e+06	5.85089e+06
Syringinoside	ZCKITOSCNKNMMO-UHFFFAOYSA-N	C23H34O14	0.339085	pos	6.61801e+06	254718	4.71828e+06	5.84672e+06
[3S-(3alpha,3aalpha,5aalpha,6alpha,8beta,9beta,9aalpha,9bbeta)]-Decahydro-6,8,9-trihydroxy-3,5a,9-trimethylnaphtho[1,2-b]furan-2(3H)-one	PQCKIAITDYKYFQ-UHFFFAOYSA-N	C15H24O5	0.333564	neg	3.52524e+06	67287	2.85839e+06	5.84149e+06
Ptychanolide	HAOKVWMBCLCRQJ-UHFFFAOYSA-N	C15H22O3	0.704297	pos	254435	6.50149e+06	3.44546e+06	5.83e+06
Cyclopassifloic acid C	MXCWXDOOLGFUMA-UHFFFAOYSA-N	C31H52O7	3.46979	pos	0	0	1.86101e+06	5.82428e+06
3beta-hydroxy-(22E,24R)-ergosta-5,8(14),22-triene-1',2'-dicarboxylic acid imide|ergosterimide	UVJQWIZGFAYGJK-UHFFFAOYSA-N	C32H45NO3	0.878622	pos	0	8.64464e+06	5.64374e+06	5.82326e+06
Astragaloside IV	QMNWISYXSJWHRY-UHFFFAOYSA-N	C41H68O14	0.428042	neg	2.41899e+06	0	2.20707e+06	5.80713e+06
13,14,15-trihydroxy-labd-8(17)-ene	JVDYHDMFSILONM-UHFFFAOYSA-N	C20H36O3	1.09634	neg	0	7.07178e+06	4.61048e+06	5.79139e+06
Brassicicene D	WRNBXNJPKBYCIY-UHFFFAOYSA-N	C21H30O5	0.671364	neg	369302	136914	2.55261e+06	5.79083e+06
methyl (2E,4Z)-4-acetylocta-2,4-dienoate|methyl xylariate C	PEWZIEQJXSUCMC-UHFFFAOYSA-N	C11H16O3	1.08375	pos	3.31095e+06	394010	3.24005e+06	5.78792e+06
6-O-[4-O-(6-O-syringyloyl-beta-D-glucopyranosyl)vanilloyl]-beta-D-glucopyranosyl 4-hydroxy-3,5-dimethylbenzoate	BUJGZNCOIAAXFE-UHFFFAOYSA-N	C38H44O22	0.594156	pos	4.50255e+06	0	3.31568e+06	5.78557e+06
3,4-Dihydroxybutanoic acid	DZAIOXUZHHTJKN-UHFFFAOYSA-N	C4H8O4	0.704849	neg	1.66034e+06	1.00445e+07	5.55729e+06	5.78143e+06
D-beta-homophenylalanine-HCl	BTCSSZJGUNDROE-UHFFFAOYSA-N	C4H9NO2	1.78968	pos	5.86856e+06	3.93883e+06	7.13391e+06	5.7706e+06
3,4-secofriedelane-3,28-dioic acid	FTXPTSPQRPOGGC-UHFFFAOYSA-N	C30H50O4	1.55881	neg	0	4.59133e+06	703184	5.76935e+06
6-methylspirost-5-en-3-ol	RJQCTQMDJCNDGK-UHFFFAOYSA-N	C28H44O3	0.36411	pos	0	1.44002e+06	1.55782e+07	5.73787e+06
SCHEMBL15782303	DDWGQGZPYDSYEL-UHFFFAOYSA-N	C20H18O6	1.30218	pos	1.87576e+06	0	2.56981e+06	5.73675e+06
S-Japonin	HDHDUJDLKYTRAS-UHFFFAOYSA-N	C19H28O3S	1.10958	neg	400369	1.07737e+06	1.74062e+06	5.73047e+06
3-Phenyllactic acid	VOXXWSYKYCBWHO-UHFFFAOYSA-N	C9H10O3	0.186635	neg	3.97229e+06	2.78768e+06	6.29525e+06	5.72627e+06
2-(4-Hydroxyphenethyl)-6-hydroxychromone	ZEEYITCRNXWBJA-UHFFFAOYSA-N	C17H14O4	0.113579	pos	1.37582e+07	0	4.20015e+06	5.72315e+06
Aristelegone A	BYOIVWRPJQKGMQ-UHFFFAOYSA-N	C12H14O2	1.0853	pos	526922	56594.6	3.9064e+06	5.72068e+06
Rubiadin	IRZTUXPRIUZXMP-UHFFFAOYSA-N	C15H10O4	1.57252	neg	2.72947e+06	2.10425e+06	1.89604e+07	5.71666e+06
Octadeca-9,12-dienal	HXLZULGRVFOIDK-UHFFFAOYSA-N	C18H32O	0.687987	pos	0	4.21476e+06	1.10029e+07	5.71529e+06
5,7,4'-Trimethoxyflavone	ZXJJBDHPUHUUHD-UHFFFAOYSA-N	C18H16O5	0.84791	pos	1.36021e+07	1.33222e+06	2.44847e+06	5.71374e+06
Allyl benzoate	LYJHVEDILOKZCG-UHFFFAOYSA-N	C10H10O2	0.144174	pos	7.56211e+06	4.714e+06	1.19408e+07	5.71037e+06
(Z),(Z)-hexadec-10,13-dienal	XVUOBZPYNZBZFQ-UHFFFAOYSA-N	C16H28O	0.46258	pos	341030	6.76999e+06	9.22494e+06	5.70951e+06
NSC295657	VQVYYLMLZPYPBR-UHFFFAOYSA-N	C43H60N2O2	0.159944	pos	0	7.9369e+06	9.79404e+06	5.70519e+06
MCULE-3799754175	AKSMCYXVBDZJRK-UHFFFAOYSA-N	C21H32O6	13.4165	neg	538910	910226	2.85977e+06	5.70191e+06
3-(Hydroxymethyl)-1-(3-methylbut-2-enyl)-6-oxabicyclo[3.2.0]hept-2-en-7-one	UGNVBODTSYDQPO-UHFFFAOYSA-N	C12H16O3	0.396111	pos	580251	224957	7.20742e+06	5.70142e+06
Hydroxyeremophilone	PIGIXBXGOOKXOZ-UHFFFAOYSA-N	C15H22O2	0.0685431	pos	1.69465e+06	3.50044e+06	6.36459e+06	5.68964e+06
Manuifolin G	FFMMCQPKRZWXRX-UHFFFAOYSA-N	C25H32O5	2.38081	neg	41059.2	9.81305e+06	5.01153e+06	5.68242e+06
Citrusin E	GPJDWVYEUMEYKE-UHFFFAOYSA-N	C17H24O9	1.11912	pos	209626	750471	6.15511e+06	5.68028e+06
Norjuniperolide	LRYKWHACOCKPKB-UHFFFAOYSA-N	C19H24O3	2.73279	pos	1.45582e+06	1.8254e+06	2.01194e+06	5.67524e+06
2',5',6'-trimethoxy-[2'',3'':3',4']furano dihydrochalcone	AENZNDXAPHOSHW-UHFFFAOYSA-N	C20H20O5	1.96542	pos	1.83904e+06	71000.3	2.81035e+06	5.67184e+06
Pawhuskin A	LZRXMBPDNILKDO-UHFFFAOYSA-N	C29H36O4	1.68678	pos	0	4.51548e+06	1.69192e+07	5.66868e+06
Isopropylbenzene	RWGFKTVRMDUZSP-UHFFFAOYSA-N	C9H12	0.847531	pos	785034	0	2.80239e+06	5.66129e+06
Calcium pantothenate	FAPWYRCQGJNNSJ-UBKPKTQASA-L	C9H17NO5.1/2 Ca	2.27829	neg	640204	2.24935e+07	6.23453e+06	5.66e+06
(2R,3S,4S)-2,3-trans-3,4-cis-7,4'-dimethoxy-3,4-flavandiol|4'.7-Dimethoxy-2.3-trans-flavan-3.4-cis-diol	DROLZNWFTXNVAI-UHFFFAOYSA-N	C17H18O5	2.55703	neg	3.5557e+06	39376.1	2.54141e+06	5.64989e+06
genkwanine B	JUJGXBCUCIDDJX-UHFFFAOYSA-N	C37H50O10	1.63208	neg	3.53482e+06	38083.7	1.97591e+06	5.64653e+06
NSC32992	UXAFRQPVHYZDED-UHFFFAOYSA-N	C27H33NO11	1.86656	pos	0	0	4.62649e+06	5.63781e+06
Pongapinnol A	WMVUNKYYHUBTIU-UHFFFAOYSA-N	C19H14O6	0.115782	pos	6.86779e+06	34618	3.71965e+06	5.63045e+06
zizyotin	QIWKOYIEWRVHRA-UHFFFAOYSA-N	C35H56O8	0.929144	neg	0	6.663e+06	4.85649e+06	5.62963e+06
methyl non-6-enoate	IAXJWKAHMIYBRY-UHFFFAOYSA-N	C10H18O2	2.25274	pos	915256	28826.9	3.02222e+06	5.6208e+06
9,9a-dihydro-naphtho[2,3-c]isoxazol-3(1H)-one|naphthisoxazol A	SGNVKVVRCUBSSV-UHFFFAOYSA-N	C11H9NO2	0.751701	pos	135460	1.91233e+07	1.08045e+07	5.61899e+06
2-Hydroxy-3-methyl-4H-pyran-4-one O-(6E-cinnamoyl-b-D-glucoside)	JRUMXTPQUYPUHC-UHFFFAOYSA-N	C21H22O9	0.704488	neg	277483	3.39862e+06	3.17201e+06	5.61399e+06
APTENIOL F	PFTZPLKUKCNQPZ-UHFFFAOYSA-N	C19H20O6	0.961876	pos	0	0	558446	5.60951e+06
3-(4-isobutyryloxy-3-methoxyphenyl)-2,3-epoxypropan-1-ol|4-O-isobutyryl-3-O-methyl-7,8-epoxyconiferyl alcohol	ANYWMXKIXPPVQG-UHFFFAOYSA-N	C14H18O5	0.0686906	neg	6.13784e+06	251493	4.02792e+06	5.58944e+06
Montadial A	GYXDZVGSSXSODD-UHFFFAOYSA-N	C12H12O4	1.84835	pos	2.50237e+06	825350	4.21989e+06	5.58548e+06
Apigenosylide B	LQXSGEOEMJXPTE-UHFFFAOYSA-N	C41H50O18	2.42101	neg	8.61224e+06	0	1.92203e+06	5.5769e+06
3alpha-(4-pent-2E-enoyloxy-pent-2E-enoyloxy)-9alpha-hydroxy-10alphaH-eremophil-7(11)-ene-8-one|3alpha-<4-pent-2E-enoyloxy-pent-2E-enoyloxy>-9alpha-hydroxy-10alphaH-eremophil-7(11)-ene-8-one	YCSNLVXCGGTCKP-UHFFFAOYSA-N	C27H40O6	0.474865	pos	3.42437e+06	751331	2.88674e+06	5.57408e+06
SCHEMBL21315811	WQDKJKKWQBBKSZ-UHFFFAOYSA-N	C31H34O14	1.95976	pos	47230.9	60104.3	4.58245e+06	5.57308e+06
maireistemoninol	SEHMQTZNJFHTDN-UHFFFAOYSA-N	C22H31NO6	2.29248	neg	0	7.09386e+06	4.27128e+06	5.56685e+06
Acutifolin palmitate	PIQGWMHSWPDBQZ-UHFFFAOYSA-N	C33H51NO5	1.54378	pos	0	1.71486e+06	413965	5.56197e+06
Framoside	VMQOLVQBURNDRH-UHFFFAOYSA-N	C32H38O13	2.11865	pos	5.20462e+06	723265	1.51006e+06	5.55554e+06
Clinopodic acid G	ZMVVNRHMWPOVBT-UHFFFAOYSA-N	C29H26O12	1.54882	neg	60064.8	13031.1	2.19885e+06	5.55451e+06
19-Hydroxy-19,20-Dihydrovincamajine	OEGZONSWPCBTKS-UHFFFAOYSA-N	C22H28N2O4	1.88331	pos	0	471463	3.82483e+06	5.55272e+06
ellipticine	CTSPAMFJBXKSOY-UHFFFAOYSA-N	C17H14N2	2.8361	pos	8.79558e+07	713026	7.63693e+06	5.53493e+06
2,5-Di-O-methylsenecioodontol	WSFSOZDLQDYURS-UHFFFAOYSA-N	C22H30O5	0.980746	neg	89903.3	6.41704e+06	4.64821e+06	5.52643e+06
Ginsenoside C-K	FVIZARNDLVOMSU-IRFFNABBSA-N	C36H62O8	0.882561	neg	2.1656e+06	5.09117e+06	4.61526e+06	5.5253e+06
NILOTICIN	GKQMMZUXYRXFOH-UHFFFAOYSA-N	C30H48O3	5.85715	pos	2.50614e+06	424725	2.75464e+06	5.52084e+06
pandamarilactonine-G	ZLNTZEKPGSFXGP-UHFFFAOYSA-N	C13H21NO3	0.906408	pos	2.57148e+06	0	4.22514e+06	5.51885e+06
9-oxooctadeca-10,12-dienoic acid	LUZSWWYKKLTDHU-UHFFFAOYSA-N	C18H30O3	1.61463	neg	759854	2.07805e+06	5.69204e+06	5.50346e+06
gamma-Glutamylisoleucine	SNCKGJWJABDZHI-ZKWXMUAHSA-N	C11H20N2O5	1.76551	pos	3.43355e+06	1.10881e+06	2.57561e+06	5.5022e+06
Piperphilippinin II	DVKRBDZWNSHISF-UHFFFAOYSA-N	C19H18O6	2.05151	pos	3.8414e+06	23672.7	1.49857e+06	5.50185e+06
albizinin	VFEYSSLJKRGMAH-UHFFFAOYSA-N	C27H32O17	0.551135	neg	2.08737e+06	0	1.31298e+06	5.50071e+06
β-Ionone	PSQYTAPXSHCGMF-BQYQJAHWSA-N	C13H20O	1.21242	pos	144404	3.73231e+06	6.24712e+06	5.49656e+06
Rhodioloside E	QSGZRCKKGZPIIZ-UHFFFAOYSA-N	C21H38O11	1.8704	neg	84783	9.03425e+06	5.80455e+06	5.49449e+06
SCHEMBL13754810	DKOQIDXJOZQKIG-UHFFFAOYSA-N	C12H20O10	0.406961	pos	2.06172e+07	747447	1.77749e+07	5.49197e+06
4-[3-[1-carboxy-2-[2-(3,4-dihydroxyphenyl)-2,3-dihydro-7-hydroxybenzofuran-3-carboxylic acid 1-carboxy-2-(3,4-dihydroxyphenyl)ethyl ester]ethoxy]-3-oxo-1-propenyl]-2-(3,4-dihydroxyphenyl)-2,3-dihydro-7-hydroxybenzofuran-3-carboxylic acid 1-carboxy-2-...	KOYGYRPGLFKTAS-UHFFFAOYSA-N	C54H44O24	0.540091	pos	4.25255e+06	0	3.09954e+06	5.49081e+06
2beta-methoxy-6alpha-O-angeloyl-2,3-dihydrohelenalin	WBRQQRMCYXDWBZ-UHFFFAOYSA-N	C21H28O6	2.57955	neg	1.26803e+07	1.10191e+06	1.69082e+06	5.49057e+06
Adynerin	BYZQVAOKDQTHHP-QFUJVLJYSA-N	C30H44O7	2.2967	neg	11853.7	2.97311e+06	1.88936e+06	5.48115e+06
Harzianin HB I	SUKBJVZBQBWEPA-UHFFFAOYSA-N	C57H100N12O13	5.62337	pos	0	3.98835e+06	5.08361e+06	5.46467e+06
Lachnanthofluorene	WEQGUVNFNHXVGR-UHFFFAOYSA-N	C19H10O4	2.89032	pos	1.14543e+07	0	3.58162e+06	5.46294e+06
Leonurin	DEQFJPVWHOMNOG-UHFFFAOYSA-N	C14H21N3O5	18.7106	pos	1.38715e+06	1.02962e+06	3.04581e+06	5.45987e+06
Juncuenin C	DHTDQIZTXZNGCV-UHFFFAOYSA-N	C18H16O4	0.995548	pos	1.37346e+06	0	2.57124e+06	5.44701e+06
1-(5-Methyl-5-vinyltetrahydrofuran-2-yl)ethanol	KXGRICWYAXBDDZ-UHFFFAOYSA-N	C9H16O2	0.167753	pos	376837	4.19188e+06	3.99164e+06	5.44588e+06
1-Ethyl-4,8-dimethoxy-beta-carboline	RSECXOGKRPREIU-UHFFFAOYSA-N	C15H16N2O2	0.412534	neg	521491	1.5367e+06	2.72955e+06	5.44458e+06
7-Hydroxy-6-methoxy-alpha-pyrufuran	QPJPNKHHNVCLCF-UHFFFAOYSA-N	C16H16O7	1.64929	pos	3.6716e+06	708763	3.35064e+06	5.44318e+06
3-O-(beta-D-glucopyranosyl)presenegenin 28-{O-alpha-L-arabinopyranosyl-(1->4)-O-beta-D-xylopyranosyl-(1->4)-O-alpha-L-rhamnopyranosyl-(1->2)-4-O-[(E)-4-methoxycinnamoyl]-beta-D-fucopyranosyl} ester	MZFBAUGRTNOBAQ-UHFFFAOYSA-N	C68H100O30	0.904369	pos	0	1.27409e+07	7.03026e+06	5.43906e+06
3-(hydroperoxymethyl)-6-(2-hydroxydodecan-2-yl)-4-methoxy-2H-pyran-2-one|peroxymonascuspyrone	AHKKIWBCTDQGQS-UHFFFAOYSA-N	C19H32O6	1.59597	neg	200316	353471	2.61018e+06	5.43407e+06
N-2-[4-(3,3-Dimethylallyloxy)phenyl]ethylcinnamide	GDBYZGRXGDJMHH-UHFFFAOYSA-N	C22H25NO2	0.454847	pos	8.50038e+06	171088	1.97976e+06	5.41448e+06
2-Linoleoyl Glycerol	IEPGNWMPIFDNSD-UHFFFAOYSA-N	C21H38O4	2.34338	pos	2.32228e+06	9.39497e+06	1.2613e+07	5.41358e+06
hostmanin C|rel-2'-hydroxy-4'-methoxy-5',6'-O-(4-isopropyl-1-methyl-cyclohexan-1-ol-5,6-O-yl)dihydrochalcone	OQZVJZANQOAJDB-UHFFFAOYSA-N	C26H32O5	2.61625	neg	66896.3	32161.8	2.23213e+06	5.40831e+06
Esculentic acid (Diplazium)	JXSVIVRDWWRQRT-UHFFFAOYSA-N	C30H48O5	2.25416	pos	2.44042e+06	87912.8	7.72544e+06	5.4081e+06
7(8)-dihydroisojusticidin B	CZEUIACCFFFCLU-UHFFFAOYSA-N	C21H18O6	0.783309	pos	1.69995e+06	0	3.05142e+06	5.40268e+06
Gentiatibetine	HCBOYQSYWSEVID-UHFFFAOYSA-N	C9H11NO2	0.0533315	pos	2.23109e+06	2.46092e+06	4.21595e+06	5.39664e+06
13'-(3,4-Methylene-dioxyphenyl)-tridecanoic acid|13'-(3,4-methylenedioxyphenyl)-tridecanoic acid|13-(3',4'-methylenedioxyphenyl)tridecanoic acid	HVOXKQOMYYREAI-UHFFFAOYSA-N	C20H30O4	1.10232	pos	2.11089e+06	1.17965e+07	3.42203e+06	5.39247e+06
SCHEMBL16553093	IRYKWGXAAUZTJT-UHFFFAOYSA-N	C9H16O5	1.20439	neg	6.5443e+06	654100	1.28362e+06	5.38872e+06
Hebelophyllene H	OFXNUSAWJJJGOF-UHFFFAOYSA-N	C15H22O3	1.54771	pos	93649	3.54295e+06	3.82265e+06	5.38697e+06
[1R-(1alpha,4beta,4abeta,6alpha,8aalpha)]-4-Ethoxy-1,2,3,4,4a,5,6,8a-octahydro-6-hydroxy-4,7-dimethyl-a-methylene-1-naphthaleneacetic acid methyl ester	MANZEPPAFJOHLB-UHFFFAOYSA-N	C18H28O4	1.86784	pos	215933	368947	7.5662e+06	5.38613e+06
benzaldehyde	HUMNYLRZRPPJDN-UHFFFAOYSA-N	C7H6O	0.37903	pos	2.50194e+06	1.85332e+06	3.82596e+06	5.38458e+06
2-methyl-2-hepten-6-one-1-ol	ADYUMOXBWMFCHT-UHFFFAOYSA-N	C8H14O2	3.79935	pos	119588	759119	2.37424e+06	5.38269e+06
(+)-(3S*,4R*)-dihydroxy-(5R*)-methoxysabinane	VFNPFBQSMLCPPF-UHFFFAOYSA-N	C11H20O3	0.99472	neg	4.68145e+06	252773	1.70109e+06	5.36114e+06
dodoviscin A	JOFIZXLDARFSIK-UHFFFAOYSA-N	C27H32O9	1.53235	neg	2.8088e+06	0	2.43264e+06	5.36051e+06
10-Deacetylbaccatin III	YWLXLRUDGLRYDR-ZHPRIASZSA-N	C29H36O10	0.17131	neg	3.88451e+06	0	1.86052e+06	5.34994e+06
Cycloastragenol	WENNXORDXYGDTP-UHFFFAOYSA-N	C30H50O5	0.634151	pos	77949.1	0	4.35973e+06	5.34786e+06
nigroside IV	BMOKZWFNXYQOGE-UHFFFAOYSA-N	C31H40O16	2.05896	neg	4.55495e+06	0	2.15173e+06	5.34338e+06
Hedychilactone C	LAIHLMZBILKPIA-UHFFFAOYSA-N	C20H28O4	1.10218	neg	2.54656e+06	195995	1.81502e+06	5.33029e+06
(2S)-1-O-linolenoyl-2-O-linoleoyl-3-O-[alpha-D-galactopyranosyl-(1''->6')-beta-D-galactopyranosyl]glycerol	OHMFSKZMPVONKQ-UHFFFAOYSA-N	C51H86O15	2.63505	pos	0	1.67723e+06	1.17303e+06	5.32628e+06
CHEMBL4444825	WVCALCYXKSQZFA-UHFFFAOYSA-N	C11H19N3O2	2.87774	pos	3.32875e+06	12947.2	1.51267e+06	5.32622e+06
28-Glucosyl-19(29)-dehydroursolic acid 3-arabinoside	TXWFEKCXGJREKU-UHFFFAOYSA-N	C41H64O12	2.42647	pos	4.83325e+06	203150	2.57943e+06	5.29864e+06
Isoastragaloside IV	MSSYPWFHLFBMMP-BQAOMNQWSA-N	C41H68O14	0.812261	pos	4.08717e+06	924230	2.56337e+06	5.29841e+06
desoxytagitinin B-3-O-methyl ether	TXFDVQUHIULIQA-UHFFFAOYSA-N	C20H30O5	0.885754	pos	1.73312e+07	234940	2.44684e+06	5.29547e+06
15-oxo-14,16H-seco-nidoresedic acid|15-oxo-14,16H-strictic acid	CATZMOCHWKLNEK-UHFFFAOYSA-N	C20H26O4	1.19649	pos	3.73694e+06	11100.4	2.02278e+06	5.29524e+06
(E)-2-Hexenyl Beta-D-Glucopyranoside|(E)-2-hexenyl beta-D-glucoside|(E)-2-hexenyl-beta-D-glucopyranoside|(E)-2-Hexenyl-??-D-glucopyranoside|erigeside B	GZDNGWOBFHUEOM-UHFFFAOYSA-N	C12H22O6	0.396757	neg	0	10528.2	4.17168e+06	5.29488e+06
4''-Deoxyterprenin	YCBXUIGXLWHDKF-UHFFFAOYSA-N	C25H26O5	1.32319	pos	0	0	1.74369e+07	5.294e+06
epicoccin L	ICHLCEDVEBEDDC-UHFFFAOYSA-N	C20H28N2O6S2	0.400758	pos	175034	82555.5	7.07558e+06	5.28801e+06
13-hydroxytimnodonate|Et ester-(all-Z)-13-Hydroxy-5,8,11,14,17-eicosapentaenoic acid	FRYOLNYYHOUSQS-UHFFFAOYSA-N	C22H34O3	0.0571804	neg	0	9.13956e+06	5.7038e+06	5.288e+06
L-Aspartic acid	CKLJMWTZIZZHCS-UHFFFAOYSA-N	C4H7NO4	3.19224	neg	3.14911e+06	201643	2.80763e+06	5.28523e+06
Leucinostatin Y	RNNIWZPLXMQCIS-UHFFFAOYSA-N	C60H104N10O15	4.46371	pos	0	3.52517e+06	5.83896e+06	5.28238e+06
Avocadyne	OHLQBKZXSJYBMK-UHFFFAOYSA-N	C17H32O3	0.0608336	pos	0	1.54825e+06	2.60237e+06	5.2791e+06
Daldinin D	FHJLYQODAHDGIV-UHFFFAOYSA-N	C21H24O10	0.267224	pos	3.8653e+06	63087.6	4.47644e+06	5.27736e+06
Xylogranatin O	AJNQUIUDKQWUQR-UHFFFAOYSA-N	C32H38O10	1.01256	neg	0	4.08175e+06	3.00531e+06	5.27365e+06
trigoxyphin G	LBNRPGWLEIKUBN-UHFFFAOYSA-N	C17H18O4	1.48373	neg	1.20257e+06	18538	2.29136e+06	5.27205e+06
alpha-o-methylbotrydialone|alpha-O-methyldihydrobotrydialone	GOGNSPHNRCZEML-UHFFFAOYSA-N	C18H28O6	0.539833	neg	4.7772e+06	37579.3	2.06244e+06	5.27009e+06
Methyl-3-hydroxybutyric acid	VEXDRERIMPLZLU-UHFFFAOYSA-N	C5H10O3	1.7718	pos	1.79725e+07	6.15295e+06	5.36623e+06	5.26915e+06
sinensol E	OCGQQYGGYOKOMB-UHFFFAOYSA-N	C27H28O5	1.17702	neg	71661.4	1.4508e+06	4.8302e+06	5.26863e+06
Justicidin B	RTDRYYULUYRTAN-UHFFFAOYSA-N	C21H16O6	1.28247	pos	1.83035e+06	0	2.22562e+06	5.26825e+06
Eriodictin	JMVXRLMOIOTWSB-UHFFFAOYSA-N	C21H22O10	0.230887	pos	548271	0	7.99531e+06	5.26715e+06
(E)-2,6-Dimethyl-2,5-heptadienoic acid	IGQGIACCENRGLM-SOFGYWHQSA-N	C9H14O2	2.12545	pos	230159	411789	2.94674e+06	5.26527e+06
2-(14-Hydroxy-14,15-dimethylhexadecyl)-3-methoxyquinoline-4(1H)-one	SHTZVUCESLDTQA-UHFFFAOYSA-N	C28H45NO3	0.623758	pos	0	2.1704e+07	1.50477e+07	5.26352e+06
O-Methylmahanine	JYCMSEXIUYQQTJ-UHFFFAOYSA-N	C24H27NO2	2.40929	neg	7615.41	914154	1.31436e+06	5.25576e+06
Lupulone E	AVOJMEPPTDIWFH-UHFFFAOYSA-N	C25H36O5	2.16066	neg	0	8.5304e+06	4.45282e+06	5.2554e+06
CHEMBL1915229	OIOGANSTEUPDQT-UHFFFAOYSA-N	C12H10O5	1.47975	pos	1.07378e+06	2.13417e+06	1.14199e+07	5.25207e+06
Glaucone B	KEJUUDFMOWLTNI-UHFFFAOYSA-N	C31H44O5	0.574807	pos	721911	1.37377e+06	2.9783e+06	5.2513e+06
radianspene E-AN	ZAFBDBZIQHIUHT-UHFFFAOYSA-N	C23H36O4	0.0901731	pos	902781	6.00424e+06	9.80963e+06	5.24629e+06
batudioic acid	BYMPHAAVYPFXAE-UHFFFAOYSA-N	C19H26O4	1.7836	pos	2.31165e+06	1.59568e+06	2.15311e+06	5.24559e+06
beta-Asarone	RKFAZBXYICVSKP-WAYWQWQTSA-N	C12H16O3	0.540978	pos	3.98054e+06	212433	2.32209e+06	5.23987e+06
O=C1C(O)=C(C)C(=O)c2c1c1c(C(C)(C)CCC1)cc2	LNBRCKHAVQLAHF-UHFFFAOYSA-N	C17H18O3	0.537489	neg	1.33109e+06	116064	2.45451e+06	5.22901e+06
4-Oxobedfordiasaeure-methylester	JZZHOKITGPASIG-UHFFFAOYSA-N	C16H24O3	3.54237	pos	378231	52834.4	2.78265e+06	5.22669e+06
(6aS,11aS)-3-hydroxy-6a,9-dimethoxy-10-(3',3'-dimethylallyl)pterocarpan|Erythribyssin A	IGSYALWDCAHJEF-UHFFFAOYSA-N	C22H24O5	1.45044	pos	3416.45	102467	1.72569e+06	5.22599e+06
4'-hydroxyliacylindrolide	DRQVPDMXTIJNFK-UHFFFAOYSA-N	C24H30O8	0.654403	neg	126581	4.87131e+06	3.48157e+06	5.22318e+06
SCHEMBL16887994	BACJQQZNSNNPKD-UHFFFAOYSA-N	C16H14O7	0.50095	pos	4.9657e+06	53583.2	3.24037e+06	5.22298e+06
(2S,3R,4S,5S,6R)-2-[4-[(3R,3aS,6S,6aR)-3a-hydroxy-3-(4-hydroxy-3-methoxyphenyl)-3,4,6,6a-tetrahydro-1H-furo[3,4-c]furan-6-yl]-2-methoxyphenoxy]-6-(hydroxymethyl)oxane-3,4,5-triol	GQLQVPZSTWXDBQ-ZOKOZUFBSA-N	C26H32O12	2.22978	pos	4.12922e+06	0	3.45317e+06	5.19701e+06
Magnolin	MFIHSKBTNZNJIK-RZTYQLBFSA-N	C23H28O7	0.825994	pos	51297.2	1.02684e+06	2.18277e+06	5.19478e+06
Avenestergenin B2	GQOZPIAGDDOAGV-UHFFFAOYSA-N	C37H52O6	1.07156	pos	1.31674e+06	37140.8	1.93004e+06	5.19476e+06
3beta-Acetoxyatractylon|3??-Acetoxy-atractylon	YYGOPZCCRBWMBK-UHFFFAOYSA-N	C17H22O3	2.10025	pos	145307	94757.2	3.71902e+06	5.19059e+06
19-acetoxy-ent-labda-8(17),12E,14-trien-3alpha-ol	LLXZEWYAZZZDDC-UHFFFAOYSA-N	C22H34O3	0.00681705	neg	0	4.73578e+06	4.36804e+06	5.17948e+06
(3Z,6S)-3-{{2-(1,1-dimethylprop-2-en-1-yl)-7-{[3-(hydroxymethyl)-3-methyloxiran-2-yl]methyl}-1H-indol-3-yl}methylidene}-6-methylpiperazine-2,5-dione|variecolorin N	QZTAZBGMDKXBOT-UHFFFAOYSA-N	C24H29N3O4	1.11841	pos	15726.9	5.54204e+06	5.30146e+06	5.17812e+06
karanjin	LKPQNZRGGNOPPU-UHFFFAOYSA-N	C18H12O4	0.881237	pos	945262	0	4.27792e+06	5.17745e+06
18-nor-ent-kaurene|ent-18-Nor-16-kaurene	ZSZRRSWODAXOPL-UHFFFAOYSA-N	C19H30	1.86443	neg	7335.77	9.23501e+06	3.97084e+06	5.17342e+06
ACon1_000943	DXQHDILKRYSUPK-UHFFFAOYSA-N	C22H32O6	1.03713	pos	270523	7.72492e+06	5.88579e+06	5.17312e+06
DODECANAMIDE	ILRSCQWREDREME-UHFFFAOYSA-N	C12H25NO	2.11866	pos	9.84979e+07	4.18036e+06	6.19361e+06	5.16357e+06
SCHEMBL12427457	OJUMAFDYWJDVPA-UHFFFAOYSA-N	C17H23N3O4	0.932593	neg	2.17825e+06	16388.3	2.64871e+06	5.1595e+06
Methyl jasmonate	GEWDNTWNSAZUDX-WQMVXFAESA-N	C13H20O3	0.652507	pos	494300	298659	2.42039e+06	5.15329e+06
4-Phenyltridecane	RZGVZPAWCGDMCK-UHFFFAOYSA-N	C19H32	1.50406	neg	0	6.14014e+06	3.82339e+06	5.14728e+06
Auxin b	MQETZQLZTJUQHR-UHFFFAOYSA-N	C18H30O4	2.9958	pos	2.69885e+06	87118.6	3.49222e+06	5.14665e+06
salvisyriacolide	WCXUHQRLXBOHIU-UHFFFAOYSA-N	C25H40O6	1.20324	neg	43289.1	533192	132790	5.14304e+06
Dihydroluteolin	SBHXYTNGIZCORC-UHFFFAOYSA-N	C15H12O6	2.01082	pos	632260	1.08604e+06	2.75937e+07	5.13685e+06
Schinifoline	HCUSLQJBGQJQCB-UHFFFAOYSA-N	C17H23NO	0.0917785	pos	1.19448e+06	735813	2.65337e+06	5.13564e+06
Ethyl 2-aminobenzoate	TWLLPUMZVVGILS-UHFFFAOYSA-N	C9H11NO2	0.0602786	pos	790481	3.71687e+06	7.62713e+06	5.12174e+06
Pectolinarin	DUXQKCCELUKXOE-CBBZIXHGSA-N	C29H34O15	0.954977	pos	4.29041e+06	0	2.87267e+06	5.11998e+06
Hirsutissimiside A	WBHHUJMFEZNDBL-UHFFFAOYSA-N	C27H28O12	1.29443	neg	2.74301e+06	0	2.6965e+06	5.10664e+06
4,2'-dihydroxy-4',5',6'-trimethoxychalcone	MZHFFPDKHDLFKQ-UHFFFAOYSA-N	C18H18O6	2.96367	neg	334488	297233	3.19725e+06	5.10007e+06
Bishopantholide	KKSBOIOUPUSWLD-UHFFFAOYSA-N	C17H20O8	0.598883	pos	2.86625e+06	16900.3	3.21386e+06	5.09528e+06
Dipropyl phthalate	MQHNKCZKNAJROC-UHFFFAOYSA-N	C14H18O4	2.67739	neg	4.90263e+06	4.83567e+06	4.38332e+06	5.07943e+06
Mangostenone E	GRTNCNHXAJFUAQ-UHFFFAOYSA-N	C24H28O8	0.940856	neg	10622.4	17761.3	3.28085e+06	5.073e+06
umbelactonyl cis-p-hydroxycinnamate	JBNDEPHIYXTXON-UHFFFAOYSA-N	C15H14O5	0.393871	neg	3.24264e+06	0	3.41099e+06	5.06444e+06
Cimifugin	ATDBDSBKYKMRGZ-ZDUSSCGKSA-N	C16H18O6	1.23484	pos	7.03833e+06	175129	1.9741e+06	5.06438e+06
5-METHYLTETRALINE	YXOVIGZJPGLNGM-UHFFFAOYSA-N	C11H14	3.0068	pos	2.92092e+06	122162	2.2533e+06	5.05521e+06
Linolenic acid ethyl ester	JYYFMIOPGOFNPK-UHFFFAOYSA-N	C20H34O2	1.37455	pos	0	7.88312e+06	8.38099e+06	5.03791e+06
Truxillic acid	QWFRRFLKWRIKSZ-UHFFFAOYSA-N	C18H16O4	1.06572	pos	5.29641e+06	0	1.79362e+06	5.03217e+06
Quinovic acid 3|A-O-(3',4'-O-isopropylidene)-|A-D-fucopyranoside	PJTJSVDBSNUINC-UHFFFAOYSA-N	C39H60O9	3.06982	pos	2.42502e+06	123115	1.96116e+06	5.029e+06
O-Geranylvanillin	SRLAFDUAEAXGBA-XNTDXEJSSA-N	C18H24O3	1.7258	pos	1.07367e+06	501434	1.76023e+06	5.02086e+06
Tussilagone	CFUPNMDNSQIWBB-UHFFFAOYSA-N	C23H34O5	1.19237	pos	39037.7	1.40948e+07	1.15995e+07	5.01969e+06
Loxodin	KDGYIQJGCXRCIL-UHFFFAOYSA-N	C25H28O8	0.205997	pos	33792.2	46009.9	5.52302e+06	5.01196e+06
2-(penta-1,3-diyn-1-yl)-5-[4-(2-methylbutyryloxy)-3-chloro-but-1-yn-1l]-thiophene|2-<penta-1,3-diyn-1-yl>-5-<4-(2-methylbutyryloxy)-3-chloro-but-1-yn-1l>-thiophene	FENHLPQAMQSGQO-UHFFFAOYSA-N	C18H17ClO2S	1.94226	pos	3.00623e+06	0	2.46127e+06	5.01145e+06
Homovanillic acid	QRMZSPFSDQBLIX-UHFFFAOYSA-N	C9H10O4	2.00181	neg	700014	176324	4.60954e+06	5.01105e+06
Malasseziazole C	ZUEZOQULQLAXBW-UHFFFAOYSA-N	C20H12N2O3	0.700631	pos	0	0	4.37662e+06	5.00912e+06
Bis-((E)-4-hydroxy-3,5-dimethoxy-benzyliden)-bernsteinsaeure-diaethylester|bis-((E)-4-hydroxy-3,5-dimethoxy-benzylidene)-succinic acid diethyl ester|diethyl (E,E)-2,3-bis(3,5-dimethoxy-4-hydroxybenzylidene)succinate|Phebalarin	DFHCCJWLEIUOLK-UHFFFAOYSA-N	C26H30O10	3.49037	pos	1.53695e+06	0	5.53356e+06	5.00573e+06
Isosyringinoside	RYVGCUJETSKZDU-ARJAWSKDSA-N	C23H34O14	2.53017	pos	8.88356e+06	173715	2.27267e+06	5.00109e+06
Aleprylic acid	GMYNCKRSFMEXPG-UHFFFAOYSA-N	C12H20O2	0.28978	neg	2.93932e+06	77870.1	2.11991e+06	4.99362e+06
17-benzoyloxy-20-O-(2,3-dimethylbutanoyl)-13-octanoyloxyingenol	BZHZKTXZUYERIW-UHFFFAOYSA-N	C41H56O10	1.4754	pos	381244	0	2.69369e+06	4.99253e+06
1,10,17-trihydroxymelfusanolide	VJRMCVCBCDACOE-UHFFFAOYSA-N	C20H32O6	0.38159	pos	3.43456e+06	64120.1	2.57187e+06	4.98308e+06
6-acetoxy-3-deacetoxycaesaldekarin e	PNIWOPXSKRPGQY-UHFFFAOYSA-N	C24H30O6	0.879164	neg	763452	3.38434e+06	2.77477e+06	4.98295e+06
Me ester-(all-E)-3-Hydroxy-7,9,15-heptadecatriene-11,13-diynoic acid	NOIYVUCQNSWLBC-UHFFFAOYSA-N	C18H22O3	0.572953	pos	2.55378e+06	0	2.42666e+06	4.98199e+06
Davuricoside J	PVOOFKAEZIVTOE-UHFFFAOYSA-N	C48H78O19	1.50656	neg	570456	0	2.01821e+06	4.97604e+06
1-Oleoyl-3-linoleoyl-rac-glycerol	GREDRAMJRDQWEJ-UHFFFAOYSA-N	C39H70O5	0.323241	pos	0	399887	151211	4.96852e+06
Perilloside A	YUTAFQVKXLDYFG-UHFFFAOYSA-N	C16H26O6	0.673163	pos	15714.1	106782	2.51721e+06	4.96659e+06
gracilioether B	DCHODBHTJLPAJL-UHFFFAOYSA-N	C19H28O4	1.52542	pos	39219	1.11221e+06	3.28614e+06	4.95285e+06
ABIESADINE N	QBAITYMIZWFOLG-UHFFFAOYSA-N	C21H30O3	2.21456	pos	4.40462e+06	1.14904e+07	5.13677e+06	4.95027e+06
2(Z)-O-feruloylgluconic acid	AVOFQNQPEDOPQI-UHFFFAOYSA-N	C16H20O10	0.453037	pos	0	4.61147e+06	2.60357e+06	4.94821e+06
Schweinfurthin H	RFLJGOACFXZRHJ-UHFFFAOYSA-N	C30H38O7	0.878496	neg	59720.3	165559	3.14678e+06	4.94014e+06
13E-Labdene-8alpha,15-diol 15-acetate	GYGSQPMBVQQYCF-UHFFFAOYSA-N	C22H38O3	0.180999	neg	0	4.00562e+06	5.23929e+06	4.92771e+06
laxiflorin B	ZJDNVMACHSNZNN-UHFFFAOYSA-N	C20H24O5	1.51726	neg	7441.26	56320.3	1.85864e+06	4.9249e+06
Ginsenoside F3	HJRVLGWTJSLQIG-ABNMXWHVSA-N	C41H70O13	1.30603	neg	740284	0	1.62626e+06	4.90742e+06
(E)-8-hydroxy-3-methyl-non-2-en-4-one	TYDFAQBVUJWLCN-UHFFFAOYSA-N	C10H18O2	2.75755	neg	2.87275e+06	200476	1.93654e+06	4.90138e+06
Verbascose	FLUADVWHMHPUCG-SWPIJASHSA-N	C30H52O26	1.47897	neg	5.78644e+06	0	1.56224e+06	4.89966e+06
1-Aminocyclopropanecarboxylic acid	PAJPWUMXBYXFCZ-UHFFFAOYSA-N	C4H7NO2	1.98233	pos	6.18664e+06	813758	4.75613e+06	4.88805e+06
fusaequisin A	YRVMEHJHUWJJNF-UHFFFAOYSA-N	C28H46O4	1.8268	neg	0	3.79038e+06	1.94715e+06	4.88314e+06
Lythrancine II	PHZITYJHCYPBFZ-UHFFFAOYSA-N	C29H37NO6	0.702204	pos	598876	4.718e+06	3.38164e+06	4.88038e+06
Liquiritin	DEMKZLAVQYISIA-ZRWXNEIDSA-N	C21H22O9	0.855986	neg	2.56403e+06	0	2.89777e+06	4.86612e+06
MG(18:0/0:0/0:0)[rac]	VBICKXHEKHSIBG-UHFFFAOYSA-N	C21H42O4	1.30612	pos	101567	1.92118e+07	1.63511e+07	4.85648e+06
N2-(3-Hydroxysuccinoyl)arginine	RPIGYIHDWMPXDY-UHFFFAOYSA-N	C10H18N4O6	1.04166	pos	7.97732e+06	170925	2.16225e+06	4.85194e+06
3-methoxy-5-undecylphenol	PGCYEKRDYMCFNF-UHFFFAOYSA-N	C18H30O2	0.135976	neg	0	5.50734e+06	5.51952e+06	4.84913e+06
mariline B	IDKSCTLOZOTDPO-UHFFFAOYSA-N	C23H33NO4	1.14057	pos	0	4.96093e+06	3.7824e+06	4.84779e+06
27'-hydroxyheptacosanyl cis-p-coumarate	AWTILWIMKJHZKF-UHFFFAOYSA-N	C36H62O4	1.22347	neg	0	2.67657e+06	2.21152e+06	4.8412e+06
Monocaprylin	GHBFNMLVSPCDGN-UHFFFAOYSA-N	C11H22O4	0.00608661	neg	4.43622e+06	38349.1	2.54678e+06	4.83224e+06
2-Mercaptobenzothiazole	YXIWHUQXZSMYRE-UHFFFAOYSA-N	C7H5NS2	0.808648	pos	36648.1	4.51656e+06	3.41905e+06	4.83069e+06
7beta,15-dihydroxy-17-succinyloxy-ent-cleroda-3-ene	DQBYZULBDHLLAH-UHFFFAOYSA-N	C24H40O6	0.369855	pos	0	3.60462e+06	2.68613e+07	4.81485e+06
Cinnamic acid	WBYWAXJHAXSJNI-VOTSOKGWSA-N	C9H8O2	2.8106	pos	1.46509e+06	301214	2.88366e+07	4.80874e+06
7,8-Epoxide-(E,E,E)-1,7,9,15-Heptadecatetraene-11,13-diyne|hepta-deca-1,9E,15E-trien-11,13-diyn-7,8-epoxide	GRIRFVRSWUHHTQ-UHFFFAOYSA-N	C17H20O	0.391482	neg	1.97646e+06	102027	2.11804e+06	4.79995e+06
CHEMBL274826	AEMFNILZOJDQLW-UHFFFAOYSA-N	C19H26O2	0.627953	neg	1.28549e+06	159750	2.30399e+06	4.79664e+06
feroniellide A	BRFQVMOVBFUJOV-UHFFFAOYSA-N	C38H55NO6	22.8716	pos	4497.03	6.78723e+06	2.25233e+06	4.79129e+06
FT-0696070	XXKNHBAFFJINCK-UHFFFAOYSA-N	C21H26O5	0.990315	neg	524201	1.32205e+06	3.76282e+06	4.78696e+06
(-)-epigallocatechin 3-O-(3',5'-di-O-methyl-gallate)|(-)-epigallocatechin-3-O-(3,5-O-dimethyl)-gallate	QAXISZJBSORHRN-UHFFFAOYSA-N	C24H22O11	0.311361	neg	2.29957e+06	5.0019e+06	3.69128e+06	4.78076e+06
2-Deoxyliguhodgsonal	VKFLVDGYLNXCSO-UHFFFAOYSA-N	C14H16O	1.67778	pos	305094	7.75958e+06	3.56506e+06	4.77217e+06
rostratamine 3-O-beta-D-oleandropyranosyl-(1->4)-beta-D-cymaropyranosyl-(1->4]-beta-D-cymaropyranoside	KGBKRGOQFYYJML-UHFFFAOYSA-N	C48H71NO16	2.52484	pos	140968	2.80698e+06	3.18324e+06	4.77157e+06
ACMC-20diej	OCLUXIQGSXDQNA-UHFFFAOYSA-N	C13H16O3	2.50061	neg	397619	16063.8	2.31198e+06	4.77131e+06
(24S,25S)-5alpha-spirostane-2alpha,3beta,5,6beta,24-pentol 2-O-beta-D-glucopyranosyl 24-O-<O-beta-D-glucopyranosyl-(1->2)-beta-D-glucopyranoside>	LPKRWODJKKQGPU-UHFFFAOYSA-N	C45H74O22	0.651639	neg	2.41001e+06	0	2.64411e+06	4.76025e+06
4-hydroxy-5,10-dimethyl-octahydro-azulen-8-one|jasonone	YUNOIGISYJWSIL-UHFFFAOYSA-N	C12H20O2	0.545476	neg	3.66901e+06	5.50988e+06	5.26614e+06	4.75645e+06
18alpha-acetoxylabd-8(17)-en-15-oic acid, methyl ester|methyl 18-acetoxy-8(17)-labden-15-oate	DLKBIWZQBIBLDR-UHFFFAOYSA-N	C23H38O4	0.435001	pos	0	6.42324e+06	5.64179e+06	4.75403e+06
Sinocrassoside A1	ANGVSFXLNVTHQA-UHFFFAOYSA-N	C25H26O11	0.523449	pos	76142.8	0	1.04822e+07	4.75274e+06
Nodakenitin	FWYSBEAFFPBAQU-GFCCVEGCSA-N	C14H14O4	0.911988	pos	254403	392369	3.97639e+06	4.74975e+06
Caucasicoside C	VJIVVCPIFZSKPE-UHFFFAOYSA-N	C46H74O20	3.25773	neg	2.29626e+06	29957	1.81676e+06	4.7466e+06
lachnophyllum acid(4-O-methyl siringenin)-ester|lachnophyllum acid<4-O-methyl siringenin>-ester	HVLQFFFGJMWZML-UHFFFAOYSA-N	C22H24O5	0.946922	neg	215687	0	3.06517e+06	4.74304e+06
Bulbineloneside C	AZYAWCYACHXAHP-UHFFFAOYSA-N	C28H24O12	2.31932	pos	13478.2	183462	6.15664e+06	4.73952e+06
5,8-Dihydroxy-7-(4-hydroxy-5-methylcoumarin-3-yl)coumarin	HYSXPHSQRZJJCF-UHFFFAOYSA-N	C19H12O7	0.766293	neg	0	5.66145e+06	915144	4.73871e+06
(3,4,5,6-tetrahydroxyoxan-2-yl)methyl 4-hydroxybenzoate	KBOQXAVWJMJUBC-UHFFFAOYSA-N	C13H16O8	0.271975	neg	1.46417e+06	635176	2.11231e+06	4.73685e+06
[(2R)-2-[(E,2S,4R)-4,6-dimethyloct-6-en-2-yl]-6-oxo-2,3-dihydropyran-3-yl] (2E,4E,6S)-8-hydroxy-6-(hydroxymethyl)-4-methylocta-2,4-dienoate	OHRGHFXATDKGOV-MDKHPKFKSA-N	C25H38O6	0.444108	pos	243241	1.06463e+07	2.03278e+07	4.73584e+06
CREATININE	DDRJAANPRJIHGJ-UHFFFAOYSA-N	C4H7N3O	1.89429	pos	4.44917e+06	208617	920864	4.72887e+06
Ergosterol	MHKXFCXWYUDLAD-UHFFFAOYSA-N	C27H42O	0.401369	pos	295139	2.79887e+06	2.3943e+06	4.72669e+06
(3Z)-12,13-Dihydrolaurediol	SJGLRUGQQJDJDC-UHFFFAOYSA-N	C15H24O2	0.617695	pos	2.54221e+06	241614	1.91415e+06	4.71388e+06
TETRACOSYL 3-(4-HYDROXY-3-METHOXYPHENYL)PROP-2-ENOATE	VUUWEVURXOCTGG-UHFFFAOYSA-N	C34H58O4	0.2674	neg	0	2.00355e+06	950437	4.71358e+06
2-Hydroxylinolenic acid	JQXGCBKGIBTCHY-FVCZIJCZSA-N	C18H30O3	2.66411	pos	248822	3.30989e+06	4.01232e+06	4.70735e+06
marmeline acetate|N-[2-acetoxy-2-[4'-(3'',3''-dimethylallyloxy)]phenyl]ethylcinnamide	HEOHAISYUOGPDX-UHFFFAOYSA-N	C24H27NO4	0.332068	pos	0	52630.1	1.64217e+06	4.70475e+06
Citrumarin A	HWZJQFNBCNCTQJ-UHFFFAOYSA-N	C34H34O7	0.759486	pos	4.02644e+06	65453.5	5.05752e+06	4.70244e+06
2-Ethyl-4,6,6-trimethyl-2-cyclohexene-1-one	CEPKOCWFQKOARE-UHFFFAOYSA-N	C11H18O	2.6555	neg	2.60955e+06	634165	1.8818e+06	4.70222e+06
SCHEMBL2640141	ZZFPYEQIYOWDGH-UHFFFAOYSA-N	C12H18O5	0.421648	neg	1.33204e+07	107288	1.57658e+06	4.70098e+06
8-Azabicyclo[3.2.1]octane-1,2,7-triol	YOBNKFROEGVQPW-UHFFFAOYSA-N	C7H13NO3	2.56166	neg	2.08509e+06	2.8116e+06	5.58491e+06	4.68788e+06
5,6-Dihydro-6-(6-hydroxyheptyl)-2H-pyran-2-one	CLTIBVYVKQWLQV-UHFFFAOYSA-N	C12H20O3	0.609895	pos	1.18457e+06	80784.1	4.85311e+06	4.68725e+06
Emodin	RHMXXJGYXNZAPX-UHFFFAOYSA-N	C15H10O5	2.35737	neg	3.39451e+06	0	2.76251e+06	4.68366e+06
3b,18b-3-Methoxy-11-oxo-12-oleanen-30-oic acid	RMIVRCBSQPCSCQ-UHFFFAOYSA-N	C31H48O4	0.766732	pos	0	4.2383e+06	4.5236e+06	4.68298e+06
Daphmacrine	HHUKBFWZEBQMEU-UHFFFAOYSA-N	C32H49NO4	0.192897	pos	65155.7	4.4153e+06	3.9491e+06	4.68112e+06
Octadeca-9,11,13-triinsaeure|Octadecatriin-(9,11,13)-saeure-(1)	CBWJECXEMSFLLW-UHFFFAOYSA-N	C18H24O2	0.0510345	neg	1.38698e+06	106074	2.0803e+06	4.66947e+06
(25R)-3beta-Acetoxy-5alpha-spirostan-6-on|(25R)-3beta-acetoxy-5alpha-spirostan-6-one	LHLXRPHIRHMTFQ-UHFFFAOYSA-N	C29H44O5	0.592989	neg	18527.9	3.88892e+06	1.27791e+06	4.66892e+06
2-(4-Amino-4-carboxybutyrylamino)-6-oxodecanoic acid	YKKFSDKZBGDWDC-UHFFFAOYSA-N	C15H26N2O6	1.69386	neg	1.15244e+06	25465.4	2.08295e+06	4.66885e+06
3b-Hydroxy-6b-(3-chloro-2-hydroxy-2-methylbutanoyloxy)-7(11)-eremophilen-12,8b-olide	GDXCVSFALPNRCV-UHFFFAOYSA-N	C20H29ClO6	1.18737	pos	1.22572e+06	0	2.53587e+06	4.66708e+06
arisanlactone C	OCNDEFBAGRLMSW-UHFFFAOYSA-N	C29H40O10	0.86396	pos	2.06576e+06	66028.6	2.8397e+06	4.66543e+06
Liquiritigenin	FURUXTVZLHCCNA-AWEZNQCLSA-N	C15H12O4	1.42881	neg	2.67963e+06	181264	3.21873e+06	4.66366e+06
Cappariloside A	ZVFUTZQNUQUJLW-UHFFFAOYSA-N	C16H18N2O6	0.20437	pos	0	0	2.97709e+06	4.66008e+06
Harunmadagascarin D	NRVDUEFDDRPHGV-UHFFFAOYSA-N	C30H36O5	0.335263	pos	1.69097e+06	55282.6	2.09245e+06	4.65451e+06
gardenone	WXXRZUXRKRIXTA-UHFFFAOYSA-N	C12H20O3	0.647671	pos	71661.6	40867.2	4.14153e+06	4.64912e+06
Cordycedipeptide A	LYDWCUQSOZRMRD-UHFFFAOYSA-N	C10H17N3O3	0.858122	pos	1.02056e+06	20422.4	2.40946e+06	4.64308e+06
3beta-acetoxy-24-methyl-25-ethyl-20,24-epoxydammarane|Ac-(3beta,20S,24R)-form-20,24-Epoxy-25-ethyl-24-methyldammaran-3-ol	WZNHAVSCNBJFAG-UHFFFAOYSA-N	C35H60O3	0.316318	neg	2.69237e+06	1.10322e+07	1.32647e+07	4.6384e+06
isoimperatorin	IGWDEVSBEKYORK-UHFFFAOYSA-N	C16H14O4	1.2651	neg	2.27414e+07	15241.6	2.46798e+06	4.63566e+06
Rehmaionoside C	UUBHXYINEPOWQI-UHFFFAOYSA-N	C19H32O8	0.205822	neg	0	5.71154e+06	1.7919e+06	4.63204e+06
glansreginin B	PCEIKJGGEIJIJP-UHFFFAOYSA-N	C24H38O15	2.33591	neg	3.29628e+06	0	1.56915e+06	4.60607e+06
Cyprotene	FMOZOFOCONBPNY-UHFFFAOYSA-N	C14H24	0.939183	neg	0	1.81125e+06	226931	4.60426e+06
Celastrol	KQJSQWZMSAGSHN-JJWQIEBTSA-N	C29H38O4	2.03049	pos	39712.2	2.99374e+06	9.65974e+06	4.60227e+06
8-Prenyllisetin	GQRNMTDWOFXCTJ-UHFFFAOYSA-N	C26H26O7	2.11651	neg	0	237756	0	4.59803e+06
(-)-(3Xi)-12-((rel-2R)-5c-hydroxy-6c-methyl-piperidin-2-yl)-3-methyl-dodecan-2-one|Cassin	OGPQOSAKRHKIHW-UHFFFAOYSA-N	C19H37NO2	0.902382	pos	0	3.3852e+06	6.97577e+06	4.59571e+06
12-O-Methylcarnosic acid	QQNSARJGBPMQDI-YCRPNKLZSA-N	C21H30O4	0.75344	pos	5.03778e+06	0	1.10972e+06	4.59531e+06
4-(4-Methylphenyl)pentanal	XPYKOJLMORBJQP-UHFFFAOYSA-N	C12H16O	1.8111	pos	618923	539299	2.37391e+06	4.58476e+06
((R)-9-methanesulfinyl-nonyl)-thiourea|((R)-9-Methansulfinyl-nonyl)-thioharnstoff|(R)-1-(9-Methylsulfinylnonyl)-thioharnstoff|N-[9-(omega-Methylsulfinyl)-nonyl]-thioharnstoff	QLEMYUIIHKJLEL-UHFFFAOYSA-N	C11H24N2OS2	2.43592	pos	28481.7	27638.8	3.99827e+06	4.58339e+06
(4aS,6aS,6bR,9R,10R,11R,12aR)-10,11-dihydroxy-9-(hydroxymethyl)-2,2,6a,6b,9,12a-hexamethyl-1,3,4,5,6,6a,7,8,8a,10,11,12,13,14b-tetradecahydropicene-4a-carboxylic acid	RWNHLTKFBKYDOJ-IJDLJTCJSA-N	C30H48O5	1.08868	pos	1.8746e+06	0	1.89987e+06	4.5818e+06
[10]-Gingergione	ZDFMHONYMPZGOT-UHFFFAOYSA-N	C21H32O4	0.748806	pos	589101	3.83533e+06	3.20217e+06	4.57676e+06
Hormezon	UREBDLICKHMUKA-UHFFFAOYSA-N	C22H29FO5	1.08796	neg	346123	260458	2.32731e+06	4.56583e+06
7-hydroxy-6-methoxychroman-2-one	XEHFSYYAGCUKEN-UHFFFAOYSA-N	C10H10O4	0.114662	pos	1.70229e+06	1.67873e+06	3.29799e+06	4.56227e+06
Plastoquinone C1	LPKUYLCNVCJPTL-UHFFFAOYSA-N	C27H38O4	0.362991	pos	1.84214e+06	164635	1.75743e+06	4.55972e+06
5-O-feruloyl-2-deoxy-D-ribono-gamma-lactone|[(2R,3S)-1,2,3,4-tetrahydro-3-hydroxy-5-oxofuran-2-yl]methyl (E)-3-(4-hydroxy-3-methoxyphenyl)prop-2-enoate	XRIDGQVLGQMCMX-UHFFFAOYSA-N	C15H16O7	1.13228	pos	3.76165e+06	416433	3.49306e+06	4.55104e+06
5,3',4'-Trihydroxy-7-methoxy-4-phenylcoumarin 5-O-(6''-acetyl)-galactoside	IHKNBCYHNGYRCB-UHFFFAOYSA-N	C24H24O12	1.08786	neg	2.88222e+06	0	1.88016e+06	4.54281e+06
16-formyl-3,8,26,31-tetrahydroxy-tritriaconta-1,9(Z),16(E),24(Z),32-pentaene-4,6,27,29-tetrayne|aciphyllal	NPMWBBAIGKRSFO-UHFFFAOYSA-N	C34H42O5	1.47963	pos	69279.4	1.53624e+07	6.69332e+06	4.53615e+06
Heliotropinone A	KUMTUFPJQNENGL-UHFFFAOYSA-N	C18H22O4	0.0614567	neg	897834	86131.9	1.41485e+06	4.53214e+06
kolavenolic acid	KGKQMWYCRSQMPF-UHFFFAOYSA-N	C20H34O3	0.455867	neg	0	4.26685e+06	4.68657e+06	4.53199e+06
3-Demethylcolchicine	JRRUSQGIRBEMRN-HNNXBMFYSA-N	C21H23NO6	0.782799	pos	288750	0	3.65382e+06	4.53079e+06
NSC118865	KHQMPLDSNBIPLK-UHFFFAOYSA-N	C10H16O3	0.462944	pos	482398	54090.8	2.68656e+06	4.52492e+06
2-formyl-3-hydroxyphenylpropanol	USFSXUYYGPLLQC-UHFFFAOYSA-N	C10H12O3	3.10449	neg	1.91107e+06	2.35632e+06	2.01796e+07	4.51714e+06
ipurolic acid	AVKYODWULTZQPQ-UHFFFAOYSA-N	C14H28O4	0.253657	neg	563403	94870.9	969993	4.51266e+06
Gentiside I	BFWBTIXVUPMKPV-UHFFFAOYSA-N	C28H48O4	0.882934	neg	0	4.66172e+06	2.47771e+06	4.50678e+06
3-methylbutyl 3-hydroxy-2-methylidenebutanoate	URBTVTZTLQVLCO-UHFFFAOYSA-N	C10H18O3	2.19558	neg	1.09725e+06	778948	908744	4.50159e+06
Spirosta-5,25(27)-diene-1beta,3beta,11alpha-triol	HAIJPYDYMMUVDU-UHFFFAOYSA-N	C27H40O5	0.0116093	neg	2.57943e+06	0	1.38255e+06	4.49675e+06
Chlorovenidol	PXCLIGUGCAGFAN-UHFFFAOYSA-N	C15H19ClO5	2.29496	pos	1.28123e+07	0	3.701e+06	4.49575e+06
MCULE-7800104034	NMAFOTFIMHUMSK-UHFFFAOYSA-N	C18H20N2O5	1.16542	neg	762510	235805	1.82638e+07	4.49002e+06
Papaverin	XQYZDYMELSJDRZ-UHFFFAOYSA-N	C20H21NO4	0.556447	pos	15829.5	0	1.83492e+06	4.47974e+06
ent-cleroda-3,13-diene-17-oic acid-15,16-olide	KZIDMGQRXAFSCG-UHFFFAOYSA-N	C20H28O4	1.3086	pos	997927	185943	1.1997e+06	4.47691e+06
Sarmentose	BNXOUFNLXOGIOT-UHFFFAOYSA-N	C7H14O4	2.05801	pos	3.55234e+06	5.56976e+06	4.18348e+06	4.45795e+06
Dimethyl azelate	DRUKNYVQGHETPO-UHFFFAOYSA-N	C11H20O4	1.12832	pos	231577	1.01273e+06	2.73146e+06	4.45731e+06
germacrenone	NBOAZLRJZITJPD-UHFFFAOYSA-N	C14H22O2	0.392668	pos	522139	3.70692e+06	2.08577e+06	4.45492e+06
5-hydroxy-4-isopropyl-1-methyl-7-(3-oxobutyl)bicyclo[4.1.0]hept-3-yl cinnamate	MZRGOEIFXVZAOF-UHFFFAOYSA-N	C24H32O4	1.53382	neg	569800	173856	3.50447e+06	4.45274e+06
Palutropone	BNCIJFGWLKTTGA-UHFFFAOYSA-N	C12H12O	12.7757	pos	3.30712e+06	335149	2.00461e+06	4.44439e+06
S-15183b	ZCUXUVQISKVJGB-UHFFFAOYSA-N	C27H40O5	0.144854	neg	3.01224e+06	0	945799	4.43919e+06
Antibiotic RP 1551-5	BSWQHKGZQYRASI-UHFFFAOYSA-N	C25H33ClO5	2.31322	pos	22807.9	0	3.43742e+06	4.43727e+06
Cylindrol A	VLFRJRBSRCFKPU-UHFFFAOYSA-N	C26H36O6	0.0146293	neg	3.55213e+07	6.11269e+06	6.57888e+06	4.43623e+06
6'-O-(1-hydroxy-4-oxo-cyclohexanacetyl)acteoside	PMMYCTDNPFFVSX-UHFFFAOYSA-N	C37H46O18	0.298767	neg	2.82998e+06	0	1.69191e+06	4.43386e+06
1R-hydroxymiltirone	PGMGYRXQLKELLG-UHFFFAOYSA-N	C19H22O3	1.13269	pos	2.3617e+06	1.57975e+06	2.16423e+06	4.43274e+06
Cyclopassifloic acid B	WXPOFBIHDUXUII-UHFFFAOYSA-N	C31H52O6	2.03601	pos	0	0	4.68551e+06	4.42472e+06
O-Methylhernandine	XSFZFSOPRBJQAU-UHFFFAOYSA-N	C19H25NO6	0.388166	pos	4.32789e+06	154512	2.20808e+06	4.41735e+06
12,13-EODE	CCPPLLJZDQAOHD-DHZHZOJOSA-N	C18H32O3	0.0435315	neg	1.4473e+06	7.11034e+06	2.50051e+06	4.41544e+06
JA	ZNJFBWYDHIGLCU-UHFFFAOYSA-N	C12H18O3	1.88949	pos	932175	2.87035e+06	3.90309e+06	4.41458e+06
3-Hydroxy-3-methyloxindole	XCHBYBKNFIOSBB-UHFFFAOYSA-N	C9H9NO2	2.52976	pos	154375	3.33502e+06	7.79631e+06	4.40632e+06
2,7-Dihydroxy-4-methoxyphenanthrene 2-O-glucoside	WMZBYVNQADXHMK-UHFFFAOYSA-N	C21H22O8	1.03008	neg	218591	0	3.8263e+06	4.40549e+06
Melochinin	CGMQWDJKIYCUOD-UHFFFAOYSA-N	C19H33NO3	2.51565	pos	567050	3.73884e+06	4.40922e+06	4.40525e+06
27-hydroxyspirosolane	GCDHTUKGDAYFNZ-UHFFFAOYSA-N	C27H43NO3	2.29122	neg	0	4.79037e+06	3.471e+06	4.40038e+06
deglucosyl euphorbioside A	OSIJBLWRVJSSLF-UHFFFAOYSA-N	C13H22O4	0.185044	neg	1.3433e+06	605225	1.07479e+06	4.39725e+06
(5E)-7-isopropyl-4-methylene-10-oxo-undec-5-enoic acid|tricinonoic acid	YHPXMAOELHYYDQ-UHFFFAOYSA-N	C15H24O3	0.890906	pos	4.90563e+06	61630.3	2.4168e+06	4.38732e+06
Okanin 3,4-dimethyl ehter 4'-glucoside	FYXHSRBJYWBBHF-UHFFFAOYSA-N	C23H26O11	1.38013	pos	2.35143e+06	273256	1.89145e+06	4.3859e+06
beta-L-Arap-(1 -> 3)-alpha-L-Araf-(1 -> 3)-[alpha-L-Araf-(1 -> 4)]-beta-D-Galp-(1 -> 6)-alphabeta-D-Galp	KPJKVIXZPAFUPU-UHFFFAOYSA-N	C27H46O23	0.408925	pos	195498	416565	3.91279e+06	4.37952e+06
SCHEMBL1512888	OGLFMTLLZNGZPP-UHFFFAOYSA-N	C10H13NO3	1.53109	neg	3.69385e+06	4.41526e+06	4.79716e+06	4.37421e+06
Hericenone G	GGXBOOLRGQUWIV-UHFFFAOYSA-N	C37H58O6	2.12836	pos	0	1.9789e+06	3.35136e+06	4.36857e+06
Sch 56396	DFTITSOGUUDLJM-UHFFFAOYSA-N	C17H20N2O3S	2.70423	pos	0	0	6.93108e+06	4.3674e+06
Podolactone E	GYGGJZCRRDXTBB-UHFFFAOYSA-N	C18H18O6	0.689583	pos	1.46379e+06	111283	2.20081e+06	4.36681e+06
4-(hydroxymethyl)-3,5-dimethyl-dihydrofuran-2(3H)-one|dihydro-4-(hydroxymethyl)-3,5-dimethyl-2(3H)-furanone	RHMRZYPABWGFIW-UHFFFAOYSA-N	C7H12O3	2.25695	neg	8.97684e+06	0	2.46761e+06	4.36525e+06
Heptanamide	AEDIXYWIVPYNBI-UHFFFAOYSA-N	C7H15NO	3.84758	pos	0	0	2.88433e+06	4.36366e+06
micropyrone	IJPRHCNTDLDONG-UHFFFAOYSA-N	C14H20O4	0.525532	neg	1.38235e+06	1.61517e+06	2.1676e+06	4.35759e+06
(22S)-cholest-5-ene-3beta,11beta,16beta,22-tetrol 16-O-alpha-L-rhamnopyranoside	YCZAEBFSTKVRIP-UHFFFAOYSA-N	C33H56O8	1.34852	neg	22425.5	2.87042e+07	1.34425e+07	4.35746e+06
ACMC-20dgsn	PNXZEOYIDGRIFH-UHFFFAOYSA-N	C20H34O6	1.79546	neg	114459	9.37224e+06	6.64675e+06	4.35289e+06
NIOSH/EL9202000	CKXIKZSNXVVTDZ-UHFFFAOYSA-N	C10H19NO	2.33877	pos	3.10811e+06	65348.2	1.62906e+06	4.35271e+06
17alpha-marsdenin|Marsdenin|Marsdenin, 17alpha-Marsdenin	LJLXEAWGZFDUAP-UHFFFAOYSA-N	C21H32O6	3.65089	pos	60469.5	221330	2.9089e+06	4.34901e+06
Mussaenin B	FJESLRIHRJETRJ-UHFFFAOYSA-N	C12H18O5	1.46463	pos	179044	0	2.7833e+06	4.34011e+06
Sumatrol	ZPEHYKMRUBEPSQ-UHFFFAOYSA-N	C23H22O7	1.80964	neg	207203	6515.09	1.13426e+06	4.33818e+06
taxumaiglucoside B heptaacetate	QOSYRUGCVRIMMV-UHFFFAOYSA-N	C37H42O19	1.06408	neg	1.09356e+07	0	982764	4.33702e+06
2(1H)-Naphthalenone,5,5'-(1,2-ethanediyl)bis[octahydro-1,1,4a-trimethyl-6-methylene-,(4aR,4'aR,5S,5'S,8aR,8'aR)- (9CI)	TWBVZVAEDWRAJO-UHFFFAOYSA-N	C30H46O2	1.4731	pos	1.98887e+06	0	2.22234e+06	4.33079e+06
19-epi-23-hydroxyspermostrychnine	OFRNYTYFWBPXRC-UHFFFAOYSA-N	C21H26N2O3	0.487703	pos	6.35939e+06	791960	3.03554e+06	4.31032e+06
3-O-(6'-O-galloyl)-beta-D-glucopyranosylmaltol	KJEHWCNZDXNILH-UHFFFAOYSA-N	C19H20O12	0.010833	neg	1.89304e+08	0	446716	4.30998e+06
Dehydrojuncuenin C	JDBSBPUNBBBQRY-UHFFFAOYSA-N	C18H14O4	0.613207	pos	3.55769e+06	68053	934223	4.30599e+06
Picrasidine B	VXIBHGSYBDCYKB-UHFFFAOYSA-N	C16H18N2O3	0.381813	neg	127865	98488.5	4.7156e+06	4.3009e+06
3-[3-acetyl-5-(3,7-dimethyl-2,6-octadienyl)-2,4,6-trihydroxybenzyl]-6-ethyl-4-hydroxy-5-methyl-2h-pyran-2-one	JNJPUUZKFGYDTE-UHFFFAOYSA-N	C27H34O7	1.70518	neg	5.04684e+06	1.11836e+06	1.86378e+06	4.29908e+06
ZINC253534716	GVVVEKSVCAGUTP-UHFFFAOYSA-N	C19H19N3O2	2.3604	pos	595548	0	2.47039e+06	4.29057e+06
aurovertin H	KQZNWRCEZLXYOS-UHFFFAOYSA-N	C25H32O10	2.30794	neg	55956.6	3.60877e+06	5.67356e+06	4.28894e+06
(+)-macrantoridine|2,3-dimethoxy-6-((R or S)-4-methoxy-6-methyl-5,6,7,8-tetrahydro-[1,3]dioxolo[4,5-g]isoquinolin-5-ylmethyl)-benzoic acid|Macrantoridin|Macrantoridine	REAJHAFEOXIXJD-UHFFFAOYSA-N	C22H25NO7	0.45152	pos	12977.7	26013.6	1.52534e+06	4.28459e+06
butyl 5-oxopyrrolidine-2-carboxylate	QBBAJUQOYIURHA-UHFFFAOYSA-N	C9H15NO3	0.109778	pos	3.81512e+06	1.02099e+06	2.03135e+06	4.28445e+06
Curassavioside A2	MZRAFZQAPHIUDA-UHFFFAOYSA-N	C47H68O16	0.386308	pos	1.89487e+06	98963.2	2.00304e+06	4.28272e+06
Sargaquinoic acid	IKUIJYZNRMQNBM-UHFFFAOYSA-N	C27H36O4	5.80454	pos	2.93664e+06	15846	581184	4.28238e+06
3beta-(beta-D-glucosyloxy)-16alpha,23alpha-epoxycucurbita-5,24-dien-11-one	NWRAOEGVNDIBIM-UHFFFAOYSA-N	C36H56O8	1.18765	pos	2.02839e+06	0	1.67747e+06	4.28152e+06
(13R,14R)-8-Labdene-13,14,15-triol	TWZQRBKMQYAKGQ-UHFFFAOYSA-N	C20H36O3	0.918888	pos	78779	2.71165e+06	3.38636e+06	4.27971e+06
Wilforlide A	HHQJBWYXBWOFJY-YLXTXNMFSA-N	C30H46O3	2.75741	pos	3.52393e+06	0	765616	4.27673e+06
Hynapene B	NLOFDOOJCSGCEJ-UHFFFAOYSA-N	C18H24O3	1.06437	neg	1.71074e+06	204524	759392	4.27634e+06
(E)-3-hydroxy-5,6-dihydro-beta-ionone	FEQPLOLFLKUQNO-UHFFFAOYSA-N	C13H22O2	0.0150645	pos	40649.2	2.83576e+06	4.72371e+06	4.27592e+06
Celsiogenin-A	XZPOAFFSJSSOHZ-UHFFFAOYSA-N	C29H46O2	0.889107	pos	0	6.06346e+06	5.15183e+06	4.27382e+06
Humilinolide C	UMAZUSDJQFBJAR-UHFFFAOYSA-N	C34H42O10	2.59209	pos	0	2.54404e+06	5.83839e+06	4.271e+06
Hebelophyllene G	AEOAKDQHDIICMZ-UHFFFAOYSA-N	C16H26O5	1.2824	neg	81875.6	2.31222e+06	117387	4.26317e+06
2-(2'-Hydroxypentyl)piperidin	UNJGJWVJJMZDOT-UHFFFAOYSA-N	C10H21NO	2.00799	pos	5.41714e+06	4.05434e+06	4.07861e+06	4.26033e+06
Deacetyllycofawcine	XDHYWTNJXQMCMQ-UHFFFAOYSA-N	C16H27NO3	2.19756	pos	36536.5	8.92444e+06	8.51749e+06	4.26017e+06
(-)-rel-(1R,4R,4aR,5R,7aS,8R,10R,11S,11aS,12aR)-1,5,10,11-tetrakis(acetyloxy)-4-(furan-3-yl)dodecahydro-4a,7a,9,9-tetramethyl-13-methylene-2,7-dioxo-6,12a-methano-4H,12aH-pyrano[4,3-b][1]benzoxocin-8-acetic acid methyl ester|cipadesin I	ZNZNNEJUEZHONU-UHFFFAOYSA-N	C35H42O15	2.5429	neg	7.33847e+06	0	2.11125e+06	4.25752e+06
threo-Guaiacylglycerol-beta-O-4'-dehydrodisinapyl ether	LCXGTSCVCJANHX-UHFFFAOYSA-N	C31H36O11	0.914199	neg	4.47486e+06	0	1.52009e+06	4.25733e+06
20-Epikibataline	AENSHGKORGDOBI-UHFFFAOYSA-N	C23H35NO2	29.1757	pos	434018	3.61254e+06	3.66353e+06	4.25661e+06
2-[4-[hydroxy(oxiran-2-yl)methyl]-2-methoxyphenyl]-4-(3-hydroxyprop-1-enyl)-6-methoxyphenol	BURBCKMEUJRARA-UHFFFAOYSA-N	C20H22O6	0.202136	neg	1.36446e+06	37105.8	2.26477e+06	4.25061e+06
Flavokawain A	CGIBCVBDFUTMPT-RMKNXTFCSA-N	C18H18O5	0.17367	neg	1.66197e+06	156981	3.32631e+06	4.24445e+06
solamin diacetate	PSTPUNZWIKIYNV-UHFFFAOYSA-N	C39H68O7	3.73054	pos	833927	2.12728e+06	1.35388e+06	4.24033e+06
Patulodin	GWWPRBVUUXKASM-UHFFFAOYSA-N	C23H26O8	0.986724	neg	1.07235e+06	40156.4	1.5821e+06	4.22206e+06
Swietemahonin C	QYPFXVUHMQMXKU-UHFFFAOYSA-N	C33H42O11	0.554349	pos	0	5.09454e+06	5.72953e+06	4.22172e+06
Mikanialactone	FDHDJFKBIUMVQY-UHFFFAOYSA-N	C18H26O4	1.34744	pos	3.73517e+06	379844	7.7263e+06	4.22153e+06
Chrysoobtusin glucoside,chryso-obtusin,Chrysoobtusin	ZMDXTRSTKHTSCE-UHFFFAOYSA-N	C19H18O7	1.592	neg	950424	49116.4	1.70229e+06	4.22061e+06
Guanosine	NYHBQMYGNKIUIF-UUOKFMHZSA-N	C10H13N5O5	1.95962	pos	3.53557e+06	1.12317e+06	1.70868e+06	4.21604e+06
genkwanine F	XGZZGUNAJRVNQJ-UHFFFAOYSA-N	C37H50O10	1.36824	neg	2.28022e+06	23620.9	1.17418e+06	4.21489e+06
5-hydroxy-7-(3,7,11,15-tetramethyl-2,6,10,11-hexadecatetraenyl)-2(3H)-benzofuranone|5-hydroxy-7-(3,7,11,15-tetramethylhexadeca-2,6,10,14-tetraenyl)-2(3H)-benzofuranone	KNRFZVZIHDOQLP-UHFFFAOYSA-N	C28H38O3	0.973708	neg	66652.3	8.92243e+06	9.29738e+06	4.21117e+06
3??-Acetoxy-4??-hydroxy-11(13)-eudesmen-12-oic acid methyl ester	CHDDYPARQRCBSM-UHFFFAOYSA-N	C18H28O5	2.36215	neg	5.2217e+06	227523	1.74544e+06	4.21017e+06
Indoleacrylic acid	SXOUIMVOMIGLHO-AATRIKPKSA-N	C11H9NO2	0.495346	neg	33046.5	1.37911e+07	7.55154e+06	4.19991e+06
MLS000876776	ZBLWKSUMHLVXAM-UHFFFAOYSA-N	C40H62O14	2.32977	neg	461720	0	8.19287e+06	4.19803e+06
Pinoresinol	HGXBRUKMWQGOIE-AFHBHXEDSA-N	C20H22O6	2.02127	pos	2.68301e+06	0	3.61919e+06	4.19596e+06
porrigenic acid	GDCBVHSUEZTUIW-UHFFFAOYSA-N	C18H30O4	3.12697	neg	356300	3.5232e+06	4.62002e+06	4.19509e+06
MEGxp0_001024	JMRXLJIRIMJFBW-UHFFFAOYSA-N	C20H28O5	1.51912	pos	71495.1	772403	2.67573e+06	4.18745e+06
isariotin F	BQBLZAMUHGIEFL-UHFFFAOYSA-N	C21H32ClNO5	0.0643684	neg	0	2.09403e+06	3.48554e+06	4.18626e+06
Tremulacin	RCKCYCDBDYUIGM-LFMHJWGUSA-N	C27H28O11	2.85356	pos	2.19557e+06	13100.9	3.63505e+06	4.18611e+06
papyrioside LF	RGERHEQGVLQHSS-UHFFFAOYSA-N	C50H78O19	1.00275	neg	2.21268e+06	763247	1.49214e+06	4.18397e+06
14-Acetylperegrine	XXYXSTFXDIDPHY-UHFFFAOYSA-N	C28H43NO7	1.49339	pos	0	6.42718e+06	4.73734e+06	4.18289e+06
octadeca-3t,9t,11t,17-tetraene-5,7-diynal	MAJQQFCQWVRQAH-UHFFFAOYSA-N	C18H20O	0.940396	pos	1.7533e+06	0	1.9023e+06	4.17765e+06
(2E,4E,6S)-6-methyl-2,4-octadienoic acid|Dendryphiellic acid A	DNUJBTBPCOIYRL-UHFFFAOYSA-N	C9H14O2	3.62198	pos	2.24277e+06	434196	2.20016e+06	4.16476e+06
Sinapine	HUJXHFRXWWGYQH-UHFFFAOYSA-O	C16H24NO5+	0.387087	pos	1.29502e+06	107979	959531	4.16395e+06
Ligulatin C	QXHYURXSMDXAIX-UHFFFAOYSA-N	C19H26O6	2.08027	neg	1.41173e+06	165212	1.973e+06	4.16123e+06
L-Histidine	HNDVDQJCIGZPNO-YFKPBYRVSA-N	C6H9N3O2	1.95443	pos	2.41487e+07	5.25928e+06	8.25283e+06	4.15934e+06
Bisbynin	ICHJNTDKHBXTFN-UHFFFAOYSA-N	C15H22O5	2.89769	pos	53023.1	274524	4.3356e+06	4.15028e+06
Kaempferol-4'-methyl ether	SQFSKOYWJBQGKQ-UHFFFAOYSA-N	C16H12O6	0.585945	pos	2.90072e+06	0	1.58919e+06	4.14622e+06
Isoferuloyl C1-glucuronide	RBJXXYNRHTWXDN-MBAOVNHDSA-N	C16H18O10	2.44285	pos	981768	0	2.24458e+06	4.14198e+06
6-O-beta-D-glucopyranosyl-2-O-(2-phenylpropionyl)-D-glucose	RAAJYFMFKGJBMV-UHFFFAOYSA-N	C21H30O12	0.513993	pos	3.71196e+07	0	3.40983e+06	4.13923e+06
depsilairdin	IWUVZHGEHIQGEQ-UHFFFAOYSA-N	C38H65N3O9	2.68698	pos	299776	6.29643e+07	9.06789e+06	4.11819e+06
8-Angeloyloxy-14-thapsanol	WYCGITBNEASEQG-UHFFFAOYSA-N	C20H32O4	2.23617	neg	0	3.0982e+06	1.82338e+06	4.11755e+06
4alpha,11-dihydroxy-3beta-(2-methylbutyryloxy)-eudesm-6-en-8-one	ZAFNSMRSXJWAEF-UHFFFAOYSA-N	C20H32O5	0.440068	neg	1.66441e+06	2.4923e+06	2.16701e+06	4.10772e+06
4-desmethylisotylocrebrine|4-Hydroxy-3,6,7-trimethoxyphenanthroindolizidine	BPEHLHZOKBXEFR-UHFFFAOYSA-N	C23H25NO4	0.584535	pos	4.80849e+06	145822	1.32272e+06	4.10291e+06
3-(Hydroxymethyl)-2,5-bis(3-methylbut-3-en-1-ynyl)benzene-1,4-diol|3-hydroxymethyl-2,5-bis(3-methylbut-3-en-1-ynyl)benzene-1,4-diol|sterehirsutinol	BRMAAADEEFMXPX-UHFFFAOYSA-N	C17H16O3	1.54228	pos	1.77343e+06	30066.1	2.11195e+06	4.10047e+06
Tectoridin	CNOURESJATUGPN-UDEBZQQRSA-N	C22H22O11	1.71878	pos	709290	778826	6.91976e+06	4.09877e+06
Eurycomalactone	OGHYZHNTIINXEO-MGBQOKOWSA-N	C19H24O6	0.00132672	pos	4.23381e+06	134716	1.85794e+06	4.08293e+06
15-desmethoxy-16-oxo-15,16H-seco-nidoresedic acid methyl ester|15-desmethoxy-16-oxo-15,16H-strictic acid methyl ester|methyl ester of 16-oxo-15,16H-strictic acid	UAYXKLJOJBUGGL-UHFFFAOYSA-N	C21H28O4	0.250941	pos	543269	8.14868e+06	3.76946e+06	4.07357e+06
(E)-6-[5-(3-furyl)-2-methylpent-2-enyl]-2,3-dimethoxy-1,4-benzoquinone|Arnebifuranone|isoarnebifuranone	AROFVSZVAKNDAP-UHFFFAOYSA-N	C18H20O5	0.0146993	neg	882158	0	1.57385e+06	4.06584e+06
Isophorone	HJOVHMDZYOCNQW-UHFFFAOYSA-N	C9H14O	3.61079	pos	1.71816e+06	1.3838e+06	2.29805e+06	4.05998e+06
(1S,4aR,6aS,6bR,9R,10R,11R,12aR,14bS)-1,10,11-trihydroxy-9-(hydroxymethyl)-2,2,6a,6b,9,12a-hexamethyl-1,3,4,5,6,6a,7,8,8a,10,11,12,13,14b-tetradecahydropicene-4a-carboxylic acid	IFIQVSCCFRXSJV-ZIZFEDMCSA-N	C30H48O6	1.11924	neg	0	5.53215e+06	3.02013e+06	4.05555e+06
8-zinniol acetate	FURQRAYGKDSRCZ-UHFFFAOYSA-N	C17H24O5	0.455831	neg	436247	2.77985e+06	1.78929e+06	4.05523e+06
adunctin A	SEFWPUMBPRKGFS-UHFFFAOYSA-N	C26H32O4	1.21828	neg	91626.5	7.93285e+06	9.89299e+06	4.05431e+06
8-Hydroxy-7-methoxy-2H-1-benzopyran-2-one	KIGCGZUAVODHMD-UHFFFAOYSA-N	C10H8O4	2.21638	pos	596789	1.04951e+06	4.02313e+07	4.05417e+06
4-OXONONANOIC ACID	PRDIIROHTWNJDB-UHFFFAOYSA-N	C9H16O3	1.52105	neg	4.00817e+06	1.33758e+07	2.05088e+07	4.05103e+06
11,15-Dihydroxy-16-kauren-19-oic acid	VRVOLALMVUEAHP-UHFFFAOYSA-N	C20H30O4	1.02368	neg	49402.8	5.14778e+06	2.61327e+06	4.0459e+06
Miltirone	FEFAIBOZOKSLJR-UHFFFAOYSA-N	C19H22O2	1.49221	pos	3.18835e+06	4.74544e+06	5.73631e+06	4.04541e+06
[truncated: 2,036 more rows]
